# Supplementary material
Source: publisher figshare collection journal article supplement (https://acs.figshare.com/ndownloader/files/3889663)
Supplement: Supplementary file 1 [file 3889663]

 
data_p2Bz2
 
_audit_creation_method            SHELXL-2014
_publ_contact_author_name 'Aleksandra Grudniewska'
_publ_contact_author_address
;
Department of Chemistry, Wroclaw University of Environmental and Life Sciences, 
Norwida 25, 50-375 Wroclaw, Poland
;
_publ_contact_author_email 'antahabibi@interia.pl'
_publ_author_name
;
Grudniewska Aleksandra,
Hayashi Sayaka,
Shimizu Mina,
Kato Masayuki,
Suenaga Midori, 
Imagawa Hiroshi,
Asakawa Yoshinori,
Ban Sayaka,
Kumada Toshio,
Hashimoto Toshihiro,
Umeyama Akemi,
;
_publ_author_address

;
Department of Chemistry, Wroclaw University of Environmental and Life Sciences, 
Norwida 25, 50-375 Wroclaw, Poland
;

_journal_name_full
;
Organic letters
;
_chemical_name_systematic
;

 (R)-4-((2R,3aR,4'S,5'S,6aS,E)-4'-((4-bromobenzoyl)oxy)-4-
((R)-5-methyldihydrofuran-2(3H)-ylidene)-5-oxooctahydro-
3'H-spiro[cyclopenta[b]furan-2,2'-furan]-5'-yl)butan-2-yl 4-bromobenzoate

;

_chemical_name_common             ?
_chemical_melting_point           ?
_chemical_formula_moiety          ?
_chemical_formula_sum
 'C33 H34 Br2 O8' 
_chemical_formula_weight          718.42

loop_
 _atom_type_symbol
 _atom_type_description
 _atom_type_scat_dispersion_real
 _atom_type_scat_dispersion_imag
 _atom_type_scat_source
 'C'  'C'   0.0033   0.0016
 'International Tables Vol C Tables 4.2.6.8 and 6.1.1.4'
 'H'  'H'   0.0000   0.0000
 'International Tables Vol C Tables 4.2.6.8 and 6.1.1.4'
 'O'  'O'   0.0106   0.0060
 'International Tables Vol C Tables 4.2.6.8 and 6.1.1.4'
 'Br'  'Br'  -0.2901   2.4595
 'International Tables Vol C Tables 4.2.6.8 and 6.1.1.4'
 
_space_group_crystal_system       monoclinic
_space_group_IT_number            4
_space_group_name_H-M_alt         'P 21'
_space_group_name_Hall            'P 2yb'
 
_shelx_space_group_comment
;
The symmetry employed for this shelxl refinement is uniquely defined
by the following loop, which should always be used as a source of
symmetry information in preference to the above space-group names.
They are only intended as comments.
;
 
loop_
 _space_group_symop_operation_xyz
 'x, y, z'
 '-x, y+1/2, -z'
 
_cell_length_a                    15.188(5)
_cell_length_b                    5.728(2)
_cell_length_c                    18.462(7)
_cell_angle_alpha                 90
_cell_angle_beta                  106.780(5)
_cell_angle_gamma                 90
_cell_volume                      1537.7(10)
_cell_formula_units_Z             2
_cell_measurement_temperature     296(2)
_cell_measurement_reflns_used     4336 
_cell_measurement_theta_min       2.30 
_cell_measurement_theta_max       28.45 
 
_exptl_crystal_description        needle 
_exptl_crystal_colour             colourless 
_exptl_crystal_density_meas       'not measured' 
_exptl_crystal_density_method     'not measured'              
_exptl_crystal_density_diffrn     1.552          
_exptl_crystal_F_000              732
_exptl_transmission_factor_min    ?                                             
_exptl_transmission_factor_max    ?                                             
_exptl_crystal_size_max           0.200
_exptl_crystal_size_mid           0.040
_exptl_crystal_size_min           0.020
_exptl_absorpt_coefficient_mu     2.687
_shelx_estimated_absorpt_T_min    0.616
_shelx_estimated_absorpt_T_max    0.948
_exptl_absorpt_correction_type    empirical 
_exptl_absorpt_correction_T_min   0.6155 
_exptl_absorpt_correction_T_max   0.9482 
_exptl_absorpt_process_details    ? 
 
_exptl_special_details
;
SADABS Sheldrick 1996
;
 
_diffrn_ambient_temperature       296(2)
_diffrn_radiation_wavelength      0.71073
_diffrn_radiation_type            MoK\a
_diffrn_source                    'rotating anode' 
_diffrn_radiation_monochromator   'multilayered conforcal mirror'                      
_diffrn_measurement_device_type   'CCD area detector' 
_diffrn_measurement_method         'phi and omega scans' 
_diffrn_detector_area_resol_mean  8.333 
_diffrn_reflns_number             8879
_diffrn_reflns_av_unetI/netI      0.0691
_diffrn_reflns_av_R_equivalents   0.0298
_diffrn_reflns_limit_h_min        -17
_diffrn_reflns_limit_h_max        19
_diffrn_reflns_limit_k_min        -7
_diffrn_reflns_limit_k_max        7
_diffrn_reflns_limit_l_min        -22
_diffrn_reflns_limit_l_max        24
_diffrn_reflns_theta_min          1.152
_diffrn_reflns_theta_max          28.714
_diffrn_reflns_theta_full         25.000
_diffrn_measured_fraction_theta_max   0.898
_diffrn_measured_fraction_theta_full  0.993
_diffrn_reflns_Laue_measured_fraction_max    0.898
_diffrn_reflns_Laue_measured_fraction_full   0.993
_diffrn_reflns_point_group_measured_fraction_max   0.774
_diffrn_reflns_point_group_measured_fraction_full  0.896
_reflns_number_total              6172
_reflns_number_gt                 4971
_reflns_threshold_expression      'I > 2\s(I)'
_reflns_Friedel_coverage          0.573
_reflns_Friedel_fraction_max      0.625
_reflns_Friedel_fraction_full     0.776
 
_reflns_special_details
;
 Reflections were merged by SHELXL according to the crystal
 class for the calculation of statistics and refinement.
 
 _reflns_Friedel_fraction is defined as the number of unique
 Friedel pairs measured divided by the number that would be
 possible theoretically, ignoring centric projections and
 systematic absences.
;
 
_computing_data_collection        'Bruker  APEX2'
_computing_cell_refinement        'Bruker  APEX2'
_computing_data_reduction         'Bruker  APEX2'
_computing_structure_solution     'SHELXS-97 (Sheldrick, 1990)'
_computing_structure_refinement   'SHELXL-2014 (Sheldrick, 2014)'
_computing_molecular_graphics     'Bruker SHELXTL'
_computing_publication_material   'Bruker SHELXTL'
 
_refine_special_details
;
 ?
;
_refine_ls_structure_factor_coef  Fsqd
_refine_ls_matrix_type            full
_refine_ls_weighting_scheme       calc
_refine_ls_weighting_details
'w=1/[\s^2^(Fo^2^)+(0.0697P)^2^] where P=(Fo^2^+2Fc^2^)/3'
_atom_sites_solution_primary      direct
_atom_sites_solution_secondary    difmap
_atom_sites_solution_hydrogens    geom
_refine_ls_hydrogen_treatment     constr
_refine_ls_extinction_method      none
_refine_ls_extinction_coef        .
_refine_ls_abs_structure_details
;
 Flack x determined using 1628 quotients [(I+)-(I-)]/[(I+)+(I-)]
 (Parsons, Flack and Wagner, Acta Cryst. B69 (2013) 249-259).
;
_refine_ls_abs_structure_Flack    0.005(12)
_chemical_absolute_configuration  ad
_refine_ls_number_reflns          6172
_refine_ls_number_parameters      390
_refine_ls_number_restraints      1
_refine_ls_R_factor_all           0.0622
_refine_ls_R_factor_gt            0.0486
_refine_ls_wR_factor_ref          0.1213
_refine_ls_wR_factor_gt           0.1169
_refine_ls_goodness_of_fit_ref    0.983
_refine_ls_restrained_S_all       0.983
_refine_ls_shift/su_max           0.000
_refine_ls_shift/su_mean          0.000
 
loop_
 _atom_site_label
 _atom_site_type_symbol
 _atom_site_fract_x
 _atom_site_fract_y
 _atom_site_fract_z
 _atom_site_U_iso_or_equiv
 _atom_site_adp_type
 _atom_site_occupancy
 _atom_site_site_symmetry_order  
 _atom_site_calc_flag
 _atom_site_refinement_flags_posn
 _atom_site_refinement_flags_adp
 _atom_site_refinement_flags_occupancy
 _atom_site_disorder_assembly
 _atom_site_disorder_group
Br1 Br 0.34724(4) -0.36102(13) 0.44180(3) 0.0481(2) Uani 1 1 d . . . . .
Br2 Br 0.16421(4) 0.17225(17) 0.38421(3) 0.0589(3) Uani 1 1 d . . . . .
C2 C 0.1432(3) 0.3051(12) 0.4718(3) 0.0339(15) Uani 1 1 d . . . . .
C4 C 0.0897(3) 0.6143(12) 0.5335(3) 0.0261(13) Uani 1 1 d . . . . .
H4 H 0.0624 0.7602 0.5322 0.031 Uiso 1 1 calc R U . . .
C7 C 0.1707(3) 0.1794(12) 0.5380(3) 0.0300(13) Uani 1 1 d . . . . .
H7 H 0.1980 0.0336 0.5390 0.036 Uiso 1 1 calc R U . . .
C6 C 0.1572(3) 0.2732(10) 0.6040(3) 0.0250(12) Uani 1 1 d . . . . .
H6 H 0.1745 0.1892 0.6490 0.030 Uiso 1 1 calc R U . . .
C5 C 0.1179(3) 0.4911(9) 0.6016(3) 0.0210(11) Uani 1 1 d . . . . .
C3 C 0.1022(3) 0.5199(12) 0.4671(3) 0.0340(14) Uani 1 1 d . . . . .
H3 H 0.0834 0.6003 0.4214 0.041 Uiso 1 1 calc R U . . .
C8 C 0.1085(3) 0.6034(9) 0.6712(3) 0.0180(10) Uani 1 1 d . . . . .
O1 O 0.0885(3) 0.8063(7) 0.6756(2) 0.0301(9) Uani 1 1 d . . . . .
O2 O 0.1253(2) 0.4532(6) 0.72938(18) 0.0215(8) Uani 1 1 d . . . . .
O9 O 0.0647(2) 0.2207(6) 0.85128(17) 0.0188(7) Uani 1 1 d . . . . .
C12 C -0.0083(3) 0.3858(10) 0.8410(3) 0.0216(11) Uani 1 1 d . . . . .
C10 C 0.1471(3) 0.3536(9) 0.8594(3) 0.0186(10) Uani 1 1 d . . . . .
H10 H 0.1643 0.4266 0.9096 0.022 Uiso 1 1 calc R U . . .
C9 C 0.1172(3) 0.5459(10) 0.8003(3) 0.0222(11) Uani 1 1 d . . . . .
H9 H 0.1539 0.6879 0.8153 0.027 Uiso 1 1 calc R U . . .
C35 C 0.0166(3) 0.5858(11) 0.7961(3) 0.0318(14) Uani 1 1 d . . . . .
H35A H -0.0217 0.5827 0.7440 0.038 Uiso 1 1 calc R U . . .
H35B H 0.0088 0.7352 0.8182 0.038 Uiso 1 1 calc R U . . .
O4 O -0.0105(2) 0.4779(7) 0.91186(18) 0.0231(8) Uani 1 1 d . . . . .
C15 C -0.0579(3) 0.3158(10) 0.9469(3) 0.0212(11) Uani 1 1 d . . . . .
H15 H -0.0144 0.2336 0.9887 0.025 Uiso 1 1 calc R U . . .
C14 C -0.1087(3) 0.1406(12) 0.8843(2) 0.0239(11) Uani 1 1 d . . . . .
H14 H -0.0778 -0.0115 0.8921 0.029 Uiso 1 1 calc R U . . .
C13 C -0.0983(3) 0.2565(10) 0.8127(3) 0.0255(12) Uani 1 1 d . . . . .
H13A H -0.0956 0.1411 0.7750 0.031 Uiso 1 1 calc R U . . .
H13B H -0.1487 0.3632 0.7912 0.031 Uiso 1 1 calc R U . . .
C18 C -0.2041(3) 0.1209(11) 0.8939(3) 0.0260(12) Uani 1 1 d . . . . .
C16 C -0.1311(3) 0.4400(12) 0.9744(3) 0.0309(14) Uani 1 1 d . . . . .
H16A H -0.1117 0.4527 1.0292 0.037 Uiso 1 1 calc R U . . .
H16B H -0.1423 0.5956 0.9530 0.037 Uiso 1 1 calc R U . . .
C17 C -0.2164(4) 0.2930(12) 0.9483(3) 0.0364(15) Uani 1 1 d . . . . .
O5 O -0.2847(3) 0.3218(10) 0.9701(3) 0.0605(16) Uani 1 1 d . . . . .
O6 O -0.2550(2) -0.1944(7) 0.8125(2) 0.0306(9) Uani 1 1 d . . . . .
C22 C -0.3379(3) -0.3396(12) 0.7834(3) 0.0297(12) Uani 1 1 d . . . . .
H22 H -0.3226 -0.5058 0.7907 0.036 Uiso 1 1 calc R U . . .
C21 C -0.4002(5) -0.269(2) 0.8282(6) 0.094(4) Uani 1 1 d . . . . .
H21A H -0.4614 -0.2390 0.7949 0.113 Uiso 1 1 calc R U . . .
H21B H -0.4042 -0.3922 0.8631 0.113 Uiso 1 1 calc R U . . .
C20 C -0.3633(4) -0.0589(14) 0.8697(4) 0.0431(17) Uani 1 1 d . . . . .
H20A H -0.3606 -0.0742 0.9226 0.052 Uiso 1 1 calc R U . . .
H20B H -0.4008 0.0756 0.8487 0.052 Uiso 1 1 calc R U . . .
C19 C -0.2685(3) -0.0346(11) 0.8609(3) 0.0288(13) Uani 1 1 d . . . . .
C23 C -0.3763(6) -0.285(2) 0.7023(4) 0.095(4) Uani 1 1 d . . . . .
H23A H -0.3870 -0.1205 0.6960 0.143 Uiso 1 1 calc R U . . .
H23B H -0.4333 -0.3675 0.6824 0.143 Uiso 1 1 calc R U . . .
H23C H -0.3336 -0.3330 0.6756 0.143 Uiso 1 1 calc R U . . .
C24 C 0.2238(3) 0.1916(9) 0.8552(3) 0.0190(10) Uani 1 1 d . . . . .
H24A H 0.2075 0.1164 0.8060 0.023 Uiso 1 1 calc R U . . .
H24B H 0.2311 0.0709 0.8933 0.023 Uiso 1 1 calc R U . . .
C25 C 0.3149(3) 0.3203(10) 0.8674(3) 0.0242(12) Uani 1 1 d . . . . .
H25A H 0.3076 0.4358 0.8277 0.029 Uiso 1 1 calc R U . . .
H25B H 0.3285 0.4033 0.9151 0.029 Uiso 1 1 calc R U . . .
C26 C 0.3960(3) 0.1675(11) 0.8681(3) 0.0262(11) Uani 1 1 d . . . . .
H26 H 0.4510 0.2655 0.8772 0.031 Uiso 1 1 calc R U . . .
C27 C 0.4154(4) -0.0291(11) 0.9250(3) 0.0319(13) Uani 1 1 d . . . . .
H27A H 0.3643 -0.1352 0.9134 0.048 Uiso 1 1 calc R U . . .
H27B H 0.4245 0.0336 0.9749 0.048 Uiso 1 1 calc R U . . .
H27C H 0.4699 -0.1107 0.9230 0.048 Uiso 1 1 calc R U . . .
O7 O 0.3794(2) 0.0534(7) 0.7938(2) 0.0259(8) Uani 1 1 d . . . . .
O8 O 0.4425(3) 0.3577(8) 0.7505(2) 0.0398(11) Uani 1 1 d . . . . .
C28 C 0.4066(3) 0.1695(11) 0.7407(3) 0.0274(12) Uani 1 1 d . . . . .
C30 C 0.4203(3) 0.1320(13) 0.6109(3) 0.0317(12) Uani 1 1 d . . . . .
H30 H 0.4491 0.2769 0.6179 0.038 Uiso 1 1 calc R U . . .
C29 C 0.3902(3) 0.0348(11) 0.6692(3) 0.0264(12) Uani 1 1 d . . . . .
C31 C 0.3477(3) -0.1820(11) 0.6584(3) 0.0283(12) Uani 1 1 d . . . . .
H31 H 0.3274 -0.2478 0.6968 0.034 Uiso 1 1 calc R U . . .
C32 C 0.3352(3) -0.3012(12) 0.5911(3) 0.0318(13) Uani 1 1 d . . . . .
H32 H 0.3074 -0.4475 0.5842 0.038 Uiso 1 1 calc R U . . .
C33 C 0.3648(3) -0.1986(12) 0.5339(3) 0.0340(14) Uani 1 1 d . . . . .
C34 C 0.4079(3) 0.0163(12) 0.5436(3) 0.0358(15) Uani 1 1 d . . . . .
H34 H 0.4282 0.0816 0.5051 0.043 Uiso 1 1 calc R U . . .
 
loop_
 _atom_site_aniso_label
 _atom_site_aniso_U_11
 _atom_site_aniso_U_22
 _atom_site_aniso_U_33
 _atom_site_aniso_U_23
 _atom_site_aniso_U_13
 _atom_site_aniso_U_12
Br1 0.0339(3) 0.0745(5) 0.0384(3) -0.0178(4) 0.0142(2) 0.0085(3)
Br2 0.0302(3) 0.1200(8) 0.0251(3) -0.0291(4) 0.0058(2) 0.0102(4)
C2 0.018(2) 0.064(4) 0.020(3) -0.015(3) 0.007(2) 0.000(3)
C4 0.021(2) 0.034(4) 0.026(2) 0.007(2) 0.0088(19) 0.002(2)
C7 0.019(2) 0.041(4) 0.031(3) -0.014(3) 0.008(2) -0.001(3)
C6 0.020(2) 0.033(3) 0.024(3) -0.002(2) 0.010(2) 0.000(2)
C5 0.017(2) 0.023(3) 0.024(2) 0.003(2) 0.009(2) -0.005(2)
C3 0.018(2) 0.062(4) 0.022(3) 0.009(3) 0.006(2) 0.000(3)
C8 0.018(2) 0.016(3) 0.022(2) 0.000(2) 0.0086(18) -0.0065(19)
O1 0.041(2) 0.025(2) 0.030(2) 0.0018(17) 0.0188(18) 0.0001(18)
O2 0.0265(17) 0.022(2) 0.0193(17) 0.0001(15) 0.0119(14) 0.0001(15)
O9 0.0144(14) 0.024(2) 0.0190(15) 0.0019(14) 0.0058(12) 0.0030(13)
C12 0.022(2) 0.028(3) 0.017(2) 0.002(2) 0.009(2) 0.010(2)
C10 0.019(2) 0.020(3) 0.018(2) -0.002(2) 0.0068(18) -0.002(2)
C9 0.028(3) 0.020(3) 0.021(2) -0.002(2) 0.011(2) 0.000(2)
C35 0.032(3) 0.042(4) 0.026(3) 0.011(2) 0.016(2) 0.020(3)
O4 0.0270(18) 0.028(2) 0.0188(17) -0.0018(15) 0.0129(14) 0.0013(16)
C15 0.015(2) 0.035(3) 0.015(2) 0.000(2) 0.0063(18) 0.004(2)
C14 0.0135(19) 0.037(3) 0.022(2) -0.002(3) 0.0065(17) -0.001(2)
C13 0.019(2) 0.041(3) 0.017(2) 0.000(2) 0.0056(19) 0.010(2)
C18 0.014(2) 0.038(3) 0.026(2) -0.010(3) 0.0064(18) -0.001(2)
C16 0.022(3) 0.053(4) 0.022(3) -0.011(3) 0.012(2) -0.001(3)
C17 0.025(3) 0.057(4) 0.031(3) -0.014(3) 0.015(2) -0.004(3)
O5 0.030(2) 0.100(4) 0.063(3) -0.048(3) 0.034(2) -0.020(2)
O6 0.0146(16) 0.041(3) 0.034(2) -0.0072(19) 0.0041(15) -0.0028(16)
C22 0.022(2) 0.033(3) 0.032(3) -0.004(3) 0.0050(19) -0.007(3)
C21 0.043(4) 0.139(10) 0.115(8) -0.084(8) 0.045(5) -0.044(5)
C20 0.018(3) 0.070(5) 0.043(4) -0.017(4) 0.012(2) -0.010(3)
C19 0.015(2) 0.046(4) 0.027(3) 0.000(3) 0.008(2) 0.003(2)
C23 0.070(5) 0.177(12) 0.033(4) -0.001(6) 0.006(3) -0.074(7)
C24 0.0146(19) 0.024(3) 0.019(2) 0.001(2) 0.0057(17) 0.000(2)
C25 0.020(2) 0.029(3) 0.024(3) -0.001(2) 0.006(2) -0.006(2)
C26 0.018(2) 0.035(3) 0.027(2) 0.002(3) 0.0089(18) -0.002(2)
C27 0.024(3) 0.040(4) 0.034(3) 0.004(3) 0.011(2) 0.002(3)
O7 0.0208(17) 0.033(2) 0.0277(19) 0.0012(16) 0.0120(15) -0.0009(15)
O8 0.044(2) 0.046(3) 0.028(2) 0.0030(19) 0.0088(18) -0.018(2)
C28 0.016(2) 0.035(4) 0.031(3) 0.009(3) 0.0066(19) -0.002(3)
C30 0.017(2) 0.046(4) 0.033(3) 0.006(3) 0.0084(19) 0.003(3)
C29 0.018(2) 0.037(3) 0.025(3) 0.003(2) 0.008(2) 0.004(2)
C31 0.019(2) 0.037(4) 0.030(3) 0.000(3) 0.009(2) 0.002(2)
C32 0.019(2) 0.040(4) 0.037(3) -0.004(3) 0.009(2) 0.002(2)
C33 0.019(3) 0.051(4) 0.032(3) -0.008(3) 0.008(2) 0.006(3)
C34 0.023(3) 0.056(4) 0.033(3) 0.006(3) 0.015(2) 0.003(3)
 
_geom_special_details
;
 All esds (except the esd in the dihedral angle between two l.s. planes)
 are estimated using the full covariance matrix.  The cell esds are taken
 into account individually in the estimation of esds in distances, angles
 and torsion angles; correlations between esds in cell parameters are only
 used when they are defined by crystal symmetry.  An approximate (isotropic)
 treatment of cell esds is used for estimating esds involving l.s. planes.
;
 
loop_
 _geom_bond_atom_site_label_1
 _geom_bond_atom_site_label_2
 _geom_bond_distance
 _geom_bond_site_symmetry_2
 _geom_bond_publ_flag
Br1 C33 1.888(6) . ?
Br2 C2 1.896(5) . ?
C2 C3 1.371(9) . ?
C2 C7 1.375(8) . ?
C4 C5 1.398(7) . ?
C4 C3 1.402(7) . ?
C4 H4 0.9300 . ?
C7 C6 1.398(7) . ?
C7 H7 0.9300 . ?
C6 C5 1.379(8) . ?
C6 H6 0.9300 . ?
C5 C8 1.481(7) . ?
C3 H3 0.9300 . ?
C8 O1 1.210(7) . ?
C8 O2 1.341(6) . ?
O2 C9 1.450(6) . ?
O9 C12 1.427(6) . ?
O9 C10 1.435(5) . ?
C12 O4 1.419(6) . ?
C12 C13 1.509(7) . ?
C12 C35 1.525(8) . ?
C10 C24 1.509(6) . ?
C10 C9 1.525(7) . ?
C10 H10 0.9800 . ?
C9 C35 1.524(7) . ?
C9 H9 0.9800 . ?
C35 H35A 0.9700 . ?
C35 H35B 0.9700 . ?
O4 C15 1.438(6) . ?
C15 C16 1.525(7) . ?
C15 C14 1.557(7) . ?
C15 H15 0.9800 . ?
C14 C18 1.514(6) . ?
C14 C13 1.528(7) . ?
C14 H14 0.9800 . ?
C13 H13A 0.9700 . ?
C13 H13B 0.9700 . ?
C18 C19 1.333(8) . ?
C18 C17 1.456(8) . ?
C16 C17 1.503(8) . ?
C16 H16A 0.9700 . ?
C16 H16B 0.9700 . ?
C17 O5 1.229(6) . ?
O6 C19 1.335(7) . ?
O6 C22 1.475(6) . ?
C22 C23 1.474(9) . ?
C22 C21 1.483(8) . ?
C22 H22 0.9800 . ?
C21 C20 1.448(11) . ?
C21 H21A 0.9700 . ?
C21 H21B 0.9700 . ?
C20 C19 1.502(7) . ?
C20 H20A 0.9700 . ?
C20 H20B 0.9700 . ?
C23 H23A 0.9600 . ?
C23 H23B 0.9600 . ?
C23 H23C 0.9600 . ?
C24 C25 1.525(6) . ?
C24 H24A 0.9700 . ?
C24 H24B 0.9700 . ?
C25 C26 1.508(7) . ?
C25 H25A 0.9700 . ?
C25 H25B 0.9700 . ?
C26 O7 1.473(6) . ?
C26 C27 1.510(8) . ?
C26 H26 0.9800 . ?
C27 H27A 0.9600 . ?
C27 H27B 0.9600 . ?
C27 H27C 0.9600 . ?
O7 C28 1.345(6) . ?
O8 C28 1.198(8) . ?
C28 C29 1.486(8) . ?
C30 C34 1.372(8) . ?
C30 C29 1.401(7) . ?
C30 H30 0.9300 . ?
C29 C31 1.387(8) . ?
C31 C32 1.382(8) . ?
C31 H31 0.9300 . ?
C32 C33 1.393(8) . ?
C32 H32 0.9300 . ?
C33 C34 1.381(9) . ?
C34 H34 0.9300 . ?
 
loop_
 _geom_angle_atom_site_label_1
 _geom_angle_atom_site_label_2
 _geom_angle_atom_site_label_3
 _geom_angle
 _geom_angle_site_symmetry_1
 _geom_angle_site_symmetry_3
 _geom_angle_publ_flag
C3 C2 C7 122.9(5) . . ?
C3 C2 Br2 119.4(4) . . ?
C7 C2 Br2 117.8(5) . . ?
C5 C4 C3 120.6(6) . . ?
C5 C4 H4 119.7 . . ?
C3 C4 H4 119.7 . . ?
C2 C7 C6 119.3(6) . . ?
C2 C7 H7 120.4 . . ?
C6 C7 H7 120.4 . . ?
C5 C6 C7 119.4(5) . . ?
C5 C6 H6 120.3 . . ?
C7 C6 H6 120.3 . . ?
C6 C5 C4 120.2(5) . . ?
C6 C5 C8 121.0(5) . . ?
C4 C5 C8 118.7(5) . . ?
C2 C3 C4 117.6(5) . . ?
C2 C3 H3 121.2 . . ?
C4 C3 H3 121.2 . . ?
O1 C8 O2 123.8(5) . . ?
O1 C8 C5 124.3(5) . . ?
O2 C8 C5 111.9(4) . . ?
C8 O2 C9 116.2(4) . . ?
C12 O9 C10 106.4(4) . . ?
O4 C12 O9 110.4(4) . . ?
O4 C12 C13 104.0(4) . . ?
O9 C12 C13 108.2(4) . . ?
O4 C12 C35 107.3(4) . . ?
O9 C12 C35 105.3(3) . . ?
C13 C12 C35 121.5(4) . . ?
O9 C10 C24 109.4(4) . . ?
O9 C10 C9 103.8(4) . . ?
C24 C10 C9 118.7(4) . . ?
O9 C10 H10 108.2 . . ?
C24 C10 H10 108.2 . . ?
C9 C10 H10 108.2 . . ?
O2 C9 C35 110.7(4) . . ?
O2 C9 C10 107.3(4) . . ?
C35 C9 C10 103.4(4) . . ?
O2 C9 H9 111.7 . . ?
C35 C9 H9 111.7 . . ?
C10 C9 H9 111.7 . . ?
C9 C35 C12 105.2(4) . . ?
C9 C35 H35A 110.7 . . ?
C12 C35 H35A 110.7 . . ?
C9 C35 H35B 110.7 . . ?
C12 C35 H35B 110.7 . . ?
H35A C35 H35B 108.8 . . ?
C12 O4 C15 108.8(4) . . ?
O4 C15 C16 110.9(5) . . ?
O4 C15 C14 106.7(4) . . ?
C16 C15 C14 107.2(4) . . ?
O4 C15 H15 110.6 . . ?
C16 C15 H15 110.6 . . ?
C14 C15 H15 110.6 . . ?
C18 C14 C13 118.4(4) . . ?
C18 C14 C15 104.3(4) . . ?
C13 C14 C15 102.1(5) . . ?
C18 C14 H14 110.5 . . ?
C13 C14 H14 110.5 . . ?
C15 C14 H14 110.5 . . ?
C12 C13 C14 102.9(4) . . ?
C12 C13 H13A 111.2 . . ?
C14 C13 H13A 111.2 . . ?
C12 C13 H13B 111.2 . . ?
C14 C13 H13B 111.2 . . ?
H13A C13 H13B 109.1 . . ?
C19 C18 C17 123.0(4) . . ?
C19 C18 C14 126.6(5) . . ?
C17 C18 C14 110.3(4) . . ?
C17 C16 C15 105.9(5) . . ?
C17 C16 H16A 110.5 . . ?
C15 C16 H16A 110.5 . . ?
C17 C16 H16B 110.5 . . ?
C15 C16 H16B 110.5 . . ?
H16A C16 H16B 108.7 . . ?
O5 C17 C18 127.3(5) . . ?
O5 C17 C16 123.4(5) . . ?
C18 C17 C16 109.3(4) . . ?
C19 O6 C22 110.6(4) . . ?
C23 C22 O6 107.3(5) . . ?
C23 C22 C21 112.4(7) . . ?
O6 C22 C21 104.9(5) . . ?
C23 C22 H22 110.7 . . ?
O6 C22 H22 110.7 . . ?
C21 C22 H22 110.7 . . ?
C20 C21 C22 108.1(6) . . ?
C20 C21 H21A 110.1 . . ?
C22 C21 H21A 110.1 . . ?
C20 C21 H21B 110.1 . . ?
C22 C21 H21B 110.1 . . ?
H21A C21 H21B 108.4 . . ?
C21 C20 C19 104.9(5) . . ?
C21 C20 H20A 110.8 . . ?
C19 C20 H20A 110.8 . . ?
C21 C20 H20B 110.8 . . ?
C19 C20 H20B 110.8 . . ?
H20A C20 H20B 108.9 . . ?
C18 C19 O6 122.0(4) . . ?
C18 C19 C20 127.7(5) . . ?
O6 C19 C20 110.2(5) . . ?
C22 C23 H23A 109.5 . . ?
C22 C23 H23B 109.5 . . ?
H23A C23 H23B 109.5 . . ?
C22 C23 H23C 109.5 . . ?
H23A C23 H23C 109.5 . . ?
H23B C23 H23C 109.5 . . ?
C10 C24 C25 112.1(4) . . ?
C10 C24 H24A 109.2 . . ?
C25 C24 H24A 109.2 . . ?
C10 C24 H24B 109.2 . . ?
C25 C24 H24B 109.2 . . ?
H24A C24 H24B 107.9 . . ?
C26 C25 C24 115.1(5) . . ?
C26 C25 H25A 108.5 . . ?
C24 C25 H25A 108.5 . . ?
C26 C25 H25B 108.5 . . ?
C24 C25 H25B 108.5 . . ?
H25A C25 H25B 107.5 . . ?
O7 C26 C25 109.3(4) . . ?
O7 C26 C27 105.3(5) . . ?
C25 C26 C27 115.7(4) . . ?
O7 C26 H26 108.8 . . ?
C25 C26 H26 108.8 . . ?
C27 C26 H26 108.8 . . ?
C26 C27 H27A 109.5 . . ?
C26 C27 H27B 109.5 . . ?
H27A C27 H27B 109.5 . . ?
C26 C27 H27C 109.5 . . ?
H27A C27 H27C 109.5 . . ?
H27B C27 H27C 109.5 . . ?
C28 O7 C26 117.0(4) . . ?
O8 C28 O7 123.8(5) . . ?
O8 C28 C29 123.6(5) . . ?
O7 C28 C29 112.5(5) . . ?
C34 C30 C29 120.9(6) . . ?
C34 C30 H30 119.5 . . ?
C29 C30 H30 119.5 . . ?
C31 C29 C30 119.1(6) . . ?
C31 C29 C28 123.0(5) . . ?
C30 C29 C28 117.9(5) . . ?
C32 C31 C29 120.6(5) . . ?
C32 C31 H31 119.7 . . ?
C29 C31 H31 119.7 . . ?
C31 C32 C33 118.9(6) . . ?
C31 C32 H32 120.5 . . ?
C33 C32 H32 120.5 . . ?
C34 C33 C32 121.5(6) . . ?
C34 C33 Br1 119.7(4) . . ?
C32 C33 Br1 118.9(5) . . ?
C30 C34 C33 119.0(6) . . ?
C30 C34 H34 120.5 . . ?
C33 C34 H34 120.5 . . ?
 
_refine_diff_density_max    0.660
_refine_diff_density_min   -1.043
_refine_diff_density_rms    0.080

_shelxl_version_number 2014-3

_shelx_res_file
;
TITL p2Bz2 in P2(1)
CELL 0.71073  15.1877   5.7278  18.4625  90.000 106.780  90.000
ZERR    2.00   0.0054   0.0021   0.0066   0.000   0.005   0.000
LATT -1
SYMM -X, 0.5+Y, -Z
SFAC C  H  O  Br
UNIT 66  68  16  4
L.S. 12
ACTA 50
BOND $h
FMAP 2
PLAN 20
size 0.02 0.04 0.2
TEMP 23.000
WGHT    0.069700
FVAR       0.43960
MOLE 1
BR1   4    0.347239   -0.361017    0.441800    11.00000    0.03392    0.07445 =
         0.03839   -0.01779    0.01416    0.00848
BR2   4    0.164213    0.172253    0.384211    11.00000    0.03022    0.11998 =
         0.02515   -0.02910    0.00584    0.01016
C2    1    0.143224    0.305057    0.471848    11.00000    0.01825    0.06394 =
         0.02029   -0.01457    0.00689   -0.00048
C4    1    0.089693    0.614326    0.533473    11.00000    0.02060    0.03358 =
         0.02563    0.00653    0.00884    0.00231
AFIX  43
H4    2    0.062357    0.760162    0.532162    11.00000   -1.20000
AFIX   0
C7    1    0.170709    0.179386    0.538048    11.00000    0.01862    0.04054 =
         0.03140   -0.01385    0.00832   -0.00089
AFIX  43
H7    2    0.197991    0.033630    0.538970    11.00000   -1.20000
AFIX   0
C6    1    0.157186    0.273154    0.603953    11.00000    0.01968    0.03343 =
         0.02428   -0.00241    0.01018   -0.00006
AFIX  43
H6    2    0.174512    0.189211    0.648969    11.00000   -1.20000
AFIX   0
C5    1    0.117947    0.491122    0.601621    11.00000    0.01677    0.02346 =
         0.02439    0.00336    0.00866   -0.00513
C3    1    0.102207    0.519940    0.467057    11.00000    0.01836    0.06162 =
         0.02227    0.00933    0.00633    0.00021
AFIX  43
H3    2    0.083353    0.600257    0.421397    11.00000   -1.20000
AFIX   0
C8    1    0.108520    0.603396    0.671235    11.00000    0.01755    0.01632 =
         0.02189    0.00007    0.00856   -0.00652
O1    3    0.088454    0.806251    0.675580    11.00000    0.04135    0.02452 =
         0.02975    0.00182    0.01881    0.00009
O2    3    0.125266    0.453193    0.729376    11.00000    0.02648    0.02207 =
         0.01926    0.00011    0.01186    0.00011
O9    3    0.064686    0.220673    0.851280    11.00000    0.01441    0.02356 =
         0.01898    0.00187    0.00584    0.00304
C12   1   -0.008286    0.385802    0.841047    11.00000    0.02171    0.02798 =
         0.01720    0.00166    0.00880    0.01043
C10   1    0.147072    0.353610    0.859445    11.00000    0.01853    0.02016 =
         0.01805   -0.00207    0.00675   -0.00225
AFIX  13
H10   2    0.164268    0.426572    0.909592    11.00000   -1.20000
AFIX   0
C9    1    0.117225    0.545870    0.800257    11.00000    0.02795    0.01961 =
         0.02134   -0.00178    0.01080    0.00006
AFIX  13
H9    2    0.153935    0.687920    0.815257    11.00000   -1.20000
AFIX   0
C35   1    0.016638    0.585811    0.796061    11.00000    0.03206    0.04191 =
         0.02636    0.01050    0.01621    0.01993
AFIX  23
H35A  2   -0.021702    0.582668    0.743973    11.00000   -1.20000
H35B  2    0.008828    0.735197    0.818177    11.00000   -1.20000
AFIX   0
O4    3   -0.010474    0.477864    0.911862    11.00000    0.02697    0.02751 =
         0.01880   -0.00183    0.01290    0.00130
C15   1   -0.057947    0.315808    0.946887    11.00000    0.01522    0.03466 =
         0.01488    0.00024    0.00628    0.00398
AFIX  13
H15   2   -0.014395    0.233635    0.988711    11.00000   -1.20000
AFIX   0
C14   1   -0.108711    0.140570    0.884287    11.00000    0.01350    0.03693 =
         0.02197   -0.00208    0.00648   -0.00108
AFIX  13
H14   2   -0.077832   -0.011501    0.892149    11.00000   -1.20000
AFIX   0
C13   1   -0.098292    0.256512    0.812707    11.00000    0.01935    0.04061 =
         0.01676    0.00016    0.00561    0.00969
AFIX  23
H13A  2   -0.095573    0.141052    0.774977    11.00000   -1.20000
H13B  2   -0.148674    0.363161    0.791201    11.00000   -1.20000
AFIX   0
C18   1   -0.204116    0.120943    0.893919    11.00000    0.01405    0.03828 =
         0.02610   -0.01013    0.00643   -0.00085
C16   1   -0.131106    0.440018    0.974433    11.00000    0.02175    0.05293 =
         0.02165   -0.01053    0.01198   -0.00058
AFIX  23
H16A  2   -0.111719    0.452712    1.029154    11.00000   -1.20000
H16B  2   -0.142268    0.595621    0.953004    11.00000   -1.20000
AFIX   0
C17   1   -0.216364    0.292973    0.948279    11.00000    0.02484    0.05695 =
         0.03139   -0.01436    0.01452   -0.00416
O5    3   -0.284738    0.321786    0.970138    11.00000    0.03026    0.10043 =
         0.06330   -0.04760    0.03357   -0.01984
O6    3   -0.254983   -0.194396    0.812548    11.00000    0.01464    0.04097 =
         0.03419   -0.00725    0.00410   -0.00279
C22   1   -0.337903   -0.339609    0.783355    11.00000    0.02195    0.03321 =
         0.03218   -0.00436    0.00498   -0.00688
AFIX  13
H22   2   -0.322566   -0.505789    0.790696    11.00000   -1.20000
AFIX   0
C21   1   -0.400194   -0.268697    0.828217    11.00000    0.04320    0.13899 =
         0.11495   -0.08366    0.04490   -0.04394
AFIX  23
H21A  2   -0.461396   -0.238991    0.794922    11.00000   -1.20000
H21B  2   -0.404220   -0.392211    0.863065    11.00000   -1.20000
AFIX   0
C20   1   -0.363295   -0.058855    0.869710    11.00000    0.01815    0.07031 =
         0.04292   -0.01726    0.01192   -0.01011
AFIX  23
H20A  2   -0.360641   -0.074197    0.922622    11.00000   -1.20000
H20B  2   -0.400821    0.075637    0.848719    11.00000   -1.20000
AFIX   0
C19   1   -0.268456   -0.034624    0.860936    11.00000    0.01542    0.04551 =
         0.02687   -0.00017    0.00811    0.00320
C23   1   -0.376271   -0.285440    0.702267    11.00000    0.07028    0.17749 =
         0.03264   -0.00141    0.00597   -0.07425
AFIX 137
H23A  2   -0.386975   -0.120494    0.695983    11.00000   -1.50000
H23B  2   -0.433265   -0.367537    0.682401    11.00000   -1.50000
H23C  2   -0.333557   -0.333014    0.675612    11.00000   -1.50000
AFIX   0
C24   1    0.223817    0.191626    0.855202    11.00000    0.01460    0.02374 =
         0.01929    0.00105    0.00572    0.00011
AFIX  23
H24A  2    0.207475    0.116418    0.806041    11.00000   -1.20000
H24B  2    0.231119    0.070907    0.893332    11.00000   -1.20000
AFIX   0
C25   1    0.314871    0.320345    0.867379    11.00000    0.01971    0.02895 =
         0.02371   -0.00072    0.00580   -0.00615
AFIX  23
H25A  2    0.307570    0.435848    0.827656    11.00000   -1.20000
H25B  2    0.328504    0.403332    0.915139    11.00000   -1.20000
AFIX   0
C26   1    0.395961    0.167452    0.868076    11.00000    0.01800    0.03487 =
         0.02714    0.00221    0.00894   -0.00198
AFIX  13
H26   2    0.450954    0.265541    0.877196    11.00000   -1.20000
AFIX   0
C27   1    0.415438   -0.029143    0.925012    11.00000    0.02351    0.04013 =
         0.03373    0.00386    0.01075    0.00208
AFIX 137
H27A  2    0.364326   -0.135214    0.913413    11.00000   -1.50000
H27B  2    0.424488    0.033553    0.974854    11.00000   -1.50000
H27C  2    0.469880   -0.110730    0.922959    11.00000   -1.50000
AFIX   0
O7    3    0.379429    0.053382    0.793811    11.00000    0.02081    0.03252 =
         0.02765    0.00119    0.01200   -0.00090
O8    3    0.442476    0.357700    0.750491    11.00000    0.04402    0.04629 =
         0.02799    0.00303    0.00885   -0.01846
C28   1    0.406609    0.169465    0.740696    11.00000    0.01550    0.03502 =
         0.03150    0.00890    0.00659   -0.00232
C30   1    0.420306    0.131993    0.610901    11.00000    0.01675    0.04616 =
         0.03301    0.00630    0.00838    0.00280
AFIX  43
H30   2    0.449146    0.276914    0.617910    11.00000   -1.20000
AFIX   0
C29   1    0.390157    0.034810    0.669205    11.00000    0.01782    0.03720 =
         0.02525    0.00338    0.00791    0.00448
C31   1    0.347656   -0.182046    0.658404    11.00000    0.01884    0.03740 =
         0.02967    0.00004    0.00864    0.00171
AFIX  43
H31   2    0.327393   -0.247790    0.696797    11.00000   -1.20000
AFIX   0
C32   1    0.335169   -0.301199    0.591116    11.00000    0.01901    0.04016 =
         0.03687   -0.00410    0.00922    0.00157
AFIX  43
H32   2    0.307444   -0.447512    0.584173    11.00000   -1.20000
AFIX   0
C33   1    0.364785   -0.198586    0.533852    11.00000    0.01881    0.05135 =
         0.03233   -0.00750    0.00815    0.00635
C34   1    0.407878    0.016339    0.543596    11.00000    0.02256    0.05599 =
         0.03312    0.00601    0.01495    0.00325
AFIX  43
H34   2    0.428151    0.081636    0.505143    11.00000   -1.20000
AFIX   0
HKLF 4

REM  p2Bz2 in P2(1)
REM R1 =  0.0486 for    4971 Fo > 4sig(Fo)  and  0.0622 for all    6172 data
REM    390 parameters refined using      1 restraints

END

WGHT      0.0696      0.0000

REM Highest difference peak  0.660,  deepest hole -1.043,  1-sigma level  0.080
Q1    1   0.1362  0.3011  0.3678  11.00000  0.05    0.66
Q2    1   0.3603 -0.2602  0.4041  11.00000  0.05    0.62
Q3    1   0.3592 -0.4766  0.4017  11.00000  0.05    0.58
Q4    1   0.3878 -0.5172  0.4588  11.00000  0.05    0.54
Q5    1   0.1764  0.0544  0.3468  11.00000  0.05    0.54
Q6    1   0.3366 -0.2490  0.4851  11.00000  0.05    0.52
Q7    1   0.3313 -0.4684  0.4919  11.00000  0.05    0.51
Q8    1   0.2200  0.0311  0.4089  11.00000  0.05    0.50
Q9    1   0.1794  0.2610  0.3399  11.00000  0.05    0.49
Q10   1   0.3006 -0.2230  0.4202  11.00000  0.05    0.48
Q11   1   0.1192  0.0502  0.3675  11.00000  0.05    0.46
Q12   1   0.3991 -0.2305  0.4606  11.00000  0.05    0.45
Q13   1  -0.3588 -0.4603  0.7036  11.00000  0.05    0.44
Q14   1   0.3020 -0.5174  0.4187  11.00000  0.05    0.42
Q15   1   0.1492  0.2637  0.4265  11.00000  0.05    0.42
Q16   1   0.1476  0.0212  0.4285  11.00000  0.05    0.41
Q17   1  -0.3974 -0.2736  0.6929  11.00000  0.05    0.38
Q18   1   0.2262  0.2538  0.4068  11.00000  0.05    0.33
Q19   1   0.2061  0.2983  0.4021  11.00000  0.05    0.33
Q20   1  -0.3806  0.0487  0.9106  11.00000  0.05    0.32
;
_shelx_res_checksum   78873

_shelx_hkl_file
;
   0   1   0   -2.80    0.61
   0   2   0 2007.96  114.80
   0   3   0    0.24    1.36
   0   4   0   60.01    5.00
   0   5   0    0.33    2.51
   1  -6   0   25.09   10.03
  -1   4   0   34.91    3.63
  -1   3   0   59.88    4.29
  -1   2   0   39.69    2.98
  -1   1   0  361.19   20.85
   1   0   0  334.64   15.90
   1   1   0  362.80   21.02
   1   2   0   40.83    3.40
   1   3   0   60.30    4.72
   1   4   0   44.99    4.50
   1   5   0   52.22    5.40
   2  -6   0   10.15    8.37
   2  -5   0   39.55    6.06
   2  -4   0   35.43    4.83
   2  -2   0  353.94   17.82
   2  -2   0  371.01   21.21
   2  -1   0  283.73   16.31
   2  -1   0  274.23   13.68
   2   0   0  273.84   17.15
   2   0   0  292.32   14.05
   2   1   0  587.76   28.83
   2   1   0  635.63   35.30
   2   2   0  474.62   27.61
   2   3   0  762.68   44.19
   2   4   0   20.95    3.03
   2   5   0   31.64    4.81
   2   6   0   12.88    4.03
   3  -6   0    7.99    7.10
   3  -5   0   42.87    6.21
   3  -4   0   34.57    5.07
   3  -4   0   28.75    4.22
   3  -3   0    2.69    2.37
   3  -3   0    5.18    1.92
   3  -2   0   51.03    3.80
   3  -2   0   50.65    4.10
   3  -1   0    7.85    1.39
   3  -1   0    7.13    0.98
   3   0   0  202.88    9.27
   3   0   0  183.37   11.28
   3   1   0   11.95    1.39
   3   1   0   13.04    1.56
  -3  -2   0   50.58    3.16
   3   2   0   46.38    3.96
   3   3   0    2.96    1.94
  -3  -3   0    4.60    1.26
   3   4   0   28.80    4.35
  -3  -4   0   35.11    3.42
   3   5   0   34.53    5.05
   3   6   0    6.16    3.94
   4  -6   0   17.81    6.72
   4  -5   0   56.29    6.99
   4  -4   0   59.54    5.81
   4  -3   0   61.84    5.21
   4  -3   0   63.17    4.91
   4  -2   0 1091.45   62.95
   4  -2   0 1105.02   52.24
   4  -1   0 4896.72  230.27
   4   0   0 9999.64  447.81
   4   0   0 9110.73  546.29
   4   1   0 4771.07  223.70
   4   1   0 4773.96  273.53
   4   2   0 1013.49   59.02
   4   2   0  953.47   48.20
  -4  -2   0 1108.02   56.51
  -4  -3   0   65.55    4.08
   4   3   0   54.97    5.20
   4   4   0   53.29    5.40
   4   5   0   67.39    6.45
   4   6   0   21.22    4.70
   5  -7   0   -2.72    9.57
   5  -6   0   18.38    6.68
   5  -5   0   10.14    4.53
   5  -4   0   47.07    5.59
   5  -3   0    5.92    1.95
   5  -3   0    7.13    2.67
   5  -2   0  225.28   11.76
   5  -1   0  112.38    6.13
   5  -1   0  110.03    6.66
   5   0   0  226.55   10.59
   5   0   0  210.25   12.87
   5   1   0   97.13    6.25
   5   1   0   90.80    4.84
   5   2   0  197.38   12.26
  -5  -2   0  215.23   11.17
   5   2   0  184.04    9.79
   5   3   0   10.07    2.38
  -5  -3   0    7.94    1.34
   5   4   0   46.89    5.14
   5   5   0   22.09    4.02
   5   6   0   19.68    4.71
   5   7   0    3.74    5.06
   6  -7   0    3.70    8.91
   6  -6   0    5.74    6.05
   6  -5   0  104.64    8.69
   6  -4   0  208.66   12.18
   6  -3   0    3.51    2.70
   6  -2   0  464.92   22.88
   6  -1   0  479.05   27.54
   6  -1   0  475.56   22.96
   6   0   0  467.52   28.07
   6   0   0  501.31   23.05
   6   1   0  516.48   24.35
   6   1   0  509.68   29.89
   6   2   0  402.45   19.36
   6   2   0  406.22   23.92
   6   3   0    5.12    2.31
   6   4   0  186.33   12.25
   6   5   0   78.30    7.11
   6   6   0    6.44    4.36
   6   7   0    3.12    4.98
   7  -7   0   -2.48    8.53
   7  -6   0   -0.74    5.73
   7  -5   0    7.55    4.70
   7  -4   0   18.88    4.17
   7  -3   0   40.28    5.11
   7  -2   0  532.99   26.05
   7  -1   0  120.72    6.52
   7  -1   0  111.21    7.15
   7   0   0   14.21    1.69
   7   0   0   14.98    1.88
   7   1   0   93.74    5.12
   7   1   0   92.14    6.47
   7   2   0  460.85   21.97
   7   2   0  457.48   27.10
   7   3   0   37.87    4.54
   7   4   0   10.56    3.25
   7   5   0    2.88    3.56
   7   6   0    2.15    4.29
   8  -7   0   15.66    8.99
   8  -6   0    3.55    6.03
   8  -5   0   57.10    7.41
   8  -4   0   14.89    4.24
   8  -3   0  167.50   10.16
   8  -2   0  367.04   18.47
   8  -1   0 3461.11  201.29
   8  -1   0 3588.88  165.25
   8   0   0  232.08   11.48
   8   0   0  231.16   14.02
   8   1   0 3168.03  143.44
   8   1   0 2954.99  175.09
   8   2   0  281.10   13.86
   8   2   0  283.86   17.27
   8   3   0  136.07    7.28
   8   3   0  128.53    9.27
   8   4   0   12.17    3.50
   8   5   0   45.73    5.93
   8   6   0    2.27    4.40
   9  -6   0    5.07    6.30
   9  -5   0   30.05    5.93
   9  -4   0   50.26    6.57
   9  -3   0   58.95    6.23
   9  -2   0  158.53    9.21
   9  -1   0  133.53    7.48
   9  -1   0  133.07    8.51
   9   0   0   16.85    2.48
   9   0   0   17.41    2.24
   9   1   0   88.77    6.70
   9   1   0   90.27    5.27
   9   2   0  128.49    7.03
   9   2   0  131.77    9.11
   9   3   0   46.32    3.96
   9   3   0   43.62    5.31
   9   4   0   41.13    5.60
   9   5   0   29.75    5.04
   9   6   0   14.15    4.96
  10  -6   0    7.44    6.57
  10  -5   0   22.57    5.84
  10  -4   0   69.13    7.38
  10  -3   0  139.42    9.36
  10  -2   0  280.02   14.69
  10  -1   0  292.55   14.70
  10   0   0  214.68   11.00
  10   0   0  215.19   13.43
  10   1   0  228.31   11.63
  10   1   0  230.68   14.41
  10   2   0  324.56   19.96
  10   2   0  327.61   16.10
  10   3   0  106.25    6.22
  10   3   0   93.67    8.04
  10   4   0   49.54    6.15
  10   5   0   20.91    4.80
  10   6   0    6.47    4.79
  11  -6   0   -0.27    6.78
  11  -5   0    2.90    5.58
  11  -4   0   10.26    5.00
  11  -3   0    6.63    4.12
  11  -2   0   41.24    5.17
  11  -1   0  171.47    9.41
  11   0   0  136.56    9.34
  11   0   0  136.96    7.74
  11   1   0  144.34    9.86
  11   1   0  138.94    7.91
  11   2   0   35.79    3.97
  11   2   0   31.27    4.36
  11   3   0    6.24    2.75
  11   3   0    5.70    3.58
  11   4   0    1.58    3.87
  11   5   0    6.61    4.60
  12  -5   0   12.15    6.19
  12  -4   0   47.34    6.49
  12  -3   0   55.71    6.73
  12  -2   0  336.71   17.37
  12  -1   0  859.29   41.11
  12   0   0  463.68   22.66
  12   1   0  751.09   36.68
  12   1   0  780.46   44.93
  12   2   0  303.51   15.53
  12   2   0  308.32   19.26
  12   3   0   40.34    6.09
  12   3   0   39.63    4.47
  12   4   0   36.30    5.54
  12   5   0    8.08    4.82
  13  -5   0   14.14    6.61
  13  -4   0   27.50    6.19
  13  -3   0   28.10    5.37
  13  -2   0   94.34    7.20
  13  -1   0  119.21    7.57
  13   1   0   97.78    6.77
  13   1   0   97.86    8.43
  13   2   0   64.44    7.12
  13   2   0   62.20    5.60
  13   3   0   38.25    5.61
  13   3   0   44.45    4.87
  13   4   0   18.82    5.24
  13   5   0   11.12    5.38
  14  -4   0   14.54    6.15
  14  -3   0   29.44    5.47
  14  -2   0   29.29    4.76
  14  -1   0  229.17   12.40
  14   0   0   31.68    4.13
  14   1   0  215.70   11.94
  14   2   0   26.64    5.08
  14   2   0   18.89    4.18
  14   3   0   27.11    4.21
  14   3   0   20.17    5.28
  14   4   0    7.64    5.27
  15  -4   0    0.31    6.36
  15  -3   0   12.82    5.46
  15  -2   0   44.02    5.51
  15  -1   0   55.33    6.05
  15   0   0    3.90    3.96
  15   1   0   60.44    6.02
  15   2   0   30.89    4.96
  15   2   0   37.00    5.95
  15   3   0    5.24    5.19
  15   4   0    0.95    5.54
  16  -3   0   33.34    6.27
  16  -2   0  220.01   12.88
  16  -1   0   -0.83    4.15
  16   0   0  198.64   11.47
  16   1   0   -2.19    4.40
  16   2   0  200.89   12.07
  16   3   0   34.18    6.73
  16   4   0   33.68    7.19
  17  -3   0   18.42    6.33
  17  -2   0   29.71    5.71
  17  -1   0    1.22    4.59
  17   0   0   63.53    6.65
  17   1   0   -2.43    4.75
  17   2   0   19.88    5.57
  17   3   0   17.50    6.77
  18  -2   0   58.90    7.06
  18  -1   0    8.80    5.21
  18   0   0   95.66    8.00
  18   1   0   30.55    5.74
  19   0   0   21.43    5.69
  19   1   0   30.11    6.21
  19   1   1   24.94    6.14
  19   0   1   13.21    5.53
  18   1   1   83.35    7.88
  18   0   1    2.39    4.92
  18  -1   1   94.81    8.27
  17   3   1   74.77   10.13
  17   1   1    0.22    4.89
  17   0   1    0.28    4.47
  17  -1   1    6.53    4.73
  17  -2   1    4.17    5.36
  16   4   1    0.55    6.18
  16   3   1   11.64    6.06
  16   2   1   93.45    8.00
  16   1   1    9.62    4.70
  16   0   1  264.90   14.37
  16  -1   1   11.39    4.46
  16  -2   1  104.95    8.45
  16  -3   1   10.27    5.98
  15   4   1    4.02    5.68
  15   3   1   -0.42    5.18
  15   2   1   64.75    8.24
  15   2   1   45.91    6.03
  15   1   1    2.55    4.15
  15   0   1   27.84    4.56
  15  -1   1    5.59    3.96
  15  -2   1   70.84    7.06
  15  -3   1   -1.53    5.29
  15  -4   1   -2.44    6.47
  14   4   1   10.56    5.47
  14   3   1  100.93    9.67
  14   2   1   47.98    6.22
  14   2   1   32.55    4.71
  14   1   1  274.10   14.58
  14   1   1  277.28   18.03
  14   0   1    0.36    3.55
  14  -1   1  267.04   14.13
  14  -2   1   42.18    5.20
  14  -3   1  102.26    8.85
  14  -4   1   11.48    6.28
  13   5   1   22.97    6.05
  13   4   1   20.89    5.51
  13   3   1    7.69    3.23
  13   3   1    3.65    4.54
  13   2   1   34.06    4.15
  13   2   1   46.12    6.61
  13   1   1    1.34    3.34
  13   1   1    2.67    3.77
  13   0   1   -1.38    3.13
  13  -1   1    4.57    3.33
  13  -2   1   51.01    5.82
  13  -3   1    3.38    4.81
  13  -4   1   23.18    6.21
  13  -5   1   23.51    7.09
  12   5   1    8.91    5.11
  12   4   1   58.97    7.27
  12   3   1   10.66    3.01
  12   3   1    6.54    4.22
  12   2   1  312.75   15.97
  12   2   1  316.79   19.86
  12   1   1  294.66   18.76
  12   1   1  304.28   15.26
  12   0   1  957.77   55.08
  12   0   1  934.38   45.05
  12  -1   1  303.90   15.49
  12  -2   1  360.06   18.54
  12  -3   1   20.38    4.88
  12  -4   1   72.54    8.19
  12  -5   1   12.63    6.60
  11   5   1    4.47    4.58
  11   4   1    5.48    4.27
  11   3   1   17.04    4.30
  11   3   1   21.13    3.07
  11   2   1  136.35    7.75
  11   2   1  138.49   10.04
  11   1   1    6.70    2.58
  11   1   1    5.84    3.06
  11   0   1    3.94    2.82
  11   0   1    3.67    2.47
  11  -1   1   12.42    2.86
  11  -2   1  192.24   11.03
  11  -3   1   26.81    4.85
  11  -4   1   10.54    5.19
  11  -5   1    3.55    5.91
  10   6   1   12.00    5.20
  10   5   1   12.62    4.55
  10   4   1  100.67    8.49
  10   3   1   19.79    3.97
  10   3   1   19.17    2.85
  10   2   1  332.65   20.73
  10   2   1  344.78   16.72
  10   1   1   47.39    4.00
  10   1   1   52.29    5.38
  10   0   1 1326.75   63.57
  10   0   1 1368.05   77.63
  10  -1   1   94.26    6.08
  10  -2   1  386.61   19.63
  10  -3   1   23.27    4.47
  10  -4   1  127.42    9.73
  10  -5   1   10.48    5.72
  10  -6   1   21.29    7.17
   9   6   1   17.12    5.11
   9   5   1    1.02    3.89
   9   4   1   30.98    4.57
   9   3   1   35.44    5.08
   9   3   1   37.82    3.66
   9   2   1   11.94    2.97
   9   2   1   12.62    2.15
   9   1   1  215.06   11.00
   9   1   1  220.15   13.66
   9   0   1  108.32    6.03
   9   0   1  101.81    7.38
   9  -1   1  215.42   11.36
   9  -1   1  222.52   13.39
   9  -2   1   12.41    3.09
   9  -3   1   56.45    6.31
   9  -4   1   31.25    5.36
   9  -5   1    3.00    5.19
   9  -6   1   10.67    6.75
   8   6   1   -2.22    4.34
   8   5   1   11.05    4.10
   8   4   1   47.87    5.60
   8   3   1  339.84   21.15
   8   3   1  355.42   17.01
   8   2   1  174.94   11.48
   8   2   1  179.38    9.07
   8   1   1 1115.47   65.28
   8   1   1 1148.51   53.36
   8   0   1   10.05    2.01
   8   0   1   10.18    1.80
   8  -1   1 1209.82   59.51
   8  -1   1 1307.45   72.25
   8  -2   1  214.94   11.71
   8  -3   1  471.30   23.94
   8  -4   1   58.72    6.73
   8  -5   1    7.01    4.97
   8  -6   1   -3.29    6.10
   7   6   1    6.61    4.48
   7   5   1    4.91    3.66
   7   4   1   15.66    3.49
   7   3   1   36.78    4.58
   7   2   1  237.22   11.81
   7   2   1  244.04   14.82
   7   1   1  306.23   14.68
   7   1   1  300.99   18.15
   7   0   1   19.37    2.39
   7   0   1   19.98    2.92
   7  -1   1  409.99   20.25
   7  -1   1  422.20   24.20
   7  -2   1  359.41   18.21
   7  -2   1  361.11   20.90
   7  -3   1   31.14    4.13
   7  -4   1   17.99    4.25
   7  -5   1    5.16    4.88
   7  -6   1    9.17    6.44
   7  -7   1    1.51    9.15
   6   7   1    1.52    4.95
   6   6   1   18.00    4.64
   6   5   1   46.07    5.79
   6   4   1   95.31    7.55
   6   3   1  321.24   19.46
   6   2   1  619.83   36.48
   6   2   1  632.44   29.67
   6   1   1 1057.30   48.47
   6   1   1 1002.74   59.30
   6   0   1 1872.62  111.58
   6   0   1 2029.70   91.50
   6  -1   1 1178.74   55.91
   6  -1   1 1185.52   67.72
   6  -2   1  571.82   27.93
   6  -3   1  372.94   19.23
   6  -4   1   86.59    7.36
   6  -5   1   42.40    5.99
   6  -6   1   26.79    7.01
   6  -7   1   -1.61    9.42
   5   7   1    9.27    5.20
   5   6   1    2.77    3.96
   5   5   1   55.17    6.02
   5   4   1  113.15    8.28
  -5  -3  -1  282.72   15.20
   5   3   1  252.44   16.37
  -5  -2  -1  536.03   28.67
   5   2   1  508.96   30.27
   5   2   1  509.15   24.58
   5   1   1  277.43   13.28
   5   1   1  275.71   16.44
   5   0   1  305.97   13.91
   5   0   1  271.22   16.90
   5  -1   1  277.97   16.29
   5  -1   1  282.43   13.91
   5  -2   1  569.74   27.79
   5  -3   1  282.87   15.64
   5  -3   1  312.54   17.83
   5  -4   1  113.83    8.19
   5  -5   1   60.49    7.24
   5  -6   1    3.58    6.54
   5  -7   1    7.32   10.38
   4   7   1    9.64    5.05
   4   6   1   25.86    4.89
   4   5   1   11.32    3.60
  -4  -4  -1    8.58    1.86
   4   4   1    7.90    2.77
   4   3   1  291.41   18.18
  -4  -3  -1  311.93   17.03
  -4  -2  -1  763.49   43.63
   4   2   1  814.33   37.27
   4   2   1  794.41   45.69
   4   1   1 2010.60  116.11
   4   1   1 2042.78   94.91
   4   0   1 3218.15  195.29
   4   0   1 3601.57  160.16
   4  -1   1 2052.78  116.89
   4  -1   1 2034.27   96.06
   4  -2   1  733.99   35.06
   4  -2   1  721.72   41.85
   4  -3   1  317.14   19.01
   4  -3   1  322.65   16.58
   4  -4   1    7.78    3.55
   4  -5   1   15.16    5.08
   4  -6   1   12.60    6.98
   4  -7   1   12.32   11.62
   3   7   1    1.76    4.78
   3   6   1    3.95    3.98
   3   5   1    5.05    3.24
   3   4   1   88.83    6.60
  -3  -4  -1   77.39    5.59
   3   3   1   65.27    5.59
  -3  -3  -1   80.39    4.82
   3   2   1  228.57   12.99
  -3  -2  -1  202.14   12.10
   3   1   1   40.56    3.16
   3   1   1   37.62    2.25
   3   0   1 2485.26  111.54
   3   0   1 2253.20  135.87
   3  -1   1   75.46    4.67
   3  -2   1  202.00   10.47
   3  -2   1  193.23   11.83
   3  -3   1   76.25    5.76
   3  -3   1   77.62    5.88
   3  -4   1   80.61    6.87
   3  -4   1   80.39    6.82
   3  -5   1   -6.92    4.72
   3  -6   1   -4.32    7.44
   3  -7   1   -5.82   12.59
   2   6   1    7.37    3.95
   2   5   1   40.06    5.11
  -2  -5  -1   37.70    4.73
   2   4   1   88.31    6.43
  -2  -4  -1   74.37    5.63
  -2  -3  -1  529.82   30.91
   2   3   1  581.46   32.44
  -2  -2  -1   49.83    3.24
   2   2   1   45.53    3.88
  -2  -1  -1 3641.47  218.80
   2   1   1 4115.18  186.48
   2   1   1 4166.33  228.07
   2   0   1  115.56    5.54
   2   0   1  108.96    6.65
   2  -1   1 3283.89  195.03
   2  -1   1 3535.83  160.29
   2  -2   1   48.47    3.90
   2  -3   1  497.12   29.21
   2  -4   1   77.92    7.06
   2  -5   1   34.57    6.62
   2  -5   1   47.36    7.00
   2  -6   1    6.06    9.25
   2  -7   1   23.02   17.28
   1   6   1   16.90    4.05
   1   5   1   65.66    6.00
   1   4   1   32.35    4.12
   1   3   1  169.04   10.57
   1   2   1  196.48   11.80
   1   1   1 1848.56  108.65
  -1  -1  -1 1935.49  104.39
   1   0   1  104.94    5.12
   1  -1   1 2003.13  114.67
   1  -2   1  176.60   10.82
   1  -4   1   40.83    6.39
   1  -5   1   95.42   11.45
   0   5   1   19.45    3.31
   0   4   1   64.21    5.31
   0   3   1   83.63    5.79
   0   2   1 2252.82  128.77
   0   1   1   45.44    3.04
   0   0   1  632.02   37.90
   0   0  -1  672.58   36.53
   0   2  -1 2103.75  120.47
   0   3  -1   78.94    5.42
   1  -6  -1   12.73    8.79
  -1   5   1    2.33    2.36
  -1   4   1   87.21    6.15
  -1   3   1   52.77    4.07
  -1   2   1  378.05   21.92
  -1   1   1  852.80   48.65
   1  -1  -1  841.87   39.99
   1   0  -1  309.91   14.89
   1   0  -1  318.84   17.59
  -1   0   1  310.35   18.33
   1   1  -1  818.68   46.96
   1   2  -1  370.69   21.60
   1   3  -1   48.69    4.03
   1   4  -1   93.02    6.69
  -1  -6   1   59.35   22.40
   2  -6  -1    1.38    7.31
   2  -5  -1   69.22    7.87
   2  -4  -1   32.65    4.08
  -2   4   1   24.89    3.11
  -2   3   1  413.76   22.96
   2  -3  -1  373.25   19.55
  -2   2   1  313.83   18.55
   2  -2  -1  327.64   15.82
  -2   1   1 1863.39  102.71
   2  -1  -1 1692.85   83.42
   2   0  -1  292.12   13.38
   2   0  -1  274.33   16.38
   2   1  -1 1898.70  105.44
   2   1  -1 1771.79   86.04
   2   2  -1  325.92   19.15
   2   3  -1  428.30   25.18
   2   4  -1   29.05    4.03
   2   5  -1   42.36    5.16
   3  -6  -1    3.85    6.44
   3  -5  -1   21.04    4.90
   3  -4  -1  158.60   10.19
   3  -4  -1  112.11    8.44
   3  -3  -1   22.32    2.95
   3  -2  -1  102.87    6.51
   3  -2  -1  106.23    6.12
   3  -1  -1 1210.20   56.96
   3   0  -1  692.56   31.89
   3   0  -1  664.40   38.97
   3   1  -1 1001.84   47.97
   3   1  -1 1041.79   58.63
   3   2  -1  112.56    7.26
   3   3  -1   25.52    3.49
   3   4  -1  112.43    8.02
   3   5  -1   26.51    4.00
   3   6  -1    6.95    4.02
   4  -6  -1   38.81    7.25
   4  -5  -1   14.89    4.41
   4  -4  -1   37.90    4.83
   4  -3  -1  220.36   11.48
   4  -3  -1  205.10   12.84
   4  -2  -1  179.59   10.85
   4  -2  -1  188.66    9.75
   4  -1  -1 2475.85  116.08
   4   0  -1 4455.34  261.25
   4   0  -1 4665.94  214.06
   4   1  -1 2339.11  109.50
   4   1  -1 2333.05  133.69
  -4  -2   1  180.91   10.30
   4   2  -1  186.91   11.30
  -4  -3   1  219.05   13.12
   4   3  -1  247.22   14.36
   4   4  -1   34.40    4.64
   4   5  -1   19.46    3.80
   4   6  -1   37.90    5.99
   5  -6  -1    0.50    5.74
   5  -5  -1   25.22    4.88
   5  -4  -1  146.00    9.22
   5  -3  -1    9.45    2.64
   5  -3  -1    5.84    1.85
   5  -2  -1  889.00   42.45
   5  -1  -1   87.32    4.92
   5   0  -1  125.88    6.15
   5   0  -1  121.68    7.54
   5   1  -1  111.30    5.84
   5   1  -1  120.50    7.39
   5   2  -1  849.94   47.47
   5   2  -1  791.62   38.72
  -5  -3   1    6.38    1.24
   5   3  -1   12.42    2.44
   5   4  -1  151.14   10.26
   5   5  -1   24.40    4.16
   5   6  -1   11.21    4.46
   6  -6  -1    6.52    5.86
   6  -5  -1   31.36    5.16
   6  -4  -1   47.50    5.67
   6  -3  -1   11.92    2.90
   6  -2  -1 1888.07   89.08
   6  -1  -1  548.37   25.88
   6  -1  -1  535.29   31.16
   6   0  -1  822.73   38.55
   6   0  -1  812.84   47.02
   6   1  -1  496.06   28.27
   6   1  -1  474.20   23.03
   6   2  -1 1644.48   78.07
   6   2  -1 1681.62   95.47
   6   3  -1    6.50    2.36
   6   4  -1   61.02    5.99
   6   5  -1   24.19    4.26
   6   6  -1    5.39    4.21
   7  -7  -1    0.23    8.43
   7  -6  -1   10.26    6.04
   7  -5  -1    0.88    4.31
   7  -4  -1   89.02    7.29
   7  -3  -1  135.67    8.55
   7  -2  -1  706.89   34.03
   7  -1  -1 1005.18   47.26
   7  -1  -1  993.81   57.30
   7   0  -1  761.47   45.10
   7   0  -1  805.27   37.00
   7   1  -1  774.48   35.93
   7   1  -1  745.92   43.97
   7   2  -1  425.92   25.11
   7   2  -1  423.14   20.38
   7   3  -1  114.35    8.15
   7   4  -1   76.04    6.63
   7   5  -1    5.88    3.67
   7   6  -1   11.23    4.56
   7   7  -1   -1.23    5.00
   8  -7  -1    2.74    8.26
   8  -6  -1    5.78    5.96
   8  -5  -1   44.22    6.03
   8  -4  -1   18.83    4.30
   8  -3  -1   32.71    4.09
   8  -2  -1   20.66    2.98
   8  -1  -1 1920.44  110.34
   8  -1  -1 1938.21   90.69
   8   0  -1   73.31    4.37
   8   0  -1   71.95    5.26
   8   1  -1 1830.38   84.07
   8   1  -1 1749.90  102.67
   8   2  -1   24.68    3.98
   8   2  -1   27.01    2.86
   8   3  -1   30.17    3.32
   8   3  -1   28.67    4.45
   8   4  -1   19.69    3.79
   8   5  -1   38.14    5.65
   8   6  -1    4.78    4.48
   9  -6  -1    4.17    6.02
   9  -5  -1   35.07    5.85
   9  -4  -1   48.74    6.43
   9  -3  -1  255.76   14.03
   9  -2  -1   89.61    6.10
   9  -1  -1  289.73   14.22
   9  -1  -1  280.90   16.85
   9   0  -1  143.19    9.31
   9   0  -1  148.42    7.70
   9   1  -1  367.41   21.91
   9   1  -1  367.40   17.83
   9   2  -1   70.59    6.09
   9   2  -1   72.32    4.59
   9   3  -1  190.06    9.81
   9   3  -1  182.18   12.30
   9   4  -1   31.62    4.45
   9   5  -1   24.32    4.64
   9   6  -1    1.81    4.53
  10  -6  -1    3.76    6.29
  10  -5  -1   28.08    5.97
  10  -4  -1   50.60    6.64
  10  -3  -1   61.25    6.32
  10  -2  -1  288.57   14.96
  10  -1  -1  347.32   17.15
  10   0  -1  115.44    8.01
  10   0  -1  120.03    6.68
  10   1  -1  281.40   13.88
  10   1  -1  274.83   17.01
  10   2  -1  266.95   13.40
  10   2  -1  267.99   16.66
  10   3  -1   41.11    5.35
  10   3  -1   45.33    4.02
  10   4  -1   34.24    4.85
  10   5  -1   31.11    5.16
  10   6  -1    3.72    4.66
  11  -6  -1    7.91    6.74
  11  -5  -1   14.66    5.75
  11  -4  -1   56.09    7.13
  11  -3  -1   50.84    6.12
  11  -2  -1  458.27   22.80
  11  -1  -1  141.18    8.01
  11   0  -1  660.65   38.45
  11   0  -1  657.17   31.56
  11   1  -1  137.38    9.57
  11   1  -1  135.43    7.64
  11   2  -1  310.34   15.50
  11   2  -1  309.39   19.20
  11   3  -1   36.66    4.15
  11   3  -1   36.39    5.52
  11   4  -1   27.45    4.77
  11   5  -1   10.94    4.66
  11   6  -1    8.31    5.18
  12  -5  -1    6.39    5.87
  12  -4  -1   80.31    8.05
  12  -3  -1   34.73    5.11
  12  -2  -1  171.80    9.97
  12  -1  -1   46.15    4.66
  12   0  -1  143.13    8.18
  12   1  -1   27.62    4.04
  12   1  -1   31.22    3.45
  12   2  -1  149.57    8.53
  12   2  -1  145.89   10.58
  12   3  -1   13.74    4.21
  12   3  -1   16.84    3.28
  12   4  -1   37.63    5.61
  12   5  -1    7.26    4.70
  13  -5  -1    9.85    6.33
  13  -4  -1   11.50    5.57
  13  -3  -1  229.58   13.35
  13  -2  -1   25.84    4.19
  13  -1  -1   72.70    5.76
  13   0  -1  181.64   10.06
  13   1  -1   41.58    4.65
  13   1  -1   44.17    6.02
  13   2  -1   22.10    3.65
  13   2  -1   26.24    4.49
  13   3  -1  177.67   12.57
  13   4  -1    8.65    4.80
  13   5  -1   11.82    5.41
  14  -5  -1   -2.92    6.46
  14  -4  -1   97.13    9.26
  14  -3  -1   33.38    5.59
  14  -2  -1   15.41    4.22
  14  -1  -1   57.86    5.61
  14   0  -1   20.49    3.83
  14   1  -1   40.67    4.58
  14   2  -1   13.05    3.96
  14   2  -1   20.43    4.67
  14   3  -1   47.49    5.30
  14   3  -1   35.77    5.90
  14   4  -1   73.81    8.40
  14   5  -1    0.56    5.38
  15  -4  -1    2.75    6.07
  15  -3  -1  114.09    9.23
  15  -2  -1   46.19    5.45
  15  -1  -1   95.53    7.17
  15   0  -1  236.12   12.86
  15   1  -1   83.37    6.67
  15   2  -1   14.32    4.32
  15   2  -1   23.82    5.08
  15   3  -1   82.37    7.05
  15   3  -1   89.22    8.98
  15   4  -1    6.19    5.50
  16  -3  -1   21.39    5.77
  16  -2  -1   40.02    5.66
  16  -1  -1   27.72    4.77
  16   0  -1  113.47    8.12
  16   1  -1   29.70    4.89
  16   2  -1   24.50    5.11
  16   3  -1   19.23    5.85
  16   3  -1    7.82    4.47
  16   4  -1   10.32    6.02
  17  -3  -1   29.02    6.65
  17  -2  -1  109.23    8.72
  17  -1  -1   17.96    4.94
  17   0  -1   93.17    7.71
  17   1  -1   21.48    5.04
  17   2  -1   86.79    8.12
  17   3  -1   29.68    6.94
  18  -2  -1   18.19    5.94
  18  -1  -1   21.87    5.61
  18   0  -1   18.35    5.17
  18   1  -1   23.76    5.63
  18   2  -1    7.58    5.48
  19   0  -1   -1.45    5.16
  19   1  -1   38.53    6.33
  19   2  -1    6.31    6.07
  18   0   2   -1.43    4.97
  18  -1   2   96.76    8.37
  17   3   2   -0.86    6.74
  17   1   2   38.92    5.89
  17   0   2    2.43    4.60
  17  -1   2   38.00    5.55
  17  -2   2    9.75    5.40
  16   3   2    6.05    6.32
  16   1   2    2.05    4.61
  16   0   2  178.09   10.82
  16  -1   2    2.58    4.30
  16  -2   2   59.30    7.07
  16  -3   2   -0.90    5.79
  15   4   2    9.42    6.29
  15   3   2   11.30    6.00
  15   2   2   25.48    6.19
  15   1   2   12.84    4.41
  15   0   2    9.99    4.15
  15  -1   2   17.35    4.34
  15  -2   2   33.09    5.35
  15  -3   2   11.28    5.78
  15  -4   2    5.17    6.91
  14   4   2    0.88    5.57
  14   3   2  175.10   13.43
  14   2   2   41.83    5.16
  14   2   2   65.18    7.92
  14   1   2  114.43   10.21
  14   1   2  124.43    8.11
  14   0   2  305.41   15.81
  14  -1   2  106.69    7.40
  14  -2   2   68.14    6.70
  14  -4   2    2.91    6.19
  13   5   2   11.03    5.71
  13   4   2   -0.57    5.06
  13   3   2   94.73    9.07
  13   2   2   10.70    3.67
  13   2   2   24.62    5.14
  13   1   2   85.36    6.45
  13   1   2   84.61    8.22
  13   0   2   15.24    3.49
  13  -1   2   88.39    6.50
  13  -2   2   19.13    4.39
  13  -3   2  115.78    9.18
  13  -4   2   -0.63    5.98
  13  -5   2    4.76    7.02
  12   5   2    7.52    5.19
  12   4   2   -0.02    4.61
  12   3   2   34.68    5.55
  12   2   2  199.85   12.95
  12   2   2  168.28    9.97
  12   1   2   62.11    6.95
  12   1   2   56.05    5.22
  12   0   2   22.32    3.33
  12   0   2   21.22    4.14
  12  -1   2   40.22    4.68
  12  -2   2  270.98   14.62
  12  -3   2   39.97    5.74
  12  -4   2    3.20    5.56
  12  -5   2    7.27    6.55
  11   5   2   28.70    5.62
  11   4   2    8.66    4.53
  11   3   2   19.03    4.56
  11   3   2   20.90    3.01
  11   2   2   34.05    4.81
  11   2   2   31.93    3.98
  11   1   2   30.09    4.29
  11   1   2   25.45    3.33
  11   0   2  356.77   17.81
  11   0   2  363.75   21.95
  11  -1   2   27.72    3.41
  11  -2   2   55.33    5.93
  11  -3   2   15.78    4.74
  11  -4   2   15.55    5.48
  11  -5   2   21.81    6.62
  10   6   2    1.74    4.95
  10   5   2   17.57    4.94
  10   4   2   50.23    6.37
  10   3   2  131.26   10.00
  10   3   2  140.47    7.74
  10   2   2  441.59   26.20
  10   2   2  425.24   21.04
  10   1   2   58.17    4.42
  10   1   2   59.27    6.11
  10   0   2  449.91   26.65
  10   0   2  445.52   21.73
  10  -1   2   60.52    5.74
  10  -1   2   60.85    4.92
  10  -2   2  525.23   26.06
  10  -3   2  163.13   10.56
  10  -4   2   63.95    7.61
  10  -5   2   16.56    5.97
  10  -6   2    2.82    7.03
   9   6   2    2.74    4.69
   9   5   2   11.69    4.42
   9   4   2   44.02    5.95
   9   3   2   26.03    4.20
   9   3   2   36.10    3.55
   9   2   2  470.35   28.22
   9   2   2  474.91   22.75
   9   1   2  108.24    7.80
   9   1   2  101.73    6.06
   9   0   2   87.22    5.19
   9   0   2   77.42    6.44
   9  -1   2  182.03   11.08
   9  -1   2  164.89    9.41
   9  -2   2  627.58   30.74
   9  -3   2   34.54    4.83
   9  -4   2   67.67    7.49
   9  -5   2    8.93    5.65
   9  -6   2   -1.83    6.68
   8   6   2    3.56    4.63
   8   5   2   12.42    4.25
   8   4   2    9.43    3.49
   8   3   2   79.59    6.90
   8   3   2   84.62    5.12
   8   2   2  141.58    9.65
   8   2   2  141.98    7.46
   8   1   2  736.01   35.03
   8   1   2  741.64   43.00
   8   0   2    8.59    1.86
   8   0   2    9.32    2.22
   8  -1   2  827.63   41.06
   8  -1   2  895.79   49.74
   8  -2   2  155.90    9.22
   8  -3   2   92.43    7.47
   8  -4   2   17.61    4.66
   8  -5   2   18.33    5.59
   8  -6   2    3.99    6.45
   7   6   2    7.93    4.62
   7   5   2   57.33    6.41
   7   4   2   18.24    3.68
   7   3   2  106.51    5.96
   7   3   2  104.25    7.88
   7   2   2   36.70    4.38
   7   2   2   41.93    2.96
   7   1   2    8.81    1.56
   7   1   2    6.74    2.09
   7   0   2  442.48   20.30
   7   0   2  402.41   24.74
   7  -1   2   47.37    3.90
   7  -1   2   43.30    3.95
   7  -2   2   45.46    3.65
   7  -2   2   47.94    4.79
   7  -3   2  151.48    9.60
   7  -4   2   16.54    4.40
   7  -5   2   72.31    8.14
   7  -6   2    5.53    6.73
   6   7   2   11.68    5.38
   6   6   2    4.65    4.37
   6   5   2    3.27    3.59
   6   4   2   80.86    6.92
   6   3   2   20.02    3.08
   6   2   2  551.35   26.67
   6   2   2  574.12   32.93
   6   1   2  405.80   18.39
   6   1   2  363.30   22.61
   6   0   2  946.25   55.97
   6   0   2 1001.46   45.91
   6  -1   2  396.74   19.86
   6  -1   2  417.04   23.63
   6  -2   2  551.17   28.06
   6  -2   2  594.85   33.04
   6  -3   2   24.63    3.82
   6  -4   2   71.92    6.98
   6  -5   2   -1.21    4.75
   6  -6   2    0.21    6.67
   6  -7   2   11.48   10.66
   5   7   2    7.42    5.21
   5   6   2   11.65    4.42
   5   5   2    3.84    3.47
   5   4   2  169.08   11.29
  -5  -3  -2   49.57    3.62
   5   3   2   41.10    4.64
  -5  -2  -2  348.35   19.03
   5   2   2  343.63   16.34
   5   2   2  331.69   20.28
   5   1   2  282.46   17.00
   5   1   2  291.10   13.72
   5   0   2 1359.55   61.15
   5   0   2 1242.89   74.53
   5  -1   2  295.97   14.71
   5  -1   2  296.21   17.19
   5  -2   2  379.79   19.49
   5  -2   2  396.66   22.53
   5  -3   2   43.62    5.15
   5  -3   2   53.27    4.56
   5  -4   2  209.34   12.43
   5  -5   2    2.75    4.62
   5  -6   2   11.99    7.01
   5  -7   2   11.91   11.55
   4   7   2    5.60    4.90
   4   6   2   15.93    4.52
   4   5   2    7.09    3.47
   4   4   2   47.14    5.23
  -4  -4  -2   54.06    4.09
  -4  -3  -2  230.67   13.05
   4   3   2  224.81   14.08
   4   2   2   69.53    5.26
   4   2   2   71.05    3.91
   4   1   2  129.78    6.18
   4   1   2  120.79    7.82
   4   0   2  624.53   37.38
   4   0   2  675.50   30.72
   4  -1   2  153.35    8.82
   4  -1   2  144.60    7.96
   4  -2   2   40.08    4.00
   4  -2   2   43.96    3.39
   4  -3   2  232.34   14.37
   4  -3   2  240.18   12.84
   4  -4   2   50.25    6.25
   4  -4   2   52.48    5.39
   4  -5   2   -3.01    4.92
   4  -6   2   15.41    7.94
   4  -7   2   19.05   12.98
   3   7   2   12.66    5.06
   3   6   2    0.24    3.93
   3   5   2   49.16    5.71
  -3  -4  -2   21.65    2.96
   3   4   2   33.35    4.37
   3   3   2  105.46    7.27
  -3  -3  -2  102.65    6.43
   3   2   2   14.44    2.00
   3   1   2  955.31   44.00
   3   1   2  919.40   53.81
   3   0   2    7.91    1.16
   3   0   2    9.58    1.09
   3  -1   2 1092.70   61.34
   3  -1   2 1050.70   50.73
   3  -2   2    4.32    1.55
   3  -2   2    5.06    2.06
   3  -3   2   92.58    6.74
   3  -3   2   98.13    6.82
   3  -4   2   27.35    3.73
   3  -4   2   25.69    4.52
   3  -5   2   58.53    7.48
   3  -6   2   -3.85    8.10
   3  -7   2   38.11   16.34
   2   6   2   35.64    5.02
  -2  -5  -2   52.06    5.10
   2   5   2   53.50    5.67
  -2  -4  -2  100.21    6.38
   2   4   2   89.33    7.06
  -2  -3  -2   54.52    4.00
   2   3   2   57.42    4.79
  -2  -2  -2   24.21    2.21
   2   1   2 3210.59  186.97
  -2  -1  -2 3410.70  179.55
   2   1   2 3156.52  152.87
   2   0   2  339.06   19.22
   2   0   2  326.58   15.85
   2  -1   2 3229.04  183.83
   2  -1   2 3198.86  151.02
   2  -2   2   23.37    2.92
   2  -3   2   46.11    4.47
   2  -4   2  107.16    8.33
   2  -5   2   50.81    6.72
   2  -6   2   69.45   12.27
   2  -7   2   16.52   20.57
   1   6   2   42.64    5.79
   1   5   2   34.72    4.98
  -1  -5  -2   46.34    4.91
   1   4   2   89.44    7.17
  -1  -4  -2  109.14    6.82
   1   3   2  497.05   29.71
  -1  -3  -2  520.29   28.47
   1   2   2  412.73   23.68
  -1  -2  -2  399.96   22.66
   1   1   2 4727.31  266.45
  -1  -1  -2 4572.48  256.15
   1   0   2   79.89    4.38
   1   0   2   65.45    3.74
   1  -1   2 4598.46  263.13
   1  -2   2  393.76   23.14
   1  -3   2  496.16   29.30
   1  -4   2  103.22    8.62
   1  -5   2   50.72    7.42
   1  -7   2   20.48   32.71
   0  -6  -2   38.76    5.61
   0   5   2   18.19    3.34
   0   4   2   30.22    4.07
   0   3   2  118.39    7.72
   0   2   2  108.15    6.83
   0   1   2 1945.92  115.47
   0  -1  -2 2078.01  111.10
   0   0   2  154.94    9.13
   0  -1   2 2135.11  122.21
   0  -2   2  110.16    7.37
   0  -3   2  107.81    7.95
   0  -4   2   32.85    5.13
   0  -5   2   37.72    7.71
   0  -6   2   59.93   15.24
   1  -5  -2    2.24    4.55
  -1   5   2    4.41    2.56
  -1   4   2  164.11   10.43
  -1   3   2   48.19    3.97
  -1   2   2  928.15   53.28
   1  -1  -2   26.63    2.07
  -1   1   2   31.00    2.10
   1   0  -2   14.38    0.99
  -1   0   2   13.43    1.42
  -1  -1   2   28.15    3.00
   1   2  -2  878.73   50.53
   1   3  -2   45.31    3.91
  -1  -5   2   13.28    7.92
  -1  -6   2   38.53   16.87
   2  -5  -2   30.25    5.29
  -2   5   2   24.37    3.69
   2  -4  -2    9.68    3.18
  -2   4   2    8.33    2.03
   2  -3  -2   33.94    3.96
  -2   3   2   46.48    3.55
  -2   2   2  243.39   13.47
   2  -2  -2  214.09   11.52
  -2   1   2 1459.43   79.46
   2  -1  -2 1298.81   64.71
   2   0  -2  485.96   22.43
  -2   0   2  470.78   27.53
   2   0  -2  472.93   26.38
   2   1  -2 1489.19   85.46
   2   2  -2  226.88   13.52
   2   3  -2   39.75    3.80
   2   4  -2   10.54    2.55
  -2  -6   2  190.63   27.69
   3  -5  -2   78.48    7.31
   3  -4  -2   20.41    3.45
  -3   4   2   17.77    2.20
  -3   3   2  919.82   54.81
   3  -3  -2  993.89   45.73
  -3   2   2    1.47    0.76
   3  -2  -2   -0.24    1.42
   3  -1  -2 1997.81   93.76
   3   0  -2   93.19    5.72
   3   0  -2   96.88    4.70
   3   1  -2 1733.79   99.80
   3   1  -2 1740.78   81.48
   3   2  -2    0.54    1.29
   3   3  -2  993.72   57.35
   3   4  -2   20.55    3.06
   3   5  -2   78.23    6.85
  -3  -7   2   79.49   52.88
   4  -6  -2    6.55    5.75
   4  -5  -2   26.76    4.69
   4  -4  -2   65.05    5.79
   4  -3  -2   15.27    2.65
   4  -2  -2  157.53    8.45
   4  -1  -2 1259.03   59.19
   4   0  -2   70.80    4.64
   4   0  -2   74.37    3.81
   4   1  -2 1142.80   53.23
   4   1  -2 1123.34   65.01
   4   2  -2  165.39   10.25
   4   3  -2   22.87    3.64
   4   4  -2   64.55    5.72
   4   5  -2   29.70    4.31
  -4  -7   2   40.44   35.72
   5  -6  -2   44.17    7.13
   5  -5  -2    4.30    4.04
   5  -4  -2   43.65    5.18
   5  -3  -2  698.24   40.79
   5  -3  -2  716.51   34.28
   5  -2  -2  176.68    9.34
   5  -1  -2  256.22   12.47
   5   0  -2  903.62   41.97
   5   0  -2  881.98   51.20
   5   1  -2  122.62    7.78
   5   1  -2  124.38    6.25
   5   2  -2  182.17    9.27
   5   2  -2  190.81   11.55
   5   3  -2  651.09   38.57
  -5  -3   2  670.38   36.53
   5   4  -2   29.24    3.81
   5   5  -2   12.29    3.62
   5   6  -2   37.50    5.56
  -5  -7   2   33.41   26.08
   6  -6  -2    4.73    5.68
   6  -5  -2   13.89    4.39
   6  -4  -2   35.67    4.47
   6  -3  -2   33.62    4.37
   6  -2  -2  118.42    6.90
   6  -1  -2 1094.90   51.60
   6   0  -2  236.69   11.33
   6   0  -2  228.43   13.80
   6   1  -2  932.05   45.58
   6   1  -2 1004.76   55.76
   6   2  -2  123.92    8.44
   6   2  -2  130.21    6.67
   6   3  -2   36.65    4.28
   6   4  -2   23.75    3.68
   6   5  -2    9.88    3.64
   6   6  -2    9.50    4.36
   7  -6  -2   29.55    6.43
   7  -5  -2   28.72    5.15
   7  -4  -2  168.82   10.39
   7  -3  -2  234.42   12.69
   7  -2  -2  402.41   19.81
   7  -1  -2   10.76    1.65
   7   0  -2 1827.73  104.06
   7   0  -2 1809.27   85.28
   7   1  -2   28.94    2.55
   7   1  -2   30.70    3.41
   7   2  -2  329.73   19.50
   7   2  -2  320.08   15.76
   7   3  -2  154.76   10.30
   7   4  -2  111.63    8.40
   7   5  -2   31.21    4.69
   7   6  -2   24.48    5.14
   8  -6  -2    5.20    5.76
   8  -5  -2   36.82    5.69
   8  -4  -2    8.14    3.82
   8  -3  -2  190.06   10.87
   8  -2  -2   86.91    5.84
   8  -1  -2  360.15   17.50
   8   0  -2  349.28   16.85
   8   0  -2  349.05   20.51
   8   1  -2  284.60   17.21
   8   1  -2  289.22   14.01
   8   2  -2   48.41    3.59
   8   2  -2   52.89    4.80
   8   3  -2  145.23    7.79
   8   3  -2  139.84    9.83
   8   4  -2   12.54    3.41
   8   5  -2   35.62    4.99
   8   6  -2    7.60    4.50
   9  -6  -2   -3.55    5.74
   9  -5  -2   17.88    5.14
   9  -4  -2   92.58    7.71
   9  -3  -2  215.12   12.10
   9  -2  -2  117.07    7.18
   9  -1  -2  558.30   32.64
   9  -1  -2  572.25   27.11
   9   0  -2   54.02    3.87
   9   0  -2   57.11    4.62
   9   1  -2  487.17   28.67
   9   1  -2  487.90   23.41
   9   2  -2   93.84    7.00
   9   2  -2   89.60    5.50
   9   3  -2  149.75   10.70
   9   3  -2  163.10    8.53
   9   4  -2   65.57    6.53
   9   5  -2   12.15    4.14
   9   6  -2   -0.12    4.49
  10  -6  -2    2.67    6.25
  10  -5  -2   24.66    5.76
  10  -4  -2   59.22    6.89
  10  -3  -2   32.23    4.43
  10  -2  -2    5.42    2.72
  10  -1  -2   52.46    4.04
  10   0  -2    2.77    1.89
  10   0  -2    1.39    1.87
  10   1  -2   47.61    3.86
  10   1  -2   49.26    4.89
  10   2  -2    1.55    2.05
  10   2  -2    2.33    2.61
  10   3  -2   19.58    2.92
  10   3  -2   20.06    3.73
  10   4  -2   28.30    4.49
  10   5  -2   21.22    4.73
  10   6  -2    5.59    4.75
  11  -6  -2    6.46    6.68
  11  -5  -2   16.83    5.73
  11  -4  -2  203.91   12.47
  11  -3  -2   25.70    4.37
  11  -2  -2  645.94   31.36
  11  -1  -2   80.62    5.32
  11   0  -2  694.76   34.20
  11   0  -2  738.55   41.69
  11   1  -2   60.82    5.66
  11   1  -2   60.40    4.57
  11   2  -2  455.65   22.11
  11   2  -2  449.29   27.12
  11   3  -2   17.94    3.89
  11   3  -2   19.11    3.05
  11   4  -2  163.07   11.59
  11   5  -2   18.04    4.78
  11   6  -2    8.73    5.14
  12  -6  -2   -0.73    6.62
  12  -5  -2   26.70    6.28
  12  -4  -2   16.56    5.18
  12  -3  -2   32.58    4.86
  12  -2  -2   61.01    5.63
  12  -1  -2   36.65    4.22
  12   0  -2  249.38   12.81
  12   1  -2   35.73    5.11
  12   1  -2   32.26    4.20
  12   2  -2   46.89    5.80
  12   2  -2   48.06    4.50
  12   3  -2   20.07    3.35
  12   3  -2   22.11    4.33
  12   4  -2   16.73    4.65
  12   5  -2   25.22    5.30
  13  -5  -2    5.34    6.02
  13  -4  -2   15.60    5.49
  13  -3  -2   88.21    7.55
  13  -2  -2   84.94    6.63
  13  -1  -2  410.01   20.37
  13   0  -2   80.29    5.86
  13   1  -2  455.28   22.83
  13   1  -2  473.82   27.92
  13   2  -2   38.93    5.96
  13   2  -2   42.56    4.69
  13   3  -2   61.13    7.07
  13   3  -2   65.55    5.48
  13   4  -2   13.76    4.74
  13   5  -2    0.51    4.89
  14  -5  -2    3.05    6.33
  14  -4  -2   23.85    6.15
  14  -3  -2    1.67    4.75
  14  -2  -2    5.61    3.80
  14  -1  -2   58.36    5.56
  14   0  -2    4.81    3.30
  14   1  -2   49.54    5.16
  14   2  -2    0.11    3.51
  14   2  -2    1.53    3.91
  14   3  -2    0.78    4.34
  14   3  -2    5.91    3.68
  14   4  -2   10.01    5.01
  14   4  -2   20.54    4.04
  14   5  -2    3.57    5.18
  15  -4  -2   30.43    6.64
  15  -3  -2  134.87    9.69
  15  -2  -2   79.92    7.02
  15  -1  -2  202.69   11.48
  15   0  -2   39.38    5.17
  15   1  -2  160.87    9.74
  15   2  -2   53.02    5.87
  15   2  -2   60.50    7.31
  15   3  -2  106.96    9.69
  15   3  -2  106.23    7.86
  15   4  -2   29.09    6.21
  16  -4  -2   35.55    7.15
  16  -3  -2   11.47    5.60
  16  -2  -2   10.22    4.79
  16  -1  -2    4.88    4.15
  16   0  -2    9.89    4.16
  16   1  -2    2.13    4.14
  16   2  -2    6.53    4.50
  16   3  -2    3.64    5.34
  16   3  -2    3.33    4.42
  16   4  -2   29.68    6.49
  17  -3  -2    3.96    5.52
  17  -2  -2   52.10    6.28
  17  -1  -2    3.14    4.61
  17   0  -2  137.46    9.13
  17   1  -2    3.94    4.57
  17   2  -2   24.91    5.33
  17   3  -2   -2.92    4.83
  17   3  -2   -1.61    5.58
  18  -2  -2   37.02    6.35
  18  -1  -2   29.11    5.70
  18   0  -2   12.33    4.96
  18   1  -2   21.99    5.42
  18   2  -2   40.96    6.37
  19  -1  -2   98.99    8.71
  19   0  -2    4.15    5.22
  19   1  -2   86.85    8.52
  19   2  -2   37.65    6.78
  18   0   3    0.06    5.02
  18  -1   3    6.00    5.17
  17   3   3    6.97    7.32
  17   0   3   47.15    5.76
  17  -1   3   32.59    5.43
  17  -2   3    5.73    5.47
  16   3   3   31.62    7.50
  16   1   3   34.58    5.42
  16   0   3    9.88    4.46
  16  -1   3   25.45    4.92
  16  -2   3   46.53    6.08
  16  -3   3   26.40    6.69
  15   4   3   27.61    7.28
  15   3   3    1.23    5.93
  15   2   3  110.68   10.83
  15   1   3   17.53    4.67
  15   0   3  123.23    8.24
  15  -1   3   17.38    4.36
  15  -2   3   91.77    7.97
  15  -3   3    3.14    5.70
  14   4   3    7.29    6.01
  14   3   3   12.17    5.80
  14   2   3    4.20    5.27
  14   1   3   12.46    5.16
  14   1   3    8.94    3.99
  14   0   3   19.30    3.98
  14  -1   3   17.80    4.06
  14  -2   3   12.80    4.60
  14  -3   3   16.94    5.72
  14  -4   3   15.47    6.93
  13   4   3   -0.46    5.20
  13   3   3   79.90    8.69
  13   2   3   -7.81    3.18
  13   2   3    0.64    4.57
  13   1   3  409.05   24.66
  13   1   3  377.94   19.73
  13   0   3   42.36    4.90
  13  -1   3  415.49   20.76
  13  -2   3    5.12    4.12
  13  -3   3  129.43    9.96
  13  -4   3    2.75    6.25
  12   5   3    9.64    5.65
  12   4   3   13.31    5.27
  12   3   3   49.25    7.15
  12   2   3    5.05    3.08
  12   2   3   12.49    4.58
  12   1   3  201.15   13.48
  12   1   3  182.54   10.37
  12   0   3  142.53   10.47
  12   0   3  132.45    8.05
  12  -1   3  191.14   10.61
  12  -2   3   20.58    4.26
  12  -3   3   69.38    7.91
  12  -4   3   11.71    6.03
  12  -5   3   15.47    7.20
  11   5   3    5.56    5.09
  11   4   3   18.45    5.13
  11   3   3  146.89   11.02
  11   2   3  212.24   13.55
  11   2   3  181.73   10.29
  11   1   3   28.84    3.48
  11   1   3   32.67    4.67
  11   0   3   27.71    3.36
  11   0   3   28.66    4.32
  11  -1   3   60.16    5.13
  11  -2   3  192.05   11.19
  11  -3   3  181.95   11.66
  11  -4   3   36.60    6.41
  11  -5   3    1.04    6.33
  10   5   3    1.26    4.55
  10   4   3    1.08    4.09
  10   3   3   20.14    4.34
  10   2   3   19.80    2.70
  10   2   3   20.28    4.08
  10   1   3    4.22    2.35
  10   1   3    8.70    3.37
  10   0   3   40.42    3.96
  10   0   3   38.64    5.40
  10  -1   3    9.41    3.03
  10  -1   3    8.73    2.81
  10  -2   3   14.17    3.67
  10  -3   3   22.01    4.79
  10  -4   3    6.92    5.11
  10  -5   3    5.63    6.02
  10  -6   3   12.35    7.60
   9   6   3    4.65    4.96
   9   5   3    5.09    4.36
   9   4   3   36.14    5.74
   9   3   3  171.95    8.87
   9   3   3  161.72   11.53
   9   2   3  249.62   12.74
   9   2   3  264.44   16.30
   9   1   3  179.31    9.50
   9   1   3  185.90   12.00
   9   0   3  805.47   38.54
   9   0   3  816.87   47.18
   9  -1   3  258.20   14.89
   9  -1   3  221.13   12.40
   9  -2   3  389.08   19.83
   9  -3   3  235.64   13.66
   9  -4   3   42.12    6.03
   9  -5   3   10.76    5.91
   9  -6   3    0.72    7.04
   8   6   3    7.38    4.78
   8   5   3    7.09    4.21
   8   4   3    5.57    3.50
   8   3   3   33.33    3.29
   8   3   3   31.12    4.27
   8   2   3   43.49    3.26
   8   2   3   43.41    5.20
   8   1   3    6.98    2.60
   8   1   3    9.46    1.93
   8   0   3   97.47    7.13
   8   0   3   93.56    5.53
   8  -1   3   10.79    2.39
   8  -1   3    9.78    2.37
   8  -2   3   53.34    4.47
   8  -2   3   48.35    5.23
   8  -3   3   39.05    4.87
   8  -4   3    1.43    4.25
   8  -5   3    3.54    5.44
   8  -6   3   11.47    7.22
   7   6   3    4.01    4.65
   7   5   3   41.14    5.82
   7   4   3   36.71    5.26
   7   3   3  288.71   18.39
   7   3   3  307.25   14.63
   7   2   3   87.01    6.53
   7   2   3   79.00    4.64
   7   1   3  909.65   53.69
   7   1   3  946.34   43.80
   7   0   3    0.93    1.93
   7   0   3    1.12    1.52
   7  -1   3  972.56   54.26
   7  -1   3  912.19   44.86
   7  -2   3   88.18    5.81
   7  -2   3   83.65    6.37
   7  -3   3  337.27   17.90
   7  -4   3   43.89    5.61
   7  -5   3   53.55    7.11
   7  -6   3   -1.27    6.84
   6   7   3    5.67    5.13
   6   6   3   13.35    4.76
   6   5   3    2.24    3.68
   6   4   3   98.24    7.71
   6   3   3  109.08    7.95
   6   2   3   37.21    2.68
   6   2   3   36.84    4.24
   6   1   3   14.78    2.34
   6   1   3   20.66    2.20
   6   0   3    1.17    1.31
   6   0   3   -0.47    1.55
   6  -1   3   14.43    2.22
   6  -1   3   15.20    1.86
   6  -2   3   51.24    3.78
   6  -2   3   50.34    4.97
   6  -3   3  113.37    8.11
   6  -4   3  125.94    9.34
   6  -5   3    5.26    5.27
   6  -6   3   12.22    7.61
   6  -7   3   -0.49   10.93
   5   7   3    0.91    4.94
   5   6   3    6.17    4.23
   5   5   3    4.47    3.63
   5   4   3   82.58    6.92
  -5  -3  -3  114.23    7.19
   5   3   3  121.06    8.19
   5   2   3  961.20   54.94
   5   2   3  940.31   44.71
   5   1   3  319.17   19.96
   5   1   3  356.23   16.15
   5   0   3  554.48   25.66
   5   0   3  523.68   31.25
   5  -1   3  307.07   17.79
   5  -1   3  303.54   15.22
   5  -2   3 1149.74   65.68
   5  -2   3 1142.44   54.80
   5  -3   3  127.74    8.00
   5  -3   3  104.36    7.73
   5  -4   3   74.38    7.25
   5  -5   3   13.05    5.34
   5  -6   3   18.98    7.86
   5  -7   3    4.04   12.15
   4   7   3    3.23    4.83
   4   6   3   17.90    4.57
   4   5   3   34.28    5.17
  -4  -4  -3    4.08    1.86
   4   4   3    0.96    2.71
  -4  -3  -3   47.97    3.82
   4   3   3   48.36    4.68
   4   2   3  186.79    9.27
  -4  -2  -3  195.07   10.94
   4   2   3  189.69   11.77
   4   1   3  610.90   37.30
   4   1   3  679.52   30.40
   4   0   3   -0.13    0.93
   4   0   3    0.59    1.12
   4  -1   3  607.26   29.29
   4  -1   3  611.23   35.01
   4  -2   3  198.61   12.20
   4  -2   3  211.95   11.16
   4  -3   3   53.21    4.81
   4  -3   3   49.15    5.43
   4  -4   3    0.01    3.81
   4  -4   3    4.16    3.00
   4  -5   3   34.58    6.51
   4  -6   3   20.74    8.83
   4  -7   3   14.78   13.70
   3   7   3    6.67    4.99
   3   6   3    7.72    4.23
   3   5   3   47.83    5.59
   3   4   3   98.23    7.36
  -3  -4  -3   95.06    6.35
  -3  -3  -3  305.36   16.71
   3   3   3  281.58   17.68
   3   1   3  509.62   23.31
   3   1   3  479.63   28.66
   3   0   3 1462.50   67.94
   3   0   3 1430.88   82.74
   3  -1   3  377.33   19.03
   3  -1   3  401.20   22.52
   3  -2   3  218.02   11.77
   3  -2   3  223.62   13.29
   3  -3   3  297.47   16.08
   3  -3   3  312.41   18.46
   3  -4   3  102.40    8.34
   3  -4   3   96.42    7.58
   3  -5   3   61.43    8.12
   3  -6   3    5.01    9.43
   3  -7   3   -0.11   17.60
   2   6   3   11.88    4.14
  -2  -5  -3    3.65    2.56
   2   5   3    4.52    3.27
  -2  -4  -3   51.61    4.23
   2   4   3   54.53    5.08
   2   3   3    9.73    2.16
  -2  -3  -3    5.56    1.49
   2   2   3   10.36    1.79
  -2  -2  -3   17.02    2.02
   2   1   3  100.68    6.33
  -2  -1  -3   98.29    5.89
   2   1   3   98.57    4.84
   2   0   3  334.91   18.60
   2   0   3  306.46   15.38
   2  -1   3   98.83    6.15
   2  -2   3   17.91    2.33
   2  -3   3    6.31    2.23
   2  -4   3   48.02    5.42
   2  -5   3    0.35    4.29
   2  -6   3   11.17   11.31
   2  -7   3   -3.79   24.94
   1   6   3    7.35    3.90
  -1  -5  -3   28.75    4.56
   1   5   3   39.39    5.05
   1   4   3   76.61    6.26
  -1  -4  -3   81.21    5.67
   1   3   3  579.26   34.18
  -1  -3  -3  595.23   32.79
  -1  -2  -3  324.71   17.26
   1   2   3  287.39   17.98
   1   0   3  945.82   50.90
   1   0   3  820.70   41.70
   1  -1   3 2736.34  156.47
   1  -2   3  332.18   19.71
   1  -3   3  561.88   33.04
   1  -4   3   78.65    7.13
   1  -5   3   30.97    6.10
   0  -6  -3   17.88    4.59
   0  -5  -3   63.34    5.76
   0   5   3   53.07    5.62
   0   4   3   18.29    2.91
   0  -4  -3   14.17    2.62
   0   3   3    9.07    1.92
   0  -3  -3    6.91    1.68
   0  -2  -3  156.39    9.73
   0   2   3  179.16   10.18
   0   1   3  825.63   47.51
   0  -1  -3  827.08   45.64
   0   0   3 1629.89   93.70
   0  -1   3  865.73   49.89
   0  -2   3  151.71    9.70
   0  -3   3    7.93    2.59
   0  -4   3   13.04    4.00
   0  -5   3   73.41   10.00
   0  -6   3   20.78   11.20
   1  -6  -3   89.09    8.51
   1  -5  -3   20.54    3.91
  -1   5   3   21.31    3.35
   1  -5  -3   18.73    4.84
  -1   4   3  173.34   11.43
   1  -4  -3  192.05   10.45
  -1   3   3   54.19    4.18
   1  -3  -3   42.58    3.96
  -1   2   3  506.03   31.98
   1  -2  -3  603.46   30.94
   1  -2  -3  554.17   26.46
  -1   1   3  242.59   13.72
   1  -1  -3  233.12   13.32
   1  -1  -3  228.31   11.26
   1   0  -3 1612.01   74.48
   1   0  -3 1607.08   87.43
  -1   0   3 1509.78   90.75
  -1  -1   3  242.76   14.62
  -1  -2   3  564.44   33.05
  -1  -3   3   50.05    5.33
  -1  -4   3  229.63   15.83
  -1  -5   3   28.17    7.70
  -1  -6   3  144.24   20.57
   2  -6  -3   46.04    6.24
   2  -5  -3   57.57    6.77
  -2   4   3   10.45    2.27
   2  -4  -3    9.38    2.98
  -2   3   3   74.23    5.62
   2  -3  -3   96.04    5.56
   2  -2  -3   15.21    1.91
  -2   2   3   21.74    2.23
   2  -1  -3   60.30    3.65
  -2   1   3   46.37    3.37
   2  -1  -3   58.83    2.95
   2   0  -3  292.37   15.99
  -2   0   3  273.25   16.72
   2   0  -3  295.09   13.60
  -2  -1   3   57.07    4.49
  -2  -5   3   96.01   12.95
  -2  -6   3   89.42   17.69
   3  -7  -3    5.50    6.24
   3  -5  -3   48.18    6.22
   3  -4  -3   34.90    4.04
  -3   4   3   46.89    3.81
  -3   3   3  420.36   25.32
   3  -3  -3  454.44   21.51
  -3   2   3  150.12    9.22
   3  -2  -3  161.75    8.14
   3  -1  -3 1823.67   85.79
   3   0  -3  692.34   39.30
  -3   0   3  722.92   41.03
   3   0  -3  713.45   33.46
   3   1  -3 1706.15   80.20
   3   2  -3  143.32    8.93
   3   3  -3  409.51   24.17
   3   4  -3   47.60    4.82
  -3  -6   3   70.36   17.25
  -3  -7   3   26.92   39.14
   4  -7  -3    1.31    6.06
   4  -5  -3   19.86    4.41
   4  -4  -3   26.67    3.60
  -4   3   3   44.64    3.18
   4  -3  -3   37.16    4.23
   4  -2  -3  155.61    8.17
   4  -1  -3  114.01    5.81
  -4   0   3    0.95    1.40
   4   0  -3    1.50    0.78
   4   0  -3    1.36    0.77
   4   1  -3  106.67    5.40
   4   1  -3  103.16    6.67
   4   2  -3  143.38    9.02
   4   3  -3   53.26    4.69
   4   4  -3   16.75    3.06
  -4  -6   3   15.21   14.45
  -4  -7   3   22.07   32.93
   5  -5  -3    4.56    3.89
   5  -4  -3  168.88   10.02
   5  -3  -3   62.84    4.94
   5  -3  -3   78.75    5.40
   5  -2  -3  713.21   34.02
   5  -1  -3  930.86   43.82
   5   0  -3 1060.98   60.81
   5   0  -3 1061.86   49.84
   5   1  -3  883.25   41.85
   5   1  -3  894.31   51.13
   5   2  -3  487.48   23.92
   5   2  -3  516.25   29.33
   5   3  -3  107.73    7.57
   5   4  -3  154.94   10.47
   5   5  -3    5.99    3.42
  -5  -7   3    9.74   24.63
   6  -6  -3   -1.36    5.35
   6  -5  -3   68.06    7.06
   6  -4  -3   45.92    5.51
   6  -3  -3  189.04   10.41
   6  -2  -3  348.65   17.16
   6  -1  -3  227.98   11.18
   6   0  -3  143.35    8.83
   6   0  -3  147.81    7.32
   6   1  -3  208.48   12.36
   6   1  -3  199.34   10.01
   6   2  -3  260.43   12.84
   6   2  -3  263.13   15.86
   6   3  -3  158.78   10.38
   6   4  -3   45.53    5.37
   6   5  -3   62.75    6.44
  -6  -7   3   21.35   19.83
   7  -6  -3   19.11    6.07
   7  -5  -3   32.48    5.18
   7  -4  -3  146.26    9.40
   7  -3  -3   74.84    5.78
   7  -2  -3 1063.64   50.44
   7  -1  -3  240.38   11.81
   7   0  -3 1053.62   61.27
   7   0  -3 1082.55   50.26
   7   1  -3  206.53   10.04
   7   1  -3  197.73   12.31
   7   2  -3  849.62   48.35
   7   2  -3  818.65   39.49
   7   3  -3   65.13    5.77
   7   4  -3  133.50    9.55
   7   5  -3   34.12    5.50
   7   6  -3   14.99    4.81
  -7  -7   3   24.53   16.00
   8  -6  -3    6.89    5.86
   8  -5  -3   12.12    4.68
   8  -4  -3   93.42    7.53
   8  -3  -3  110.22    7.35
   8  -2  -3    9.94    2.34
   8  -1  -3   25.69    2.76
   8   0  -3  232.24   13.89
   8   0  -3  233.91   11.47
   8   1  -3   23.94    3.39
   8   1  -3   28.52    2.70
   8   2  -3    1.92    2.06
   8   2  -3    2.59    1.61
   8   3  -3   71.35    4.79
   8   3  -3   67.55    6.07
   8   4  -3   50.47    5.66
   8   5  -3    9.13    4.03
   8   6  -3    5.55    4.62
   9  -6  -3   12.76    6.14
   9  -5  -3   40.40    5.84
   9  -4  -3   16.28    4.27
   9  -3  -3  498.33   24.74
   9  -2  -3  131.31    7.62
   9  -1  -3  884.46   52.72
   9  -1  -3  955.41   43.56
   9   0  -3   37.53    3.58
   9   0  -3   32.17    2.91
   9   1  -3  786.00   44.93
   9   1  -3  763.30   36.76
   9   2  -3  106.74    7.71
   9   3  -3  358.25   22.18
   9   3  -3  373.10   18.04
   9   4  -3   14.23    3.71
   9   5  -3   24.31    4.66
   9   6  -3   10.00    4.77
  10  -6  -3   10.95    6.34
  10  -5  -3   13.93    5.32
  10  -4  -3   30.83    4.94
  10  -3  -3   58.63    5.87
  10  -2  -3   79.10    5.66
  10  -1  -3   84.63    5.21
  10   0  -3   23.88    3.47
  10   0  -3   23.41    2.84
  10   1  -3   55.48    5.09
  10   1  -3   57.56    4.15
  10   2  -3   41.26    4.92
  10   2  -3   39.17    3.69
  10   3  -3   57.17    5.80
  10   3  -3   52.12    4.42
  10   4  -3   19.51    4.15
  10   5  -3   13.07    4.45
  10   6  -3    8.52    4.89
  11  -6  -3    8.60    6.52
  11  -5  -3   12.19    5.51
  11  -4  -3   78.77    7.49
  11  -3  -3   19.65    4.04
  11  -2  -3  183.43   10.13
  11  -1  -3  101.87    6.21
  11   0  -3  106.05    6.33
  11   0  -3  107.64    7.48
  11   1  -3   73.60    5.04
  11   1  -3   75.19    6.22
  11   2  -3  103.99    8.15
  11   2  -3  109.57    6.55
  11   3  -3    8.56    3.43
  11   3  -3    7.01    2.77
  11   4  -3   59.14    6.62
  11   5  -3    6.87    4.46
  11   6  -3    5.51    4.96
  12  -6  -3   -3.85    6.45
  12  -5  -3   -3.00    5.40
  12  -4  -3   27.31    5.38
  12  -3  -3   37.31    4.88
  12  -2  -3  117.41    7.52
  12  -1  -3   55.10    4.71
  12   0  -3  146.34    8.21
  12   1  -3   58.46    4.70
  12   1  -3   58.62    5.77
  12   2  -3   76.75    7.02
  12   2  -3   81.45    5.60
  12   3  -3   22.58    4.34
  12   3  -3   27.01    3.56
  12   4  -3   18.46    4.65
  12   5  -3    0.76    4.47
  13  -5  -3   67.27    8.51
  13  -4  -3    5.52    5.16
  13  -3  -3   78.00    7.08
  13  -2  -3  193.06   10.81
  13  -1  -3  270.90   13.98
  13   0  -3    4.90    2.83
  13   1  -3  207.35   13.31
  13   1  -3  198.14   10.89
  13   2  -3  155.65   11.03
  13   2  -3  154.92    9.05
  13   3  -3   55.36    5.39
  13   3  -3   55.44    6.66
  13   4  -3    9.58    4.60
  13   5  -3   46.28    7.18
  14  -5  -3    2.98    6.34
  14  -4  -3   16.74    5.76
  14  -3  -3   47.72    5.86
  14  -2  -3   10.48    3.84
  14  -1  -3  184.04   10.34
  14   0  -3   -1.03    3.05
  14   1  -3  181.74   10.22
  14   2  -3    9.53    3.98
  14   2  -3    8.10    3.54
  14   3  -3   40.37    6.53
  14   3  -3   45.08    5.24
  14   4  -3   20.16    4.15
  14   4  -3   15.39    5.23
  14   5  -3    1.55    5.01
  15  -4  -3    3.39    5.86
  15  -3  -3   94.78    8.24
  15  -2  -3    5.47    4.18
  15  -1  -3  203.41   11.40
  15   0  -3   -0.28    3.46
  15   1  -3  171.20   10.02
  15   2  -3    0.40    4.19
  15   2  -3    4.76    3.77
  15   3  -3   70.47    8.05
  15   3  -3   72.67    6.48
  15   4  -3    1.73    5.06
  16  -4  -3   -0.92    6.03
  16  -3  -3    1.99    5.23
  16  -2  -3   76.81    7.10
  16  -1  -3   60.66    6.27
  16   0  -3   22.70    4.32
  16   1  -3   64.35    6.38
  16   2  -3   75.98    6.90
  16   3  -3    2.29    5.00
  16   3  -3    2.34    4.50
  16   4  -3    9.81    4.67
  16   4  -3   -2.35    5.22
  17  -3  -3   10.64    5.87
  17  -2  -3   79.00    7.57
  17  -1  -3    1.65    4.50
  17   0  -3   24.72    4.83
  17   1  -3    2.22    4.41
  17   2  -3   77.85    7.36
  17   3  -3    2.10    5.01
  17   4  -3    7.06    5.94
  18  -2  -3   17.49    5.68
  18  -1  -3   18.10    5.29
  18   0  -3   71.22    7.03
  18   1  -3   19.66    5.26
  18   2  -3   25.71    5.87
  18   3  -3   13.04    5.85
  19  -1  -3   30.27    6.00
  19   0  -3    4.38    5.23
  19   1  -3   21.60    5.78
  19   2  -3   12.30    5.84
  18  -1   4    4.88    5.09
  17   0   4   37.52    5.48
  17  -1   4   64.23    7.16
  17  -2   4   32.21    6.13
  16   3   4    3.30    6.99
  16   0   4    5.30    4.35
  16  -1   4   -2.05    4.38
  16  -2   4    3.23    5.18
  15   3   4   -0.16    6.37
  15   2   4   79.86   10.02
  15   0   4  137.73    8.98
  15  -1   4   21.94    4.53
  15  -2   4   63.12    6.96
  15  -3   4    1.87    5.91
  14   4   4   10.36    6.53
  14   3   4    6.56    6.16
  14   2   4   18.78    6.07
  14   1   4   38.26    6.55
  14   1   4   31.87    4.80
  14   0   4   13.66    3.98
  14  -1   4   37.13    4.65
  14  -2   4   14.48    4.73
  14  -3   4    5.52    5.63
  14  -4   4    2.79    6.96
  13   4   4   22.41    6.37
  13   3   4   54.23    8.16
  13   2   4   18.75    5.60
  13   1   4  161.33    9.71
  13   1   4  171.44   12.84
  13   0   4    3.25    3.41
  13  -1   4  186.39   10.50
  13  -2   4   26.49    4.86
  13  -3   4   78.08    8.41
  13  -4   4   35.55    7.54
  12   5   4    8.18    5.89
  12   4   4    9.04    5.49
  12   3   4   -1.02    4.81
  12   2   4   16.01    5.16
  12   1   4  130.78   10.67
  12   1   4  128.85    8.01
  12   0   4    1.34    3.04
  12   0   4    2.17    4.11
  12  -1   4  113.21    7.41
  12  -2   4   10.95    4.08
  12  -3   4    7.25    5.18
  12  -4   4    8.02    6.27
  12  -5   4    8.94    7.44
  11   5   4   -1.79    5.14
  11   4   4   17.27    5.30
  11   3   4   40.67    6.54
  11   2   4   36.71    5.34
  11   2   4   22.77    3.27
  11   1   4  383.33   19.55
  11   1   4  409.04   24.50
  11   0   4  395.12   23.55
  11   0   4  370.97   18.86
  11  -1   4  367.81   18.41
  11  -2   4   73.25    6.67
  11  -3   4   56.25    7.24
  11  -4   4   16.44    6.11
  11  -5   4   -3.59    6.50
  10   5   4   10.34    5.10
  10   4   4   -0.40    4.27
  10   3   4   25.82    4.90
  10   2   4   36.32    3.67
  10   2   4   39.98    6.10
  10   1   4  126.14    7.46
  10   1   4  132.74    9.75
  10   0   4   37.82    4.64
  10   0   4   37.48    4.14
  10  -1   4  161.60   10.41
  10  -1   4  131.65    8.40
  10  -2   4   35.27    4.45
  10  -3   4   31.52    5.26
  10  -4   4    3.35    5.32
  10  -5   4    6.51    6.43
   9   6   4   -0.69    5.06
   9   5   4   25.35    5.43
   9   4   4   70.79    7.22
   9   3   4   -0.83    3.53
   9   2   4  237.60   15.29
   9   2   4  234.80   11.82
   9   1   4   83.06    7.23
   9   1   4   86.09    5.41
   9   0   4  628.02   30.48
   9   0   4  647.60   37.48
   9  -1   4   93.08    7.10
   9  -1   4   81.26    5.85
   9  -2   4  267.96   14.45
   9  -3   4    0.11    3.86
   9  -4   4   87.87    8.73
   9  -5   4   35.15    7.09
   9  -6   4   -0.37    7.55
   8   6   4   11.75    5.22
   8   5   4    5.23    4.32
   8   4   4   46.96    6.01
   8   3   4   23.55    4.10
   8   2   4   25.09    2.74
   8   2   4   22.27    3.74
   8   1   4  242.59   12.49
   8   1   4  262.29   15.78
   8   0   4   84.00    5.25
   8   0   4   85.20    6.73
   8  -1   4  261.93   15.31
   8  -1   4  238.92   12.89
   8  -2   4   32.42    3.85
   8  -2   4   31.98    3.97
   8  -3   4   25.69    4.55
   8  -4   4   57.13    7.35
   8  -5   4   11.59    6.12
   8  -6   4    7.56    7.61
   7   6   4    9.80    4.83
   7   5   4    6.20    4.16
   7   4   4   10.89    3.64
   7   3   4  127.44    9.24
   7   2   4   18.79    3.25
   7   2   4   18.99    2.28
   7   1   4  957.24   44.69
   7   1   4  936.58   54.85
   7   0   4   53.44    3.83
   7   0   4   50.84    4.83
   7  -1   4  966.09   53.46
   7  -1   4  888.83   44.21
   7  -2   4   17.97    3.28
   7  -2   4   18.03    2.89
   7  -3   4  140.11    9.57
   7  -4   4   12.25    4.68
   7  -5   4   10.26    5.85
   7  -6   4    7.97    7.75
   6   6   4    5.62    4.60
   6   5   4   36.53    5.60
   6   4   4   14.53    3.62
  -6  -3  -4   38.95    3.33
   6   2   4   99.99    5.37
   6   2   4  105.18    7.43
   6   1   4   52.93    3.39
   6   1   4   52.69    4.86
   6   0   4  642.75   37.87
   6   0   4  664.18   31.05
   6  -1   4   48.36    4.11
   6  -1   4   50.69    3.94
   6  -2   4   85.85    6.49
   6  -2   4   88.84    5.77
   6  -3   4   45.89    5.11
   6  -4   4    9.69    4.40
   6  -5   4   39.72    6.90
   6  -6   4    1.72    7.61
   5   7   4   -0.51    4.92
   5   6   4   17.40    4.75
   5   5   4   20.56    4.29
   5   4   4  192.29   12.65
  -5  -3  -4   64.76    4.68
   5   2   4  501.76   28.61
   5   2   4  470.80   23.01
   5   1   4   47.94    4.54
   5   1   4   55.22    3.16
   5   0   4 1360.33   62.55
   5   0   4 1298.35   76.23
   5  -1   4   26.33    2.64
   5  -1   4   23.76    2.52
   5  -2   4  526.00   27.27
   5  -2   4  578.58   32.02
   5  -3   4   80.98    5.94
   5  -3   4   64.56    6.49
   5  -4   4  237.41   14.30
   5  -5   4   33.33    6.71
   5  -6   4   18.58    8.50
   5  -7   4   -1.46   13.08
   4   7   4    3.13    4.88
   4   6   4   10.02    4.52
   4   5   4   72.69    6.79
  -4  -4  -4   57.55    4.54
   4   4   4   50.17    5.52
   4   3   4   78.13    6.64
  -4  -3  -4  100.85    6.00
   4   2   4  488.13   22.29
  -4  -2  -4  444.65   26.23
   4   2   4  479.76   27.64
   4   1   4  220.55   10.01
   4   1   4  193.80   12.58
   4   0   4  307.19   14.73
   4   0   4  300.94   17.84
   4  -1   4  174.86    9.34
   4  -1   4  176.61   10.44
   4  -2   4  470.24   22.89
   4  -2   4  447.33   26.60
   4  -3   4  111.83    7.87
   4  -3   4  103.45    7.55
   4  -4   4   72.83    7.74
   4  -4   4   68.86    6.61
   4  -5   4  116.45   10.94
   4  -6   4   10.25    9.58
   4  -7   4    7.70   15.70
   3   7   4    5.34    5.01
   3   6   4    9.43    4.30
   3   5   4   20.45    3.92
  -3  -4  -4   62.08    4.61
   3   4   4   52.31    5.55
  -3  -3  -4  122.07    7.55
  -3  -2  -4  959.64   51.92
   3   2   4  917.85   54.11
   3   1   4  341.02   15.48
   3   1   4  312.78   19.21
   3   0   4  518.52   29.60
   3   0   4  508.09   24.39
   3  -1   4  257.46   12.71
   3  -1   4  244.18   14.62
   3  -2   4  910.89   44.57
   3  -2   4  942.93   53.43
   3  -3   4  118.26    8.20
   3  -4   4   63.01    6.07
   3  -4   4   60.24    7.20
   3  -5   4   23.33    7.17
   3  -6   4   19.58   10.94
   3  -7   4   -8.47   20.88
   2   6   4    8.02    4.17
   2   5   4   25.25    3.98
  -2  -5  -4   16.01    3.09
  -2  -4  -4   32.16    3.55
   2   4   4   44.45    4.68
   2   3   4  133.54    9.12
  -2  -3  -4  146.20    8.49
  -2  -2  -4  100.58    6.21
   2   2   4  100.66    6.67
   2   1   4  422.64   26.30
   2   1   4  433.26   21.39
  -2  -1  -4  505.55   25.28
   2   0   4   14.96    1.82
   2   0   4   15.06    1.88
   2  -1   4  474.56   27.44
   2  -2   4  102.74    7.00
   2  -3   4  148.50    9.87
   2  -4   4   37.43    5.03
   2  -5   4   12.46    4.50
   2  -6   4   19.67   13.58
   2  -7   4   73.65   35.25
   1   6   4   45.31    6.10
  -1  -5  -4   21.02    3.39
  -1  -4  -4   22.96    3.38
   1   4   4   27.71    3.48
  -1  -3  -4  383.88   20.90
   1   3   4  353.44   21.80
   1   2   4   51.92    4.53
  -1  -2  -4   77.72    4.41
   1   1   4 1222.46   67.70
  -1  -1  -4 1140.20   65.12
   1   0   4   16.53    1.66
   1  -1   4 1085.15   62.30
   1  -2   4   80.90    5.95
   1  -3   4  385.76   23.11
   1  -4   4   27.48    4.11
   1  -5   4   31.91    5.70
   0  -6  -4    9.30    4.20
   0  -5  -4   20.42    3.57
   0   5   4   23.57    3.77
   0   4   4  110.63    7.74
   0  -4  -4  107.08    7.33
   0   3   4   81.64    5.75
   0  -3  -4   77.46    5.38
   0  -2  -4  498.40   27.66
   0   2   4  492.19   28.70
   0  -1  -4  519.91   26.55
   0   1   4  433.52   27.43
   0   0   4 1563.54   89.90
   0  -1   4  496.52   28.88
   0  -2   4  497.89   29.24
   0  -3   4   74.46    6.18
   0  -4   4  102.19    8.55
   0  -5   4   18.03    5.78
   0  -6   4   17.11    9.31
   1  -6  -4   27.87    5.24
   1  -5  -4   21.55    3.73
  -1   5   4   13.98    3.29
   1  -4  -4  109.84    7.55
   1  -4  -4  132.22    8.16
  -1   4   4  116.06    8.22
  -1   3   4  297.66   16.64
   1  -3  -4  254.38   13.87
   1  -3  -4  283.01   16.08
   1  -2  -4  327.41   17.96
   1  -2  -4  366.47   21.12
  -1   2   4  430.57   21.87
   1  -1  -4  534.60   29.76
  -1   1   4  535.83   30.79
   1   0  -4 1246.96   67.91
  -1   0   4 1200.27   70.24
  -1  -1   4  520.66   30.37
  -1  -2   4  335.52   20.15
  -1  -3   4  271.02   16.94
  -1  -4   4  125.85   10.19
  -1  -5   4   19.82    6.62
  -1  -6   4   36.39   12.11
   2  -6  -4   16.66    5.01
   2  -5  -4   35.29    5.30
  -2   4   4  135.29    8.77
   2  -4  -4  128.74    8.06
  -2   3   4  126.62    8.09
  -2   2   4  549.43   32.18
   2  -2  -4  539.60   26.56
   2  -2  -4  586.47   31.21
   2  -1  -4  700.11   38.89
  -2   1   4  704.50   40.25
  -2   0   4 1570.66   95.24
   2   0  -4 1720.79   78.20
   2   0  -4 1690.02   91.76
  -2  -1   4  717.46   41.58
  -2  -2   4  570.30   33.49
  -2  -3   4   94.54    7.66
  -2  -4   4  163.98   12.58
  -2  -5   4   40.51    8.29
  -2  -6   4   27.70   13.27
   3  -7  -4   18.09    6.69
   3  -6  -4    6.64    4.78
   3  -5  -4   17.16    4.10
  -3   4   4   13.89    2.31
   3  -4  -4   13.88    3.02
   3  -3  -4  243.98   12.54
  -3   3   4  245.97   14.56
  -3   2   4  859.48   49.77
   3  -2  -4  875.48   41.03
   3  -1  -4  978.45   42.60
  -3   1   4  806.83   51.89
   3  -1  -4  935.04   50.15
   3   0  -4   68.57    4.23
  -3   0   4   68.23    4.88
   3   0  -4   70.85    3.61
   3   1  -4  792.45   39.47
  -3  -1   4  884.87   48.56
  -3  -2   4  837.58   48.79
  -3  -4   4   20.61    5.49
  -3  -5   4   28.28    8.44
  -3  -6   4   14.49   13.50
  -3  -7   4   28.64   30.97
   4  -7  -4    5.03    6.17
   4  -5  -4   45.29    5.21
   4  -4  -4    2.92    2.72
  -4   3   4  214.59   12.80
   4  -3  -4  218.23   11.33
   4  -2  -4  156.88    7.84
  -4   2   4  146.90    8.96
   4  -1  -4 1591.55   77.48
  -4   1   4 1705.95   94.47
  -4   0   4   51.78    4.11
   4   0  -4   49.40    2.82
   4   0  -4   49.56    3.29
  -4  -1   4 1509.48   89.47
   4   1  -4 1604.77   73.09
   4   2  -4  137.94    8.75
   4   3  -4  229.78   14.13
  -4  -5   4   76.92   10.91
  -4  -6   4   19.78   14.17
  -4  -7   4   15.52   28.14
   5  -7  -4   12.24    6.52
   5  -5  -4   49.43    6.28
   5  -4  -4   94.50    6.83
   5  -3  -4    9.68    2.35
  -5   3   4    6.18    1.11
   5  -2  -4  272.84   13.43
   5  -1  -4  281.27   13.48
  -5   0   4   59.20    4.65
   5   0  -4   61.08    3.40
   5   0  -4   61.09    3.90
   5   1  -4  360.74   20.74
   5   1  -4  346.96   16.93
   5   2  -4  276.39   16.23
   5   2  -4  264.31   13.21
   5   3  -4    7.75    2.30
   5   4  -4   68.10    6.22
  -5  -6   4   23.44   13.54
  -5  -7   4   44.02   25.33
   6  -7  -4    4.85    6.15
   6  -5  -4   34.85    4.94
   6  -4  -4   90.97    6.76
   6  -3  -4   10.47    2.58
   6  -2  -4   25.42    3.04
   6  -1  -4  166.68    8.29
   6   0  -4  240.39   11.41
  -6   0   4  228.86   14.17
   6   0  -4  236.51   13.29
   6   1  -4  169.19   10.31
   6   1  -4  166.49    8.41
   6   2  -4   34.33    2.87
   6   2  -4   32.47    3.72
   6   3  -4    7.50    2.34
   6   4  -4   56.29    5.72
  -6  -6   4   28.01   12.79
  -6  -7   4   12.17   20.07
   7  -5  -4    6.79    4.24
   7  -4  -4   97.80    7.24
   7  -3  -4  123.71    7.61
   7  -2  -4  593.41   28.43
   7  -1  -4   69.45    4.05
   7   0  -4    6.30    1.37
   7   0  -4    8.07    1.30
   7   1  -4   76.64    5.42
   7   1  -4   75.63    4.39
   7   2  -4  403.14   19.73
   7   2  -4  414.57   24.20
   7   3  -4   94.31    7.11
   7   4  -4   72.89    6.55
   7   5  -4    2.68    3.62
  -7  -7   4   21.39   16.27
   8  -6  -4   13.49    6.03
   8  -5  -4   70.82    7.48
   8  -4  -4   20.14    4.04
   8  -3  -4   81.29    5.96
   8  -2  -4  390.44   19.09
   8  -1  -4  595.89   28.34
   8   0  -4  867.89   49.55
   8   0  -4  855.24   40.68
   8   1  -4  519.48   24.89
   8   1  -4  516.01   28.80
   8   1  -4  527.63   30.40
   8   2  -4  346.87   20.35
   8   2  -4  331.84   16.55
   8   3  -4   50.13    5.26
   8   4  -4    7.39    3.27
   8   5  -4   58.07    6.54
   9  -6  -4   19.12    6.28
   9  -5  -4   73.40    7.73
   9  -4  -4   65.19    6.39
   9  -3  -4   94.81    6.80
   9  -2  -4    3.42    2.21
   9  -1  -4  174.82    8.98
   9   0  -4   30.48    3.28
   9   0  -4   33.26    2.97
   9   1  -4  190.28   10.64
   9   1  -4  187.36    9.64
   9   1  -4  189.23   11.79
   9   2  -4    1.00    1.81
   9   2  -4    1.01    2.18
   9   3  -4   50.28    5.55
   9   3  -4   52.77    4.22
   9   4  -4   49.54    5.89
   9   5  -4   49.31    6.35
  10  -6  -4    4.25    6.04
  10  -5  -4   10.26    5.08
  10  -4  -4   23.30    4.60
  10  -3  -4  409.42   20.63
  10  -2  -4   17.38    2.81
  10  -1  -4  493.29   23.75
  10   0  -4   18.61    2.25
  10   0  -4   19.57    2.37
  10   1  -4  483.28   28.28
  10   1  -4  477.49   23.15
  10   2  -4   12.17    2.34
  10   2  -4   12.81    2.95
  10   3  -4  292.55   14.69
  10   3  -4  289.49   18.11
  10   4  -4   26.19    4.46
  10   5  -4   13.51    4.47
  10   6  -4    4.79    4.81
  11  -6  -4   13.24    6.40
  11  -5  -4    4.79    5.14
  11  -4  -4  144.50    9.70
  11  -3  -4  119.31    8.06
  11  -2  -4  170.30    9.45
  11  -1  -4   28.23    3.56
  11   0  -4  313.60   17.76
  11   0  -4  278.07   14.61
  11   1  -4   21.69    3.12
  11   1  -4   19.63    2.62
  11   2  -4  148.17    8.23
  11   2  -4  148.74   10.21
  11   3  -4   78.35    7.05
  11   3  -4   79.44    5.56
  11   4  -4   84.16    7.61
  11   5  -4    3.00    4.19
  11   6  -4   13.19    5.32
  12  -6  -4   -2.06    6.37
  12  -5  -4   24.40    5.94
  12  -4  -4   23.69    5.17
  12  -3  -4   27.23    4.33
  12  -2  -4  176.21    9.88
  12  -1  -4   15.42    2.84
  12   0  -4  936.39   44.52
  12   1  -4   14.00    3.05
  12   1  -4   10.10    2.62
  12   2  -4  208.74   11.26
  12   2  -4  217.82   13.91
  12   3  -4   17.56    3.33
  12   3  -4   18.39    4.10
  12   4  -4   17.49    4.59
  12   5  -4   16.24    4.99
  13  -5  -4   15.60    6.09
  13  -4  -4   13.22    5.15
  13  -3  -4   59.24    6.26
  13  -2  -4   88.26    6.56
  13  -1  -4    6.07    2.85
  13   0  -4  465.56   22.79
  13   1  -4   11.10    3.28
  13   1  -4    8.37    2.90
  13   2  -4   98.74    6.61
  13   2  -4   97.87    8.12
  13   3  -4   58.39    6.69
  13   3  -4   57.75    5.43
  13   4  -4    4.80    4.34
  13   5  -4   14.07    5.18
  14  -5  -4   28.38    6.78
  14  -4  -4   20.44    5.68
  14  -3  -4  105.53    8.16
  14  -2  -4   63.11    5.96
  14  -1  -4  331.30   16.77
  14   0  -4  114.92    7.27
  14   1  -4  283.50   14.69
  14   2  -4   61.35    6.74
  14   2  -4   58.77    5.45
  14   3  -4   73.98    7.79
  14   3  -4   81.76    6.39
  14   4  -4    7.89    4.75
  14   5  -4   29.29    5.97
  15  -4  -4    3.25    5.73
  15  -3  -4   37.75    5.68
  15  -2  -4    4.77    4.13
  15  -1  -4   40.54    5.21
  15   0  -4    2.02    3.37
  15   1  -4   24.48    4.05
  15   2  -4    3.46    3.71
  15   2  -4    6.33    4.10
  15   3  -4   21.20    5.20
  15   3  -4   25.27    4.65
  15   4  -4    6.15    4.12
  15   4  -4    4.84    4.90
  16  -4  -4   15.60    6.37
  16  -3  -4    8.16    5.39
  16  -2  -4   45.69    5.56
  16  -1  -4  106.58    7.67
  16   0  -4   58.14    5.83
  16   1  -4  117.00    8.04
  16   2  -4   30.93    4.86
  16   3  -4    6.29    4.98
  16   3  -4    8.42    4.55
  16   4  -4   12.63    5.60
  16   4  -4   20.02    5.01
  17  -3  -4   22.17    6.04
  17  -2  -4   58.27    6.83
  17  -1  -4   -1.81    4.31
  17   0  -4   29.37    4.81
  17   1  -4    2.60    4.29
  17   2  -4   41.13    5.70
  17   3  -4   15.92    5.36
  17   4  -4    9.79    5.96
  17   4  -4   15.31    5.28
  18  -2  -4  126.57    9.54
  18  -1  -4    8.12    5.00
  18   0  -4  121.60    8.71
  18   1  -4    4.51    4.83
  18   2  -4  115.21    9.22
  18   3  -4   -5.69    5.43
  19  -1  -4    2.62    5.19
  19   0  -4   -1.29    5.08
  19   1  -4    1.42    5.18
  19   2  -4    9.02    5.85
  17  -1   5   76.76    7.54
  16   3   5    0.35    7.49
  16   0   5   33.24    5.16
  16  -1   5    9.72    4.65
  16  -2   5   37.55    6.02
  15   3   5    1.15    6.70
  15   2   5   67.43    9.95
  15   0   5  116.65    8.21
  15  -1   5    6.36    4.21
  15  -2   5   45.05    5.85
  15  -3   5    0.88    6.03
  14   4   5   42.01    8.06
  14   3   5    7.68    6.45
  14   2   5   89.15   10.24
  14   1   5   42.85    7.24
  14   0   5   35.63    4.55
  14  -1   5   37.71    4.61
  14  -2   5   68.86    6.82
  14  -3   5    4.01    5.79
  14  -4   5   54.62    8.90
  13   4   5    6.27    6.18
  13   3   5   38.13    7.08
  13   2   5   82.75    9.50
  13   1   5  220.02   12.37
  13   1   5  236.88   16.37
  13   0   5  102.80    7.10
  13  -1   5  166.60    9.77
  13  -2   5   75.89    7.13
  13  -3   5   48.07    6.83
  13  -4   5   10.38    7.28
  12   5   5    7.44    6.17
  12   4   5    1.99    5.59
  12   3   5   37.56    6.53
  12   2   5  172.46   13.18
  12   1   5  147.92    9.01
  12   1   5  160.97   12.15
  12   0   5  172.26   10.10
  12   0   5  202.91   13.53
  12  -1   5  173.85    9.92
  12  -2   5  167.48   10.42
  12  -3   5   28.92    5.96
  12  -4   5    8.88    6.65
  11   5   5    5.95    5.77
  11   4   5    4.42    5.23
  11   3   5   23.41    5.56
  11   2   5   61.92    7.83
  11   1   5  339.22   17.06
  11   1   5  337.73   21.46
  11   0   5   52.07    4.60
  11   0   5   44.04    6.96
  11  -1   5  280.22   14.54
  11  -2   5   47.15    5.92
  11  -3   5   21.22    5.45
  11  -4   5   19.29    6.53
  11  -5   5    8.49    7.51
  10   5   5   21.89    5.78
  10   4   5   32.44    5.81
  10   3   5   82.38    8.21
  10   2   5  284.11   18.33
  10   1   5   13.03    2.88
  10   1   5   14.62    4.27
  10   0   5  724.47   40.79
  10   0   5  656.75   33.01
  10  -1   5    6.48    3.59
  10  -1   5    8.79    2.90
  10  -2   5  315.69   16.72
  10  -3   5  106.50    8.86
  10  -4   5   45.82    7.02
  10  -5   5   29.10    7.77
   9   6   5    8.72    5.63
   9   5   5    8.95    5.02
   9   4   5   34.20    5.42
   9   3   5   77.29    7.63
   9   2   5  186.21   12.84
   9   1   5   13.32    3.74
   9   1   5   11.96    2.50
   9   0   5  310.40   15.64
   9   0   5  321.51   19.55
   9  -1   5   16.17    3.34
   9  -1   5   14.41    2.88
   9  -2   5  226.30   12.68
   9  -3   5  104.40    8.63
   9  -4   5   51.22    6.97
   9  -5   5    6.76    6.59
   8   6   5    4.99    5.31
   8   5   5   16.49    5.00
   8   4   5    0.10    3.85
   8   3   5   26.12    4.42
   8   2   5  178.94   11.64
   8   2   5  161.84    8.63
   8   1   5  145.94    7.87
   8   1   5  148.66   10.26
   8   0   5  543.54   26.08
   8   0   5  543.04   32.02
   8  -1   5  151.80    9.73
   8  -1   5  144.29    8.47
   8  -2   5  192.29   11.25
   8  -2   5  198.70   12.14
   8  -3   5   13.64    4.40
   8  -4   5    9.48    5.19
   8  -5   5   20.86    6.73
   8  -6   5  -15.51    7.78
   7   6   5   12.94    5.22
   7   5   5    7.50    4.37
   7   4   5    6.13    3.72
   7   3   5   15.55    3.67
   7   2   5   73.00    6.46
   7   2   5   68.45    4.16
   7   1   5  100.87    5.82
   7   1   5  110.22    7.80
   7   0   5   60.70    4.09
   7   0   5   52.94    5.23
   7  -1   5  102.04    6.97
   7  -1   5  101.93    6.36
   7  -2   5   75.51    5.39
   7  -2   5   71.45    6.15
   7  -3   5   24.81    4.59
   7  -4   5    6.32    4.89
   7  -5   5   13.30    6.68
   7  -6   5    3.99    8.34
   6   6   5    6.88    4.72
   6   5   5   22.25    4.67
   6   4   5   16.98    3.85
   6   3   5  638.63   37.64
   6   2   5   90.52    7.14
   6   2   5   93.88    4.96
   6   1   5  484.48   28.58
   6   1   5  485.69   23.09
   6   0   5  117.94    7.97
   6   0   5  121.01    6.48
   6  -1   5  530.19   30.10
   6  -1   5  507.21   25.23
   6  -2   5  119.30    7.43
   6  -2   5  110.44    7.73
   6  -3   5  664.50   33.20
   6  -4   5   26.49    5.45
   6  -5   5   21.75    6.75
   6  -6   5    0.05    8.66
   5   7   5    5.03    5.21
   5   6   5   12.81    4.66
   5   5   5    4.34    3.88
   5   4   5  207.20   13.55
   5   3   5  115.90    8.12
  -5  -3  -5  106.55    7.00
   5   2   5   73.90    4.05
   5   2   5   75.72    6.03
   5   1   5  269.72   16.38
   5   1   5  273.16   13.05
   5   0   5  151.63    9.68
   5   0   5  160.56    8.06
   5  -1   5  296.71   15.06
   5  -1   5  301.70   17.52
   5  -2   5   89.83    5.98
   5  -2   5   88.75    6.57
   5  -3   5  126.60    8.55
   5  -3   5  128.21    8.99
   5  -4   5  306.44   17.64
   5  -5   5    5.95    6.36
   5  -6   5   16.27    9.37
   4   7   5    1.21    5.09
   4   6   5   18.98    4.87
   4   5   5   10.53    3.88
  -4  -4  -5   53.82    4.83
   4   4   5   62.53    5.78
  -4  -3  -5   68.63    4.77
   4   3   5   56.83    5.49
   4   2   5  516.79   24.78
  -4  -2  -5  542.76   29.29
   4   2   5  515.29   30.74
   4   1   5   68.48    3.51
   4   1   5   58.98    5.00
   4   0   5 1969.17   92.36
   4   0   5 1965.85  112.53
   4  -1   5   62.52    4.62
   4  -1   5   61.13    4.19
   4  -2   5  605.08   29.12
   4  -2   5  576.55   34.16
   4  -3   5   70.12    5.91
   4  -3   5   70.03    6.73
   4  -4   5   59.29    7.76
   4  -4   5   59.05    6.40
   4  -5   5    1.51    6.62
   4  -6   5   14.82   10.89
   4  -7   5    8.15   18.74
   3   6   5    7.61    4.29
   3   5   5   13.14    3.80
   3   4   5   30.12    4.45
  -3  -4  -5   20.75    2.80
  -3  -3  -5   23.27    3.10
   3   3   5   23.71    3.18
  -3  -2  -5   39.17    3.49
   3   2   5   47.97    4.14
   3   1   5   28.37    1.76
   3   1   5   24.67    3.06
   3   0   5  180.64   10.31
   3   0   5  163.03    8.60
   3  -1   5   24.17    2.42
   3  -1   5   27.78    2.73
   3  -2   5   36.14    3.63
   3  -2   5   30.57    3.85
   3  -3   5   26.27    4.07
   3  -4   5   25.24    4.06
   3  -5   5    9.54    7.53
   3  -6   5    7.68   12.47
   3  -7   5   11.78   26.04
   2   6   5    3.98    4.06
   2   5   5   31.33    5.02
  -2  -5  -5   32.45    4.17
  -2  -4  -5  140.95    8.87
   2   4   5  143.69    9.62
  -2  -3  -5  389.58   22.60
   2   3   5  410.20   23.72
  -2  -2  -5  641.81   33.95
   2   2   5  575.63   35.29
  -2  -1  -5 1251.88   70.91
   2   1   5 1322.22   73.80
   2   0   5   70.79    4.33
   2   0   5   60.79    3.89
   2  -1   5 1223.33   70.09
   2  -2   5  651.04   37.86
   2  -3   5  396.34   23.74
   2  -4   5  132.64    9.54
   2  -5   5   29.90    5.25
   2  -6   5   10.56   16.00
   2  -7   5  147.14   50.42
   1   6   5   30.25    4.91
   1   5   5   63.54    6.05
  -1  -5  -5   56.89    5.49
  -1  -4  -5  132.26    8.32
   1   4   5  127.00    8.92
   1   3   5   44.13    4.28
  -1  -3  -5   45.44    3.72
  -1  -2  -5   49.13    4.10
   1   2   5   66.88    4.41
   1   1   5  923.27   51.51
  -1  -1  -5  870.27   49.55
   1   0   5  139.29    8.34
   1  -1   5  915.49   52.65
   1  -2   5   52.50    4.59
   1  -3   5   42.51    4.71
   1  -4   5  139.05    9.97
   1  -5   5   60.73    7.43
   0  -6  -5   10.36    4.18
   0   5   5   31.39    4.90
   0  -5  -5   36.07    4.80
   0   4   5    7.25    2.67
   0  -4  -5    8.96    2.38
   0  -3  -5  167.36    8.44
   0   3   5  137.30   10.07
   0  -3  -5  179.77    9.80
   0  -2  -5  722.73   37.81
   0   2   5  685.04   39.21
   0  -2  -5  631.23   32.05
   0  -1  -5  806.29   47.65
   0   1   5  917.51   49.49
   0   0   5  562.43   32.34
   0  -1   5  793.28   45.80
   0  -2   5  713.90   41.59
   0  -3   5  172.87   11.32
   0  -4   5   10.08    3.59
   0  -5   5   45.08    6.53
   0  -6   5   16.28    8.37
   1  -6  -5    2.06    4.18
  -1   5   5   65.98    6.01
   1  -5  -5   62.28    6.06
  -1   4   5   59.62    5.86
   1  -4  -5   84.30    5.68
   1  -4  -5   70.64    5.57
   1  -3  -5   29.33    3.19
   1  -3  -5   22.99    2.86
  -1   3   5   24.84    3.19
   1  -2  -5  155.55    8.89
   1  -2  -5  141.35    7.32
   1  -1  -5   17.26    2.31
   1  -1  -5   19.51    1.21
  -1   0   5  565.28   33.46
   1   0  -5  596.01   32.19
  -1  -1   5   18.52    2.43
  -1  -2   5  149.32    9.81
  -1  -3   5   28.35    4.55
  -1  -4   5   81.46    7.86
  -1  -5   5   68.62    9.31
  -1  -6   5   -1.16    9.16
   2  -7  -5   -4.35    5.72
   2  -6  -5   51.87    7.16
   2  -5  -5   54.35    5.96
  -2   4   5  181.30   11.04
   2  -4  -5  157.18    9.63
   2  -4  -5  177.58   10.99
   2  -3  -5   64.86    4.67
   2  -3  -5   72.09    5.33
  -2   3   5   78.19    5.28
  -2   2   5  977.57   58.61
   2  -2  -5 1038.85   56.63
   2  -2  -5 1051.52   48.12
   2  -1  -5  258.19   14.84
  -2   1   5  241.26   15.18
   2  -1  -5  284.11   12.40
  -2   0   5  851.12   48.94
   2   0  -5  851.99   40.02
  -2  -1   5  269.76   16.33
  -2  -2   5  981.92   56.93
  -2  -3   5   66.15    6.40
  -2  -4   5  170.14   12.61
  -2  -5   5   62.49    8.66
  -2  -6   5   64.00   13.24
   3  -7  -5    5.68    6.33
   3  -6  -5    4.79    4.60
   3  -5  -5  145.25   10.35
   3  -4  -5   37.84    4.65
  -3   4   5   48.25    4.49
   3  -4  -5   50.86    5.09
   3  -3  -5  104.32    6.11
  -3   3   5  104.05    6.83
   3  -3  -5  104.67    6.97
   3  -2  -5   72.41    4.27
  -3   2   5   85.35    5.01
   3  -2  -5   73.62    5.30
   3  -1  -5   42.14    2.34
   3  -1  -5   38.26    3.16
  -3   1   5   42.32    2.84
  -3   0   5  174.01   10.82
   3   0  -5  183.28    8.66
  -3  -1   5   42.55    4.40
  -3  -2   5   70.78    6.01
  -3  -3   5  103.95    8.51
  -3  -4   5   47.82    7.69
  -3  -5   5  160.12   14.90
  -3  -6   5   -2.31   11.60
  -3  -7   5   16.27   25.40
   4  -7  -5    9.98    6.51
   4  -6  -5   16.91    5.23
   4  -5  -5   22.33    4.39
   4  -4  -5   66.64    5.42
  -4   3   5  645.66   39.26
   4  -3  -5  718.60   32.69
  -4   2   5  273.69   15.15
   4  -2  -5  256.18   12.64
   4  -2  -5  248.15   15.00
  -4   1   5 2076.33  115.67
   4  -1  -5 1990.81  111.36
   4  -1  -5 2001.01   95.03
   4   0  -5 1444.08   81.68
  -4   0   5 1502.42   85.00
   4   0  -5 1498.31   69.72
   4   1  -5 1942.75   89.75
  -4  -1   5 1883.60  109.84
  -4  -2   5  238.95   15.12
  -4  -3   5  718.38   42.69
  -4  -4   5   78.59    9.30
  -4  -5   5   21.59    8.28
  -4  -6   5   15.43   12.68
  -4  -7   5   11.79   24.83
   5  -7  -5   10.71    6.51
   5  -6  -5   21.41    5.56
   5  -5  -5    4.80    3.76
   5  -4  -5   41.60    4.79
  -5   3   5   36.53    3.01
   5  -2  -5  229.51   10.29
  -5   2   5  185.09   11.99
   5  -1  -5   69.58    4.60
   5  -1  -5   74.87    3.65
  -5   1   5   56.96    4.18
   5   0  -5  162.81    8.10
   5   0  -5  162.03    9.47
  -5   0   5  168.33   10.28
   5   1  -5   51.67    3.43
  -5  -1   5   64.49    5.27
  -5  -2   5  204.34   13.35
  -5  -4   5   42.11    6.79
  -5  -5   5   24.09    8.46
  -5  -6   5   26.68   12.98
  -5  -7   5   10.59   22.39
   6  -7  -5   -5.68    6.04
   6  -5  -5    6.41    3.91
   6  -4  -5  240.28   13.04
   6  -3  -5  404.89   19.94
   6  -2  -5 1404.49   66.09
   6  -1  -5  337.62   16.16
   6   0  -5 1522.70   71.70
  -6   0   5 1535.53   87.73
   6   0  -5 1526.14   84.14
   6   1  -5  315.29   15.06
  -6  -1   5  304.83   18.90
   6   1  -5  312.37   17.28
   6   2  -5 1158.34   54.65
   6   3  -5  341.33   20.55
  -6  -5   5    9.77    8.06
  -6  -6   5   14.70   12.19
  -6  -7   5   10.24   19.18
   7  -5  -5  190.07   11.66
   7  -4  -5   55.87    5.73
   7  -3  -5  244.82   12.69
   7  -2  -5   22.22    2.83
   7  -1  -5   11.07    1.48
  -7   1   5    9.78    1.33
   7   0  -5  566.78   31.54
   7   0  -5  578.32   26.96
  -7   0   5  555.45   33.12
   7   1  -5   12.35    1.60
   7   1  -5    9.97    1.34
   7   2  -5   27.94    2.76
   7   2  -5   28.00    3.13
   7   3  -5  159.26   10.55
   7   4  -5   34.66    4.44
  -7  -6   5   46.45   12.24
   8  -5  -5   37.80    5.45
   8  -4  -5  208.60   11.83
   8  -3  -5  417.60   20.66
   8  -2  -5  721.76   34.37
   8  -1  -5   61.98    3.89
  -8   0   5 1112.84   64.81
   8   0  -5 1126.12   52.94
   8   0  -5 1133.14   62.03
   8   1  -5   80.92    4.76
   8   1  -5   76.49    4.70
   8   1  -5   81.23    5.80
   8   2  -5  585.83   28.45
   8   2  -5  603.43   34.80
   8   3  -5  346.89   21.05
   8   4  -5  181.19   12.22
  -8  -6   5   37.51   11.12
   9  -5  -5   23.88    5.13
   9  -4  -5   26.09    4.30
   9  -3  -5   70.47    5.64
   9  -2  -5   98.04    5.90
   9  -1  -5   18.94    2.49
   9   0  -5   12.16    1.79
   9   1  -5    7.87    1.02
   9   1  -5   10.12    2.15
   9   1  -5   10.53    1.84
   9   2  -5   85.84    6.50
   9   2  -5   80.84    5.17
   9   3  -5   28.76    4.63
   9   3  -5   31.65    3.73
   9   4  -5   30.44    4.42
  10  -5  -5   26.98    5.38
  10  -4  -5   18.57    4.37
  10  -3  -5  215.86   11.77
  10  -2  -5   36.64    3.89
  10  -1  -5  787.35   37.38
  10   0  -5   79.27    4.89
  10   1  -5  764.02   37.02
  10   1  -5  791.82   45.15
  10   2  -5   26.10    3.37
  10   2  -5   27.36    3.57
  10   3  -5  125.60    7.28
  10   3  -5  118.16    9.02
  10   4  -5   11.98    3.90
  10   5  -5   19.68    4.75
  11  -6  -5    9.06    6.32
  11  -5  -5   15.70    5.33
  11  -4  -5   35.90    5.19
  11  -3  -5   53.82    5.57
  11  -2  -5   24.93    3.22
  11  -1  -5    2.37    2.10
  11   0  -5    7.64    2.11
  11   0  -5    8.22    2.11
  11   1  -5    2.30    2.32
  11   1  -5    1.80    2.00
  11   2  -5   27.39    3.78
  11   2  -5   25.06    3.00
  11   3  -5   34.18    5.25
  11   3  -5   35.92    4.24
  11   4  -5   33.69    5.02
  11   5  -5   13.15    4.66
  12  -6  -5   17.61    6.81
  12  -5  -5   19.93    5.77
  12  -4  -5  106.51    8.36
  12  -3  -5   16.62    3.94
  12  -2  -5  639.98   30.92
  12  -1  -5  102.29    6.35
  12   0  -5  194.22   10.22
  12   1  -5   98.31    7.27
  12   1  -5   88.24    5.80
  12   2  -5  569.32   33.74
  12   3  -5   18.69    3.98
  12   3  -5   15.34    3.27
  12   4  -5   80.48    7.65
  12   5  -5   20.79    5.20
  13  -5  -5    1.80    5.78
  13  -4  -5   22.24    5.22
  13  -3  -5   62.61    6.19
  13  -2  -5  112.25    7.35
  13  -1  -5   39.31    4.30
  13   0  -5  124.87    7.38
  13   1  -5   52.22    4.70
  13   1  -5   53.75    5.73
  13   2  -5   99.06    8.01
  13   2  -5   92.34    6.48
  13   3  -5   39.41    6.00
  13   3  -5   44.68    4.84
  13   4  -5   13.59    4.65
  13   5  -5    6.80    4.83
  14  -5  -5   -1.04    5.87
  14  -4  -5   24.22    5.51
  14  -3  -5   56.90    6.28
  14  -2  -5   80.78    6.41
  14  -1  -5   94.05    6.47
  14   0  -5  173.43    9.65
  14   1  -5  104.39    6.89
  14   2  -5   89.53    6.53
  14   2  -5   93.00    8.05
  14   3  -5   36.39    5.46
  14   3  -5   41.09    5.14
  14   4  -5   11.09    4.69
  14   5  -5    2.94    5.06
  15  -4  -5   14.08    5.70
  15  -3  -5    1.92    4.79
  15  -2  -5    7.49    4.06
  15  -1  -5   23.62    3.94
  15   0  -5    8.93    3.41
  15   1  -5   18.57    3.77
  15   2  -5   10.99    4.33
  15   2  -5    9.06    3.86
  15   3  -5    5.59    4.11
  15   3  -5    1.03    4.31
  15   4  -5   12.24    5.20
  16  -4  -5   16.88    6.22
  16  -3  -5   22.16    5.65
  16  -2  -5   37.97    5.23
  16  -1  -5  254.74   13.78
  16   0  -5    6.76    3.77
  16   1  -5  240.94   13.24
  16   2  -5   44.42    5.71
  16   3  -5   31.12    5.15
  16   3  -5   24.90    5.63
  16   4  -5   16.86    5.77
  16   4  -5   22.77    5.00
  17  -3  -5   -0.24    5.59
  17  -2  -5   16.41    4.97
  17  -1  -5   23.41    4.80
  17   0  -5   -1.60    3.95
  17   1  -5   25.13    4.73
  17   2  -5   14.25    4.77
  17   3  -5   -1.02    4.81
  17   4  -5   24.10    5.41
  17   4  -5    7.03    5.76
  18  -2  -5   77.87    7.80
  18  -1  -5   46.76    5.78
  18   0  -5  165.39   10.35
  18   1  -5   39.28    5.64
  18   2  -5   64.98    7.28
  18   3  -5   17.54    5.77
  19  -1  -5    3.51    5.01
  19   0  -5    2.85    4.94
  19   1  -5   -1.59    5.01
  19   2  -5    0.14    5.40
  17  -1   6   28.19    5.44
  16  -1   6   19.56    4.77
  16  -2   6   29.77    5.83
  15   3   6   20.60    7.94
  15   2   6    6.24    7.07
  15  -1   6    4.03    4.21
  15  -2   6    3.43    4.84
  15  -3   6    9.30    6.64
  14   3   6   10.90    6.74
  14   2   6  140.71   12.88
  14   1   6  123.45   12.07
  14   0   6  146.52    9.08
  14  -1   6   90.02    6.86
  14  -2   6  130.81    9.27
  14  -3   6    1.56    6.08
  13   4   6    0.77    6.44
  13   3   6   -1.00    6.12
  13   2   6   32.92    7.10
  13   1   6  124.22   11.50
  13   0   6   -1.17    3.48
  13  -1   6  111.16    7.57
  13  -2   6   26.78    5.03
  13  -3   6    3.30    5.74
  13  -4   6   -2.79    7.18
  12   4   6   11.52    6.12
  12   3   6  106.75   10.41
  12   2   6    3.96    5.55
  12   1   6  181.58   13.65
  12   0   6  119.63   10.45
  12   0   6  110.97    7.29
  12  -1   6  132.11    8.23
  12  -2   6    0.13    4.14
  12  -3   6  113.44   10.03
  12  -4   6   10.51    7.06
  11   5   6    5.33    5.98
  11   4   6    6.66    5.64
  11   3   6    1.62    5.13
  11   2   6    2.91    4.98
  11   1   6   11.04    4.91
  11   1   6   11.30    3.27
  11   0   6   99.41    6.71
  11   0   6  108.95    9.30
  11  -1   6   18.13    3.49
  11  -2   6    7.39    3.99
  11  -3   6    4.32    5.14
  11  -4   6    8.05    6.54
  11  -5   6    5.55    7.81
  10   5   6    5.34    5.63
  10   4   6   42.86    6.53
  10   3   6   58.04    7.55
  10   2   6  373.83   23.51
  10   1   6  109.11    9.48
  10   1   6  115.14    6.89
  10   0   6  472.62   23.87
  10   0   6  512.97   29.73
  10  -1   6  103.68    7.01
  10  -1   6  114.35    8.89
  10  -2   6  375.64   19.52
  10  -3   6   82.76    8.49
  10  -4   6   77.35    9.41
  10  -5   6    0.10    7.26
   9   5   6   10.02    5.32
   9   4   6   14.19    5.00
   9   3   6   45.41    6.71
   9   2   6   38.83    5.34
   9   1   6   23.47    4.38
   9   1   6   21.65    2.89
   9   0   6   24.15    4.18
   9   0   6   23.24    2.86
   9  -1   6   20.01    3.67
   9  -1   6   16.31    3.05
   9  -2   6   37.84    4.55
   9  -3   6   77.45    7.91
   9  -4   6   15.03    5.99
   9  -5   6   25.74    7.78
   8   6   6   11.12    5.66
   8   5   6   15.97    5.24
   8   4   6   64.08    7.12
   8   3   6  188.83   13.08
   8   2   6  223.58   14.67
   8   1   6  267.05   17.14
   8   1   6  276.64   13.55
   8   0   6  226.56   11.86
   8   0   6  243.17   14.92
   8  -1   6  277.62   16.41
   8  -1   6  259.82   13.86
   8  -2   6  275.85   15.06
   8  -2   6  282.31   16.87
   8  -3   6  192.32   12.24
   8  -4   6   71.18    8.74
   8  -5   6   27.43    7.62
   8  -6   6   -0.09    8.85
   7   6   6   11.88    5.42
   7   5   6   17.29    5.03
   7   4   6   61.82    6.72
   7   3   6    7.78    3.67
   7   2   6    0.75    3.01
   7   1   6    8.93    1.98
   7   1   6   10.40    3.07
   7   0   6  165.23    8.49
   7   0   6  156.44   10.53
   7  -1   6   14.08    2.51
   7  -1   6   14.77    2.62
   7  -2   6    4.73    2.09
   7  -2   6    3.24    2.97
   7  -3   6    1.27    4.06
   7  -4   6   71.11    8.63
   7  -5   6   15.33    7.19
   7  -6   6   14.89    9.60
   6   6   6    3.67    4.94
   6   5   6   27.52    5.13
   6   4   6   41.47    5.76
   6   3   6  442.36   26.67
   6   2   6  213.55   13.35
   6   2   6  202.35   10.12
   6   1   6 1648.37   78.13
   6   1   6 1681.98   95.74
   6   0   6  166.43   10.42
   6   0   6  163.30    8.57
   6  -1   6 1353.17   64.68
   6  -1   6 1376.05   78.25
   6  -2   6  207.52   12.55
   6  -2   6  208.48   11.84
   6  -3   6  583.65   32.86
   6  -3   6  535.44   28.64
   6  -4   6   41.54    6.46
   6  -5   6   38.29    7.95
   6  -6   6    3.92    9.52
   5   7   6   -2.04    5.20
   5   6   6   13.74    5.05
   5   5   6    5.33    4.09
   5   4   6   63.43    6.32
   5   3   6   66.36    6.15
   5   2   6   15.07    1.80
   5   2   6   15.63    2.93
   5   1   6  123.07    6.28
   5   1   6  123.69    8.42
   5   0   6  262.82   12.74
   5   0   6  253.68   15.44
   5  -1   6  107.47    6.54
   5  -1   6  104.44    6.73
   5  -2   6   10.71    3.09
   5  -2   6   12.08    2.07
   5  -3   6   89.44    7.88
   5  -3   6   86.50    6.59
   5  -4   6   95.55    9.44
   5  -5   6    6.92    7.21
   5  -6   6   21.24   10.82
   4   7   6    6.88    5.33
   4   6   6   13.93    4.88
   4   5   6    7.23    3.87
  -4  -4  -6  278.33   16.73
   4   4   6  293.83   17.86
   4   3   6   11.26    2.98
  -4  -3  -6   13.35    2.17
  -4  -2  -6  698.54   35.86
   4   2   6  608.51   37.52
   4   2   6  623.12   30.30
   4   1   6   71.80    5.61
   4   1   6   73.87    3.92
   4   0   6  664.21   32.35
   4   0   6  698.37   39.34
   4  -1   6   81.69    5.30
   4  -1   6   79.16    5.35
   4  -2   6  716.19   41.99
   4  -2   6  738.10   35.59
   4  -3   6   16.04    3.10
   4  -3   6   16.93    4.39
   4  -4   6  334.85   19.13
   4  -4   6  317.86   20.27
   4  -5   6   11.57    7.91
   4  -6   6   10.03   12.13
   3   6   6    4.44    4.25
   3   5   6    6.93    3.63
   3   4   6   51.01    5.40
  -3  -4  -6   48.63    4.50
   3   3   6   18.95    3.07
   3   2   6   23.33    3.59
  -3  -2  -6   23.83    2.81
   3   1   6  218.96   13.27
   3   0   6   82.93    5.13
   3   0   6   70.40    4.47
   3  -1   6  219.50   11.30
   3  -1   6  211.13   12.76
   3  -2   6   25.82    3.29
   3  -4   6   57.06    6.36
   3  -5   6   -3.51    8.23
   3  -6   6    5.00   14.60
   3  -7   6    9.02   33.60
   2   6   6    9.53    4.35
   2   5   6   17.36    4.06
  -2  -5  -6   22.87    3.32
   2   4   6   84.09    6.50
  -2  -4  -6   69.01    5.59
   2   3   6  351.48   21.29
  -2  -3  -6  360.89   20.35
   2   2   6   60.23    5.00
  -2  -2  -6   65.50    4.56
  -2  -1  -6 1306.72   73.38
   2   1   6 1355.95   76.36
   2   0   6 1346.35   64.12
   2   0   6 1378.90   77.97
   2  -1   6 1216.22   69.72
   2  -2   6   64.68    5.26
   2  -3   6  370.40   22.38
   2  -4   6   70.83    6.71
   2  -5   6   28.20    5.22
   1   6   6   13.90    4.34
   1   5   6   49.11    5.71
  -1  -5  -6   43.26    4.80
  -1  -4  -6   67.91    5.28
   1   4   6   71.85    6.01
   1   3   6   36.08    4.19
  -1  -3  -6   43.93    3.77
   1   2   6  213.83   13.15
  -1  -2  -6  219.35   12.65
   1   1   6  246.33   14.62
  -1  -1  -6  246.88   14.05
   1   0   6    7.28    1.20
   1  -1   6  256.23   15.23
   1  -2   6  217.48   13.56
   1  -3   6   44.59    5.05
   1  -4   6   67.49    6.61
   1  -5   6   53.93    7.29
   0  -6  -6   30.94    4.97
   0   5   6  126.69    8.79
   0  -5  -6  105.91    8.21
   0  -4  -6  164.89   10.72
   0   4   6  183.25   11.34
   0   3   6  596.80   32.78
   0  -3  -6  496.70   26.70
   0  -3  -6  591.58   31.56
   0  -2  -6  427.72   21.35
   0   2   6  325.83   21.98
   0  -1  -6 2774.36  141.11
   0   1   6 2355.32  146.71
   0   0   6   65.20    4.35
   0  -1   6 2688.95  153.80
   0  -2   6  447.88   26.59
   0  -3   6  573.34   33.93
   0  -4   6  158.67   11.26
   0  -5   6  110.89   10.01
   0  -6   6   36.46    8.67
   1  -6  -6   17.64    4.69
  -1   5   6   38.59    5.14
   1  -5  -6   39.42    5.06
   1  -4  -6   34.16    4.05
  -1   4   6   27.89    4.26
   1  -3  -6   20.68    2.70
   1  -3  -6   29.74    3.09
  -1   2   6 1322.58   74.31
   1  -2  -6 1299.38   71.61
   1  -2  -6 1265.95   60.78
   1  -1  -6   11.42    1.57
  -1   1   6   12.14    1.95
   1   0  -6 1147.04   62.12
  -1   0   6 1107.08   64.57
  -1  -1   6   12.63    2.24
  -1  -2   6 1266.88   73.16
  -1  -3   6   30.24    4.52
  -1  -4   6   38.02    5.15
  -1  -5   6   43.56    6.80
  -1  -6   6   25.64    9.08
   2  -7  -6    0.45    5.76
   2  -6  -6   37.28    5.72
   2  -5  -6   81.16    7.07
   2  -4  -6  279.72   16.46
  -2   4   6  273.04   16.81
  -2   3   6   88.15    6.07
   2  -3  -6   84.08    5.05
   2  -3  -6   90.07    6.12
  -2   2   6 1293.98   74.38
   2  -2  -6 1288.10   71.78
   2  -2  -6 1313.07   60.90
   2  -1  -6   14.22    1.74
  -2   1   6   18.62    1.97
   2  -1  -6   13.87    1.31
   2   0  -6 2202.61  119.51
   2   0  -6 2175.15  101.79
  -2   0   6 2109.58  124.22
  -2  -1   6   16.17    2.59
  -2  -2   6 1283.78   74.18
  -2  -3   6   89.90    7.38
  -2  -4   6  257.62   17.13
  -2  -5   6   91.18   10.47
  -2  -6   6   50.66   11.05
   3  -7  -6    8.89    6.25
   3  -6  -6    7.98    4.81
   3  -5  -6  117.45    8.85
   3  -4  -6    3.02    2.63
  -3   4   6    5.07    2.36
   3  -4  -6    5.05    2.51
   3  -3  -6   62.19    4.14
   3  -3  -6   62.26    4.88
  -3   3   6   57.65    4.61
  -3   2   6  234.03   14.64
   3  -2  -6  260.55   12.01
   3  -2  -6  254.74   14.47
  -3   1   6   64.31    4.79
   3  -1  -6   78.06    4.96
   3  -1  -6   84.89    3.89
   3   0  -6   64.11    3.50
  -3   0   6   64.19    4.66
   3   0  -6   62.57    4.11
  -3  -1   6   81.09    6.25
  -3  -2   6  256.97   16.08
  -3  -3   6   62.56    6.43
  -3  -4   6    6.60    4.45
  -3  -5   6  125.66   12.49
  -3  -6   6   13.65   10.78
  -3  -7   6   19.76   21.72
   4  -7  -6    4.97    6.33
   4  -6  -6    4.77    4.89
   4  -5  -6  132.84    9.89
   4  -4  -6   -0.54    2.43
   4  -4  -6   -0.16    2.56
  -4   3   6  588.24   35.14
   4  -3  -6  630.14   29.11
   4  -3  -6  606.12   34.30
   4  -2  -6  215.97   13.13
   4  -2  -6  232.46   10.93
   4  -1  -6 1094.18   50.00
   4  -1  -6 1047.93   58.91
  -4   1   6 1051.95   60.98
  -4   0   6  151.01    9.86
   4   0  -6  160.99    7.81
   4   0  -6  160.39    9.19
   4   1  -6  981.01   48.02
  -4  -1   6 1058.54   59.08
  -4  -2   6  196.39   12.81
  -4  -3   6  549.25   33.09
  -4  -4   6   -2.85    4.49
  -4  -5   6  146.02   14.38
  -4  -6   6    3.34   11.43
  -4  -7   6   -8.18   21.69
   5  -7  -6   -1.26    6.27
   5  -6  -6   15.75    5.33
   5  -5  -6   94.91    8.07
   5  -4  -6   47.25    5.33
   5  -4  -6   37.56    4.61
  -5   3   6   48.91    4.19
   5  -3  -6   63.65    5.20
   5  -3  -6   63.30    4.34
   5  -2  -6    5.45    1.25
   5  -2  -6    4.18    1.73
   5  -1  -6  200.72    9.57
  -5   1   6  192.45   11.55
   5  -1  -6  197.00   11.46
   5   0  -6   29.27    2.67
   5   0  -6   30.07    2.30
  -5   0   6   35.86    3.74
   5   1  -6  186.98    9.45
  -5  -1   6  192.90   12.16
  -5  -2   6    4.22    2.84
  -5  -3   6   60.68    7.04
  -5  -4   6   42.12    6.79
  -5  -5   6  102.35   12.87
  -5  -6   6   20.41   12.31
  -5  -7   6    1.94   21.41
   6  -7  -6    4.19    6.45
   6  -6  -6   40.38    6.48
   6  -5  -6  100.83    8.66
   6  -4  -6   64.32    5.57
   6  -3  -6  173.95    9.25
   6  -2  -6  513.48   23.69
   6  -2  -6  479.17   28.04
  -6   1   6  356.65   21.46
   6  -1  -6  375.53   17.69
   6  -1  -6  381.33   21.00
   6   0  -6 1672.68   94.27
  -6   0   6 1721.23   98.30
   6   0  -6 1744.87   80.36
  -6  -1   6  356.45   21.36
   6   1  -6  349.83   17.03
   6   2  -6  443.23   21.57
  -6  -2   6  452.46   27.09
  -6  -3   6  144.89   11.31
  -6  -4   6   53.83    7.51
  -6  -5   6  115.13   13.63
  -6  -6   6   46.79   13.25
  -6  -7   6   10.24   19.04
   7  -6  -6   29.04    6.09
   7  -5  -6    7.48    4.25
   7  -4  -6   28.40    3.87
   7  -3  -6  172.21    9.30
   7  -2  -6  149.98    7.80
   7  -1  -6   13.37    1.86
   7  -1  -6   12.62    1.49
  -7   1   6    9.91    1.47
   7   0  -6   63.42    4.32
   7   0  -6   63.84    3.85
  -7   0   6   66.25    5.34
  -7  -1   6   11.48    2.88
   7   1  -6   13.14    1.67
   7   1  -6    9.74    1.10
  -7  -2   6  142.18    9.69
   7   2  -6  110.26    6.70
  -7  -4   6   27.05    6.48
  -7  -5   6    4.37    7.78
  -7  -6   6   40.13   12.28
   8  -6  -6   12.68    5.56
   8  -5  -6   64.88    6.90
   8  -4  -6  258.67   13.84
   8  -3  -6  130.90    7.69
   8  -2  -6  341.23   16.62
   8  -1  -6  278.03   14.96
   8  -1  -6  278.15   12.61
  -8   1   6  218.27   15.07
   8   0  -6 1523.08   71.14
   8   0  -6 1514.56   83.40
  -8   0   6 1503.37   87.04
   8   1  -6  226.59   12.01
   8   1  -6  243.27   13.64
  -8  -1   6  262.42   15.46
   8   2  -6  283.04   14.07
  -8  -5   6   60.36    9.72
  -8  -6   6   15.39   10.49
   9  -5  -6   45.68    5.67
   9  -4  -6    1.70    3.49
   9  -3  -6  200.41   10.77
   9  -2  -6   76.54    4.90
   9  -1  -6   58.21    3.92
  -9   0   6  681.46   39.71
   9   0  -6  671.50   32.32
   9   0  -6  688.64   37.80
   9   1  -6   53.56    3.60
   9   1  -6   56.19    3.96
   9   2  -6   58.21    4.38
   9   2  -6   63.69    5.50
   9   3  -6  173.23   11.65
  -9  -6   6   14.21    9.87
  10  -5  -6   87.15    8.06
  10  -4  -6    6.46    3.89
  10  -3  -6  188.54   10.42
  10  -2  -6   36.87    3.75
  10  -1  -6  456.47   21.96
  10   0  -6    0.43    1.65
  10   0  -6    0.68    1.28
 -10   0   6    1.86    2.47
  10   1  -6  484.21   23.39
  10   2  -6   24.90    3.48
  10   2  -6   26.27    3.39
  10   3  -6  170.66   11.75
  10   3  -6  174.90    9.47
 -10  -6   6    6.22    8.83
  11  -5  -6    4.50    5.03
  11  -4  -6   16.34    4.35
  11  -3  -6   76.96    6.10
  11  -2  -6  112.11    6.76
  11  -1  -6   54.13    4.24
 -11   0   6   53.28    5.52
  11   0  -6   51.83    3.86
  11   0  -6   49.91    3.98
  11   1  -6   48.09    4.10
  11   2  -6   70.41    5.09
  11   2  -6   73.84    6.39
  11   3  -6   64.03    5.08
  11   3  -6   62.21    6.37
  11   4  -6    5.94    3.90
 -11  -6   6   30.59    9.33
  12  -5  -6    5.25    5.30
  12  -4  -6  122.14    8.74
  12  -3  -6   32.13    4.28
  12  -2  -6  478.66   23.40
  12  -1  -6  478.30   23.23
  12   0  -6  782.24   37.32
  12   1  -6  526.72   29.74
  12   1  -6  477.94   24.35
  12   2  -6  377.35   22.93
  12   3  -6   26.41    3.67
  12   3  -6   31.95    4.59
  12   4  -6  109.64    9.14
  13  -5  -6   14.73    5.79
  13  -4  -6   92.92    7.81
  13  -3  -6   41.89    5.51
  13  -2  -6  249.76   13.08
  13  -1  -6    7.17    2.82
  13   0  -6  282.89   14.35
  13   1  -6    7.83    3.05
  13   1  -6    6.45    2.72
  13   2  -6  220.63   14.39
  13   3  -6   31.50    4.83
  13   3  -6   35.76    4.66
  13   4  -6   67.75    7.39
  14  -5  -6    5.50    5.92
  14  -4  -6   59.91    7.11
  14  -3  -6   26.15    4.74
  14  -2  -6  100.61    7.04
  14  -1  -6   53.51    5.06
  14   0  -6   55.76    4.89
  14   1  -6   47.32    4.75
  14   2  -6   96.14    6.74
  14   2  -6   99.00    8.28
  14   3  -6   34.49    4.48
  14   3  -6   27.91    5.08
  14   4  -6   44.31    6.74
  15  -5  -6   -1.75    6.13
  15  -4  -6   12.51    5.54
  15  -3  -6  112.46    8.43
  15  -2  -6   16.90    4.18
  15  -1  -6   -0.65    3.29
  15   0  -6    8.84    3.26
  15   1  -6    8.59    3.44
  15   2  -6   13.44    3.89
  15   2  -6   18.18    4.47
  15   3  -6   97.10    7.36
  15   3  -6   86.72    8.64
  15   4  -6    8.11    5.11
  16  -4  -6   27.97    6.37
  16  -3  -6  113.98    8.81
  16  -2  -6   45.48    5.44
  16  -1  -6  199.90   11.30
  16   0  -6    6.97    3.62
  16   1  -6  193.56   11.07
  16   2  -6   39.41    4.93
  16   3  -6   94.51    7.71
  16   3  -6   88.31    9.00
  16   4  -6   21.06    5.83
  17  -3  -6   54.10    6.78
  17  -2  -6   54.47    6.61
  17  -1  -6   82.67    7.01
  17   0  -6  116.15    8.04
  17   1  -6   71.73    6.65
  17   2  -6   47.39    5.62
  17   3  -6   33.76    5.63
  17   4  -6   22.89    5.40
  18  -2  -6   13.20    5.36
  18  -1  -6   12.28    4.70
  18   0  -6   12.15    4.65
  18   1  -6    9.89    4.77
  18   2  -6   27.09    5.47
  18   3  -6   12.25    5.66
  19  -1  -6   -5.13    4.89
  19   0  -6   11.72    5.03
  19   1  -6    3.86    5.07
  19   2  -6   41.95    6.38
  16  -2   7   18.36    5.72
  15   3   7    3.36    7.74
  15   2   7    3.08    7.40
  15  -1   7   -3.44    4.14
  15  -2   7   -0.48    5.00
  14   3   7   -1.24    7.00
  14   2   7  103.35   11.76
  14   1   7   19.02    7.15
  14  -1   7   12.09    4.15
  14  -2   7   93.63    8.03
  14  -3   7   -3.28    6.14
  13   4   7    3.70    6.89
  13   3   7    0.07    6.46
  13   2   7   20.86    6.84
  13   1   7   44.55    7.51
  13  -1   7   31.69    4.39
  13  -2   7   15.22    4.82
  13  -3   7   13.64    6.26
  13  -4   7    0.04    7.81
  12   4   7   18.75    6.90
  12   3   7  110.74   11.01
  12   2   7   -0.63    5.69
  12   1   7  347.56   22.67
  12   0   7   11.04    5.40
  12   0   7    3.37    3.29
  12  -1   7  279.27   14.60
  12  -2   7    7.55    4.31
  12  -3   7  116.41   10.17
  12  -4   7   28.26    7.89
  11   4   7   35.71    7.04
  11   3   7   25.84    6.35
  11   2   7   35.44    6.48
  11   1   7   36.40    6.13
  11   0   7    0.94    2.90
  11   0   7    6.42    4.78
  11  -1   7   27.63    3.88
  11  -2   7   31.17    4.83
  11  -3   7   22.78    5.93
  11  -4   7   55.07    8.52
  10   5   7   12.33    6.15
  10   4   7   26.94    6.16
  10   3   7  225.54   15.84
  10   2   7   94.59    9.22
  10   1   7  188.97   13.42
  10   0   7  551.45   27.45
  10   0   7  587.56   34.14
  10  -1   7  235.51   14.58
  10  -1   7  200.29   11.71
  10  -2   7  113.95    8.36
  10  -3   7  284.40   16.55
  10  -4   7   25.64    7.21
  10  -5   7   13.43    8.45
   9   5   7    3.30    5.56
   9   4   7   13.70    5.30
   9   3   7   21.70    5.31
   9   2   7   16.34    4.73
   9   1   7    9.93    4.24
   9   0   7    8.88    3.81
   9   0   7    5.37    2.47
   9  -1   7   11.88    2.93
   9  -1   7   15.16    3.65
   9  -2   7   23.51    4.24
   9  -3   7   29.80    5.58
   9  -4   7   16.77    6.57
   9  -5   7    8.71    7.73
   8   6   7    3.06    5.68
   8   5   7   20.72    5.72
   8   4   7  103.98    9.22
   8   3   7  169.39   12.26
   8   2   7  111.36    9.15
   8   1   7  132.80    7.30
   8   1   7  131.25    9.79
   8   0   7  202.34   10.54
   8   0   7  205.96   13.29
   8  -1   7  104.20    7.33
   8  -1   7   94.96    6.54
   8  -2   7  157.96    9.79
   8  -2   7  154.13   10.14
   8  -3   7  170.48   11.59
   8  -4   7  120.66   10.94
   8  -5   7   18.35    8.15
   7   6   7    3.39    5.46
   7   5   7   12.22    5.12
   7   4   7   10.85    4.52
   7   3   7   85.56    7.86
   7   2   7  109.98    8.78
   7   1   7   90.63    7.47
   7   1   7   86.64    5.28
   7   0   7    3.69    2.64
   7   0   7    3.76    1.92
   7  -1   7   84.85    5.96
   7  -1   7   88.77    6.35
   7  -2   7  114.84    7.55
   7  -2   7  106.05    7.86
   7  -3   7  109.20    9.18
   7  -4   7   17.08    6.18
   7  -5   7   20.57    8.19
   7  -6   7    2.70   10.45
   6   6   7    6.95    5.32
   6   5   7   55.37    6.93
   6   4   7   26.38    4.75
   6   3   7  342.23   21.21
   6   2   7  159.95   10.92
   6   1   7  805.68   37.04
   6   1   7  761.10   45.63
   6   0   7  159.06    8.11
   6   0   7  147.27    9.80
   6  -1   7  641.37   31.67
   6  -1   7  668.43   37.93
   6  -2   7  176.91   10.55
   6  -2   7  173.50   10.80
   6  -3   7  431.37   24.08
   6  -3   7  478.48   27.06
   6  -4   7   43.36    7.08
   6  -5   7   67.38    9.81
   6  -6   7    2.08   10.79
   5   6   7    7.81    5.00
   5   5   7   14.14    4.61
   5   4   7    7.25    3.68
  -5  -3  -7  204.71   13.06
   5   3   7  243.80   14.54
   5   2   7   26.57    3.63
   5   1   7  284.50   17.31
   5   0   7  364.07   17.68
   5   0   7  364.08   21.47
   5  -1   7  236.01   14.08
   5  -1   7  236.63   12.38
   5  -2   7   19.27    3.59
   5  -2   7   18.48    2.96
   5  -3   7  261.21   15.31
   5  -3   7  256.34   15.89
   5  -4   7    8.48    5.85
   5  -5   7   16.78    8.50
   5  -6   7    0.72   11.45
   4   7   7    1.58    5.28
   4   6   7   19.91    5.15
   4   5   7   26.00    4.72
  -4  -4  -7  103.39    7.60
   4   4   7  119.54    8.68
  -4  -3  -7   -0.55    1.93
   4   3   7    1.99    2.79
   4   2   7  340.41   20.39
  -4  -2  -7  333.89   19.14
   4   1   7   42.58    4.28
   4   0   7  423.97   20.93
   4   0   7  446.89   25.40
   4  -1   7   62.43    4.81
   4  -1   7   66.09    4.51
   4  -2   7  362.06   21.84
   4  -2   7  381.54   19.36
   4  -3   7   -1.92    2.60
   4  -3   7   -0.90    4.07
   4  -4   7  116.03   11.11
   4  -4   7  121.19    9.50
   4  -5   7   30.84    9.61
   4  -6   7   29.64   14.30
   3   6   7    5.24    4.51
   3   5   7   11.22    4.06
  -3  -4  -7   25.93    3.85
   3   4   7   16.14    3.67
   3   3   7  110.99    8.36
  -3  -3  -7  120.98    7.59
  -3  -2  -7  331.05   19.88
   3   2   7  371.47   21.06
   3   1   7   95.79    6.66
   3   0   7  346.67   19.42
   3   0   7  316.43   16.09
   3  -1   7   82.82    5.67
   3  -1   7   78.56    5.37
   3  -2   7  350.17   20.76
   3  -3   7  141.85    9.91
   3  -4   7   33.02    4.82
   3  -5   7   22.75   10.44
   3  -6   7    5.96   17.74
   2   6   7    0.87    4.19
   2   5   7   16.82    4.01
  -2  -5  -7   17.76    3.32
  -2  -4  -7  273.63   15.89
   2   4   7  264.55   16.78
   2   3   7  272.31   16.88
  -2  -3  -7  279.88   16.09
  -2  -2  -7 1469.54   82.96
   2   2   7 1535.59   86.35
   2   1   7  962.62   55.40
   2   0   7  407.45   19.87
   2   0   7  418.42   23.96
   2  -1   7  898.64   51.68
   2  -2   7 1510.88   86.86
   2  -3   7  303.23   18.73
   2  -4   7  276.02   17.58
   2  -5   7   20.72    5.08
   1   6   7   17.30    4.63
   1   5   7   93.46    7.86
  -1  -5  -7   98.42    7.33
   1   4   7    7.06    3.02
  -1  -4  -7   12.47    2.59
   1   3   7  123.49    7.70
  -1  -3  -7   94.10    7.07
  -1  -2  -7   48.00    4.26
   1   2   7   61.41    4.73
   1   1   7  489.17   29.97
  -1  -1  -7  545.08   28.90
   1   0   7  218.60   12.91
   1  -1   7  549.70   31.91
   1  -2   7   47.87    4.69
   1  -3   7   96.47    7.62
   1  -4   7   14.42    3.84
   1  -5   7   98.62    9.29
   0  -6  -7    3.64    3.90
   0   5   7   92.67    7.35
   0  -5  -7   77.15    6.66
   0   4   7  196.89   11.48
   0  -4  -7  153.64   10.71
   0  -3  -7  103.26    6.73
   0   3   7   96.88    7.05
   0  -2  -7   81.60    6.28
   0   2   7  110.11    6.62
   0   0   7  173.96   10.41
   0  -1   7  574.36   33.41
   0  -2   7   79.04    6.33
   0  -3   7   96.15    7.69
   0  -4   7  148.65   10.80
   0  -5   7   73.42    8.39
   0  -6   7    1.02    6.86
   1  -6  -7    1.24    4.05
  -1   5   7   20.67    3.94
   1  -5  -7   30.60    4.06
  -1   4   7   37.53    4.59
   1  -4  -7   38.51    4.37
  -1   3   7  171.97   11.29
   1  -3  -7  190.94   11.01
   1  -2  -7  989.59   51.95
  -1   2   7  881.05   53.78
   1  -1  -7  690.58   35.04
  -1   1   7  566.72   36.14
  -1   0   7  138.13    8.45
  -1  -1   7  721.76   41.92
  -1  -2   7 1057.85   61.37
  -1  -3   7  176.31   11.90
  -1  -4   7   39.23    6.06
  -1  -5   7   28.84    6.04
  -1  -6   7   -0.08    7.75
   2  -7  -7    0.68    5.78
   2  -6  -7   28.42    5.31
   2  -5  -7    3.47    3.20
  -2   4   7  343.05   20.96
   2  -4  -7  356.70   20.48
  -2   3   7   84.92    6.48
   2  -3  -7  100.22    5.20
   2  -3  -7   99.61    6.57
  -2   2   7 1668.56   96.59
   2  -2  -7 1633.72   93.10
   2  -2  -7 1759.47   79.05
  -2   1   7  190.14   10.76
   2  -1  -7  175.19    8.64
   2  -1  -7  175.12   10.64
   2   0  -7 2171.25  119.77
  -2   0   7 2154.31  124.47
  -2  -1   7  169.35   10.96
  -2  -2   7 1614.80   93.10
  -2  -3   7   93.68    7.76
  -2  -4   7  354.19   22.41
  -2  -5   7   11.52    5.72
  -2  -6   7   31.29    9.72
   3  -7  -7    4.23    6.03
   3  -6  -7    2.17    4.54
   3  -5  -7   21.64    4.22
  -3   4   7  247.45   14.88
   3  -4  -7  235.58   14.66
   3  -3  -7   90.47    6.50
   3  -3  -7   93.21    5.21
  -3   3   7   96.58    6.38
  -3   2   7  525.08   29.82
   3  -2  -7  518.29   24.30
   3  -2  -7  501.89   29.00
   3  -1  -7  116.28    7.41
   3  -1  -7  125.40    5.99
  -3   0   7  506.47   29.48
   3   0  -7  500.05   28.23
   3   0  -7  514.39   24.00
  -3  -1   7  123.31    8.64
  -3  -2   7  501.39   29.88
  -3  -3   7   81.26    7.29
  -3  -4   7  234.08   16.13
  -3  -5   7   20.31    6.89
  -3  -6   7    3.86    9.64
  -3  -7   7   -8.03   17.10
   4  -7  -7   -0.66    6.10
   4  -6  -7   31.45    5.86
   4  -5  -7   34.54    5.00
   4  -4  -7    8.34    2.99
   4  -3  -7  315.35   18.14
   4  -3  -7  316.83   15.11
  -4   3   7  298.84   18.28
   4  -2  -7  196.81    8.71
   4  -2  -7  187.89   10.77
  -4   2   7  150.15   10.57
   4  -1  -7  596.37   30.31
  -4   1   7  487.52   31.15
   4   0  -7    4.86    1.02
  -4   0   7    4.04    1.75
   4   0  -7    4.09    1.14
  -4  -1   7  607.93   31.29
   4   1  -7  451.16   25.02
  -4  -2   7  176.35   11.80
  -4  -3   7  290.36   18.58
  -4  -4   7   13.47    5.10
  -4  -5   7   36.38    8.08
  -4  -6   7   43.40   12.31
  -4  -7   7   -3.24   18.81
   5  -7  -7    5.47    6.39
   5  -6  -7   32.91    6.10
   5  -5  -7    7.19    4.05
   5  -4  -7   33.70    4.22
   5  -4  -7   32.94    4.23
  -5   3   7  314.66   19.82
   5  -3  -7  344.84   19.81
   5  -3  -7  357.78   16.54
   5  -2  -7  356.15   20.92
   5  -2  -7  374.62   17.46
   5  -1  -7 1455.50   68.11
  -5   1   7 1439.84   83.08
   5  -1  -7 1461.73   80.21
   5   0  -7    1.18    1.05
  -5   0   7   -0.17    1.77
   5   0  -7    0.76    0.98
   5   1  -7 1389.09   67.38
  -5  -1   7 1477.86   82.72
  -5  -2   7  334.38   20.66
  -5  -3   7  311.13   20.03
  -5  -4   7   34.58    6.46
  -5  -5   7    6.33    7.60
  -5  -6   7   33.89   12.54
  -5  -7   7   -6.89   18.62
   6  -6  -7    9.90    5.30
   6  -5  -7   97.03    8.55
   6  -4  -7  221.33   14.40
   6  -4  -7  235.99   12.10
   6  -3  -7  404.87   19.06
   6  -3  -7  377.22   22.70
   6  -2  -7  193.72    9.42
   6  -2  -7  186.10   11.48
   6  -1  -7 1135.64   65.96
  -6   1   7 1274.47   68.34
   6  -1  -7 1167.69   56.02
   6   0  -7  137.90    8.29
   6   0  -7  139.51    7.15
  -6   0   7  141.24    9.19
   6   1  -7 1194.45   54.70
  -6  -1   7 1125.27   67.16
  -6  -2   7  167.36   11.63
  -6  -3   7  337.01   21.67
  -6  -4   7  219.03   16.24
  -6  -5   7  117.69   13.47
  -6  -6   7    6.32   11.23
  -6  -7   7   -8.51   18.23
   7  -6  -7    6.52    5.34
   7  -5  -7    1.36    4.04
   7  -4  -7  364.46   17.80
   7  -4  -7  339.76   20.99
   7  -3  -7  282.47   13.73
   7  -3  -7  264.79   16.45
   7  -2  -7  840.07   38.96
   7  -2  -7  807.81   46.05
   7  -1  -7  220.46   13.48
   7  -1  -7  226.43   11.33
  -7   1   7  247.22   13.68
   7   0  -7  631.43   29.18
   7   0  -7  607.51   34.15
  -7   0   7  603.89   35.88
   7   1  -7  242.63   11.89
   7   1  -7  257.14   13.53
  -7  -1   7  216.79   15.12
  -7  -2   7  766.53   44.78
   7   2  -7  748.18   36.05
  -7  -3   7  254.56   17.20
  -7  -4   7  336.15   22.73
  -7  -5   7   -3.54    7.47
  -7  -6   7   -0.50   10.71
   8  -6  -7   19.84    5.90
   8  -5  -7   37.68    5.61
   8  -3  -7  219.44   11.30
   8  -2  -7  464.55   27.14
   8  -2  -7  489.08   22.86
   8  -1  -7   75.69    4.46
   8  -1  -7   73.88    5.37
   8   0  -7   47.14    3.61
  -8   0   7   46.72    4.86
   8   0  -7   48.99    3.41
  -8  -1   7   72.73    6.13
   8   1  -7   58.46    3.91
   8   1  -7   56.45    3.99
   8   2  -7  388.67   19.80
  -8  -2   7  426.92   25.18
  -8  -3   7  196.51   14.38
  -8  -4   7   13.98    6.08
  -8  -5   7   44.61    9.29
  -8  -6   7   29.32   11.35
   9  -6  -7    7.66    5.58
   9  -5  -7   31.88    5.56
   9  -4  -7   49.08    5.51
   9  -3  -7  130.19    7.62
   9  -2  -7  105.58    6.02
   9  -1  -7  624.28   35.08
   9  -1  -7  627.85   29.79
   9   0  -7  298.57   14.68
   9   0  -7  296.12   17.03
  -9   0   7  305.35   18.26
  -9  -1   7  604.82   36.59
   9   1  -7  598.45   29.49
   9   1  -7  647.50   34.20
   9   2  -7   82.77    5.43
  -9  -2   7   99.90    8.46
  -9  -3   7  107.85   10.21
  -9  -4   7   40.74    7.39
  -9  -5   7   28.36    8.36
  -9  -6   7   14.37   10.11
  10  -6  -7    4.26    5.64
  10  -5  -7   85.33    7.85
  10  -4  -7   23.73    4.09
  10  -3  -7  604.10   29.22
  10  -2  -7   88.37    5.47
  10  -1  -7  194.57    9.95
  10  -1  -7  194.93   11.73
  10   0  -7  133.24    7.11
 -10   0   7  129.08    9.08
  10   0  -7  130.67    7.99
  10   1  -7  182.19    9.57
 -10  -1   7  185.53   12.60
 -10  -2   7   77.31    7.90
  10   2  -7   73.31    5.12
  10   3  -7  526.47   25.66
 -10  -4   7   13.67    6.21
 -10  -5   7   69.39   10.98
 -10  -6   7    8.78    9.48
  11  -6  -7   -2.46    5.66
  11  -5  -7   27.34    5.46
  11  -4  -7   75.72    6.58
  11  -3  -7  412.62   20.47
  11  -2  -7   13.41    2.71
  11  -1  -7  473.16   26.42
  11  -1  -7  457.65   22.49
  11   0  -7   10.21    2.12
  11   0  -7    8.64    1.73
 -11   0   7   13.41    3.18
  11   1  -7  437.94   21.46
 -11  -1   7  445.15   26.92
  11   2  -7   21.57    2.96
  11   3  -7  330.66   16.71
 -11  -5   7   15.78    7.47
  12  -5  -7   26.61    5.67
  12  -4  -7   59.89    6.29
  12  -3  -7   84.92    6.46
  12  -2  -7  119.04    7.24
  12  -1  -7   48.93    4.65
  12  -1  -7   47.83    4.25
  12   0  -7    3.33    2.14
 -12  -1   7   41.50    6.19
  12   1  -7   31.06    3.85
  12   2  -7   89.82    6.03
  12   3  -7   60.64    5.25
 -12  -5   7   18.74    7.35
  13  -5  -7   -0.54    5.37
  13  -4  -7   32.11    5.17
  13  -3  -7   37.86    4.67
  13  -2  -7  174.45    9.76
  13  -1  -7   19.56    3.16
  13  -1  -7   26.03    3.25
  13   0  -7  380.47   18.80
 -13  -1   7   20.69    4.89
  13   1  -7   27.52    3.26
  13   2  -7  108.87    6.99
  13   3  -7   28.97    4.09
 -13  -5   7    7.23    6.84
  14  -5  -7   39.01    6.62
  14  -4  -7    6.29    4.84
  14  -3  -7   38.52    5.06
  14  -2  -7   42.17    5.05
  14  -1  -7   17.35    3.32
  14   0  -7  105.20    6.74
  14   1  -7   25.49    3.56
  14   2  -7   34.99    4.58
  14   3  -7   38.78    4.67
 -14  -5   7   36.96    7.83
  15  -5  -7   11.31    6.33
  15  -4  -7   18.48    5.57
  15  -3  -7  110.04    8.19
  15  -2  -7   94.30    7.08
  15  -1  -7  136.10    8.31
  15   0  -7  100.21    6.75
  15   1  -7  125.93    7.96
  15   2  -7   81.77    6.41
  15   3  -7  116.28    8.08
  16  -4  -7   18.37    6.03
  16  -3  -7   28.23    5.41
  16  -2  -7   99.19    7.59
  16  -1  -7   14.84    3.89
  16   0  -7    1.54    3.47
  16   1  -7   17.02    3.97
  16   2  -7   84.23    6.87
  16   3  -7   11.36    4.68
  17  -3  -7   19.86    5.67
  17  -2  -7   79.57    7.32
  17  -1  -7   97.49    7.34
  17   0  -7   39.86    4.86
  17   1  -7  112.18    8.03
  17   2  -7   63.85    6.60
  17   3  -7   12.61    5.03
  18  -2  -7   35.09    5.81
  18  -1  -7   56.62    6.34
  18   0  -7   10.84    4.43
  18   1  -7   49.18    5.79
  18   2  -7   28.41    5.35
  18   3  -7    6.13    5.47
  19  -1  -7   -1.97    4.79
  19   0  -7  100.82    8.13
  19   1  -7   -1.09    4.78
  19   2  -7  102.42    8.78
  15   2   8    3.72    7.80
  15  -2   8   -6.47    4.99
  14   3   8    1.56    7.26
  14   2   8  127.29   13.06
  14   1   8   13.04    7.27
  14  -1   8    2.12    3.98
  14  -2   8   96.93    8.23
  14  -3   8   -5.16    6.41
  13   3   8   42.49    8.34
  13   2   8   39.96    7.93
  13   1   8   23.19    7.15
  13  -1   8   21.24    4.01
  13  -2   8   16.61    4.93
  13  -3   8   60.81    7.84
  12   4   8    7.67    6.90
  12   3   8   40.38    7.73
  12   2   8   48.36    7.89
  12   1   8   20.94    6.48
  12   0   8   -4.00    5.30
  12  -1   8    8.41    3.62
  12  -2   8   60.36    6.77
  12  -3   8   47.03    7.33
  12  -4   8   -0.95    7.62
  11   4   8   10.79    6.46
  11   3   8    2.53    5.93
  11   2   8   37.16    6.79
  11   1   8  184.95   13.85
  11   0   8   28.72    5.81
  11   0   8   22.53    3.52
  11  -1   8  169.16    9.79
  11  -2   8   31.03    4.93
  11  -3   8    7.84    5.80
  11  -4   8    8.17    7.56
  10   5   8    6.09    6.39
  10   4   8   51.75    7.62
  10   3   8   65.48    8.49
  10   2   8  134.85   11.19
  10   1   8   17.39    5.16
  10   0   8  176.99    9.83
  10   0   8  186.12   12.96
  10  -1   8   14.17    3.34
  10  -1   8   13.32    4.40
  10  -2   8  130.44    9.08
  10  -3   8   79.61    8.67
  10  -4   8   51.80    8.55
  10  -5   8    3.61    8.74
   9   5   8    1.33    5.66
   9   4   8   24.51    6.04
   9   3   8    2.92    4.88
   9   2   8  278.35   18.25
   9   1   8    4.28    4.14
   9   0   8  268.00   14.06
   9   0   8  293.26   17.85
   9  -1   8    8.63    3.62
   9  -1   8    9.87    2.91
   9  -2   8  270.07   14.87
   9  -3   8    0.04    4.85
   9  -4   8   23.35    7.13
   9  -5   8    1.89    8.43
   8   5   8    0.05    5.36
   8   4   8   13.69    5.24
   8   3   8   15.47    4.94
   8   2   8  230.01   15.34
   8   1   8    4.77    3.81
   8   0   8  467.18   22.65
   8   0   8  467.34   27.93
   8  -1   8    1.90    2.56
   8  -1   8    3.00    2.90
   8  -2   8  240.09   14.34
   8  -2   8  217.12   12.99
   8  -3   8   36.08    5.89
   8  -4   8   17.75    6.82
   8  -5   8   -1.95    8.00
   7   6   8    8.09    5.90
   7   5   8   12.45    5.39
   7   4   8   12.89    4.94
   7   3   8   80.19    7.88
   7   2   8  152.09   10.92
   7   1   8  324.42   19.99
   7   0   8  788.87   45.80
   7   0   8  785.00   37.44
   7  -1   8  272.72   14.40
   7  -1   8  286.10   16.90
   7  -2   8  123.51    8.38
   7  -2   8  116.77    8.01
   7  -3   8   51.95    6.52
   7  -4   8   27.32    7.15
   7  -5   8   22.38    8.97
   6   6   8    0.48    5.26
   6   5   8   25.82    5.54
   6   4   8   14.20    4.64
   6   3   8  377.66   23.36
   6   2   8   94.26    7.82
   6   1   8  202.05   13.04
   6   0   8   -1.04    2.19
   6   0   8   -0.26    1.68
   6  -1   8  151.68    8.93
   6  -1   8  163.88    9.97
   6  -2   8   81.25    6.89
   6  -2   8   79.94    5.83
   6  -3   8  391.30   23.02
   6  -3   8  376.43   21.14
   6  -4   8   15.09    6.49
   6  -5   8   40.64    9.63
   6  -6   8    4.45   12.00
   5   6   8    7.06    5.20
   5   5   8   31.07    5.45
   5   4   8   34.17    5.22
   5   3   8   98.84    7.71
  -5  -3  -8   79.69    6.19
   5   2   8  302.24   18.70
   5   1   8  242.07   15.06
   5   0   8   70.67    4.47
   5   0   8   68.42    5.35
   5  -1   8  228.48   12.05
   5  -1   8  226.74   13.65
   5  -2   8  285.95   17.04
   5  -2   8  283.02   15.59
   5  -3   8  104.79    9.22
   5  -3   8   92.54    7.27
   5  -4   8   52.70    8.29
   5  -5   8   47.48   10.71
   5  -6   8    7.58   13.94
   4   6   8   10.82    5.21
   4   5   8   81.02    7.81
   4   4   8   24.28    4.40
  -4  -4  -8   10.54    2.96
  -4  -3  -8   12.05    2.57
   4   3   8   15.02    3.53
   4   2   8  330.65   20.13
   4   1   8  246.79   15.10
   4   0   8   89.96    5.81
   4   0   8   76.95    4.87
   4  -1   8  236.63   13.00
   4  -1   8  260.70   14.86
   4  -2   8  372.02   18.86
   4  -2   8  340.21   20.96
   4  -3   8   13.02    3.23
   4  -3   8   10.28    5.14
   4  -4   8   14.73    7.09
   4  -4   8   13.09    4.21
   4  -5   8  173.75   17.10
   4  -6   8   26.34   17.51
   3   6   8    3.84    4.67
   3   5   8   39.04    5.83
   3   4   8   83.66    7.56
  -3  -4  -8  100.06    6.85
   3   3   8   13.16    3.23
  -3  -3  -8   12.68    2.49
  -3  -2  -8  576.73   32.60
   3   2   8  587.41   34.19
   3   1   8  241.22   14.63
   3   0   8 1345.25   67.44
   3   0   8 1519.64   82.11
   3  -1   8  232.65   11.82
   3  -1   8  208.95   13.10
   3  -2   8  604.33   35.22
   3  -3   8   12.27    3.28
   3  -4   8  111.89    9.17
   3  -5   8   88.91   14.66
   3  -6   8    3.93   21.77
   2   6   8    7.89    4.65
  -2  -5  -8   64.18    6.02
   2   5   8   77.21    6.97
  -2  -4  -8   73.55    5.86
   2   4   8   74.94    6.67
  -2  -3  -8  364.23   21.44
   2   3   8  383.75   22.54
  -2  -2  -8  296.44   17.75
   2   2   8  322.98   18.74
   2   1   8   58.39    4.60
   2   0   8    3.06    1.39
   2   0   8    2.44    1.31
   2  -1   8   61.86    4.57
   2  -2   8  329.34   19.78
   2  -3   8  398.67   24.16
   2  -4   8   81.50    7.67
   2  -5   8   66.81    7.85
   1   6   8    0.23    4.33
   1   5   8   85.83    7.67
  -1  -5  -8   92.01    7.15
   1   4   8  107.03    7.53
  -1  -4  -8   83.63    6.73
   1   3   8  420.63   24.59
  -1  -3  -8  404.36   23.57
   1   2   8  220.64   14.42
  -1  -2  -8  250.48   13.86
  -1  -1  -8  642.57   38.16
   1   1   8  730.22   39.70
   1   0   8   20.88    2.38
   1  -1   8  625.68   36.28
   1  -2   8  257.32   15.92
   1  -3   8  410.64   24.90
   1  -4   8   87.14    7.81
   1  -5   8   88.42    8.96
   0  -6  -8    8.90    4.15
   0   5   8   17.39    3.88
   0  -5  -8    9.66    3.25
   0  -4  -8  141.14    8.64
   0   4   8  116.63    8.96
   0   3   8  133.08    9.01
   0  -3  -8  134.66    8.60
   0  -2  -8   44.29    3.91
   0   2   8   45.26    4.33
   0  -1  -8  919.68   47.28
   0   1   8  782.58   48.93
   0   0   8   36.15    3.06
   0  -1   8  917.33   52.96
   0  -2   8   49.54    5.11
   0  -3   8  128.89    9.51
   0  -4   8  143.66   10.65
   0  -5   8    7.89    4.79
   0  -6   8    4.84    6.93
   1  -6  -8    0.85    4.00
  -1   5   8    4.09    3.35
   1  -5  -8    5.89    3.16
  -1   4   8   16.98    3.14
   1  -4  -8    8.78    2.67
   1  -3  -8  143.95    8.86
  -1   3   8  132.84    9.07
   1  -2  -8  257.35   13.49
  -1   2   8  198.50   13.71
  -1   1   8 2038.51  113.43
   1  -1  -8 1917.02  108.94
  -1   0   8  393.29   22.91
  -1  -1   8 2032.54  116.55
  -1  -2   8  264.07   16.57
  -1  -3   8  137.67   10.04
  -1  -4   8   10.55    4.01
  -1  -5   8    5.51    4.99
  -1  -6   8    6.75    7.35
   2  -7  -8   16.49    6.19
   2  -6  -8    6.08    4.51
   2  -5  -8   55.06    5.95
  -2   4   8  256.30   15.73
   2  -4  -8  254.67   15.42
   2  -3  -8   35.76    4.17
  -2   3   8   51.25    4.32
  -2   2   8  426.40   24.96
   2  -2  -8  447.04   20.15
   2  -2  -8  406.67   24.19
   2  -1  -8  272.55   15.02
   2  -1  -8  266.64   12.39
  -2   1   8  241.26   15.29
  -2   0   8  120.24    7.71
   2   0  -8  123.84    7.34
  -2  -1   8  270.23   16.57
  -2  -2   8  411.26   24.89
  -2  -3   8   36.16    5.28
  -2  -4   8  243.72   16.32
  -2  -5   8   54.69    7.50
  -2  -6   8    4.10    8.02
   3  -7  -8    6.35    6.29
   3  -6  -8   16.94    5.14
   3  -5  -8  105.32    8.41
  -3   4   8  189.51   11.60
   3  -4  -8  171.45   11.55
  -3   3   8   12.11    2.13
   3  -3  -8    6.39    1.36
   3  -3  -8    7.97    2.29
   3  -2  -8  520.00   30.73
  -3   2   8  533.59   31.67
   3  -2  -8  585.73   25.78
   3  -1  -8 1004.58   46.19
   3  -1  -8  954.44   54.54
  -3   1   8  990.07   56.41
  -3   0   8 2146.69  121.84
   3   0  -8 2132.00   99.84
   3   0  -8 2107.59  117.52
  -3  -1   8  952.03   55.29
  -3  -2   8  521.38   31.12
  -3  -3   8    5.59    3.37
  -3  -4   8  163.54   12.37
  -3  -5   8  115.23   11.40
  -3  -6   8   27.02    9.82
  -3  -7   8   -3.97   15.74
   4  -7  -8    5.55    6.38
   4  -6  -8    1.94    4.80
   4  -5  -8    4.22    3.69
   4  -4  -8  131.47    9.17
   4  -3  -8   88.85    4.93
   4  -3  -8   84.66    6.49
   4  -2  -8    5.08    0.97
   4  -2  -8    3.73    1.75
  -4   2   8    2.95    1.37
   4  -1  -8  904.22   41.14
   4  -1  -8  852.40   48.55
  -4   1   8  866.10   50.21
  -4   0   8   28.04    3.50
   4   0  -8   28.73    2.38
   4   0  -8   29.59    2.75
  -4  -1   8  888.10   51.73
  -4  -2   8    3.83    2.93
  -4  -3   8   79.92    7.58
  -4  -4   8  119.76   10.43
  -4  -5   8    1.67    6.27
  -4  -6   8   13.19   10.21
  -4  -7   8   13.60   17.23
   5  -7  -8   -0.67    6.19
   5  -6  -8    2.49    5.04
   5  -5  -8   30.72    5.06
   5  -4  -8   32.02    4.76
   5  -3  -8  393.38   17.70
   5  -3  -8  375.59   21.34
  -5   3   8  331.16   21.41
   5  -2  -8   82.14    6.17
   5  -2  -8   91.96    4.80
  -5   2   8   92.77    5.79
   5  -1  -8 1411.58   67.59
  -5   1   8 1534.47   82.49
   5  -1  -8 1375.15   79.56
   5   0  -8   58.05    3.69
  -5   0   8   63.43    5.21
   5   0  -8   59.99    4.24
  -5  -1   8 1390.21   82.80
   5   1  -8 1477.19   67.49
  -5  -2   8   79.53    7.27
  -5  -3   8  327.96   20.92
  -5  -4   8   36.74    6.42
  -5  -5   8   31.01    8.34
  -5  -6   8   12.83   10.94
  -5  -7   8   22.71   18.08
   6  -6  -8    0.79    5.16
   6  -5  -8   21.41    4.79
   6  -4  -8  268.07   16.55
   6  -3  -8   94.31    7.27
   6  -3  -8  100.40    5.65
   6  -2  -8  412.43   24.16
   6  -2  -8  434.35   20.20
   6  -1  -8   73.42    4.36
  -6   1   8   87.24    5.33
   6  -1  -8   75.72    5.47
   6   0  -8  200.54   11.63
   6   0  -8  200.84    9.92
  -6   0   8  197.32   12.52
   6   1  -8   82.19    4.72
  -6  -1   8   72.65    6.74
  -6  -2   8  391.17   24.05
  -6  -3   8   79.07    8.31
  -6  -4   8  260.73   18.36
  -6  -5   8   17.22    8.04
  -6  -6   8   -0.52   10.69
   7  -6  -8   47.56    7.08
   7  -5  -8    6.62    4.35
   7  -4  -8  178.26   12.39
   7  -4  -8  198.81   10.31
   7  -3  -8   86.71    7.06
   7  -3  -8   94.62    5.54
   7  -2  -8  351.56   16.81
   7  -2  -8  346.01   20.20
   7  -1  -8  388.76   19.18
  -7   1   8  423.88   23.36
   7  -1  -8  390.52   22.76
  -7   0   8  934.88   54.16
   7   0  -8  948.90   44.16
   7   0  -8  921.44   51.77
   7   1  -8  420.28   20.12
   7   1  -8  422.68   23.21
  -7  -1   8  405.40   25.13
  -7  -2   8  304.55   22.36
   7   2  -8  414.73   17.82
  -7  -3   8   78.86    8.43
  -7  -4   8  176.38   14.28
  -7  -5   8    6.59    7.70
  -7  -6   8   65.02   13.30
   8  -6  -8    0.11    5.33
   8  -5  -8   14.56    4.77
   8  -4  -8   78.23    7.31
   8  -4  -8   92.08    6.24
   8  -3  -8   75.85    4.94
   8  -3  -8   66.81    6.16
   8  -2  -8  165.97   10.57
   8  -2  -8  169.82    8.61
  -8   1   8   72.55    4.98
   8  -1  -8   69.31    4.22
   8  -1  -8   70.19    5.24
   8   0  -8    1.59    1.29
  -8   0   8    0.18    2.33
   8   0  -8    2.74    1.46
  -8  -1   8   66.14    6.91
   8   1  -8   82.17    4.82
   8   1  -8   77.76    4.84
  -8  -2   8  161.75   11.64
   8   2  -8  153.06    8.35
  -8  -3   8   56.11    7.76
  -8  -4   8   71.27    9.81
  -8  -5   8   19.58    8.30
  -8  -6   8    6.98   10.43
   9  -6  -8   12.54    5.90
   9  -5  -8    2.67    4.51
   9  -4  -8   41.53    5.96
   9  -3  -8  351.93   21.24
   9  -3  -8  367.76   17.77
   9  -2  -8  319.55   15.75
   9  -2  -8  324.73   18.90
   9  -1  -8  208.81   12.37
   9  -1  -8  207.73   10.43
  -9   0   8  566.70   33.73
   9   0  -8  580.69   32.02
   9   0  -8  573.81   27.42
  -9  -1   8  199.09   12.56
   9   1  -8  175.17    9.46
   9   1  -8  177.12   10.49
   9   2  -8  318.01   15.30
  -9  -2   8  291.46   19.67
  -9  -3   8  311.45   20.65
  -9  -4   8   37.41    7.37
  -9  -5   8    1.24    7.88
  -9  -6   8   13.88   10.64
  10  -6  -8    2.80    5.75
  10  -5  -8   33.23    5.83
  10  -4  -8   46.20    6.43
  10  -4  -8   55.59    5.32
  10  -3  -8  154.04   10.70
  10  -3  -8  161.49    8.75
  10  -2  -8   28.04    3.33
  10  -2  -8   27.85    4.22
  10  -1  -8   22.44    2.76
  10  -1  -8   24.65    2.96
  10   0  -8  414.35   23.10
  10   0  -8  411.80   19.88
 -10   0   8  403.68   24.53
  10   1  -8   24.87    2.59
 -10  -1   8   19.07    4.27
  10   2  -8   30.92    3.70
 -10  -2   8   27.21    5.32
 -10  -3   8  139.89   11.83
 -10  -4   8   39.59    7.58
 -10  -5   8   35.40    8.93
 -10  -6   8    3.31    9.64
  11  -5  -8   15.87    5.41
  11  -4  -8   36.35    4.62
  11  -4  -8   33.36    5.32
  11  -3  -8  427.52   20.63
  11  -3  -8  407.41   24.52
  11  -2  -8   26.40    3.52
  11  -2  -8   22.17    2.92
  11  -1  -8  587.13   28.86
  11  -1  -8  618.97   33.96
 -11   0   8    8.25    3.14
  11   0  -8    7.15    1.78
  11   0  -8    8.90    2.12
 -11  -1   8  572.20   36.17
  11   1  -8  638.52   29.21
  11   2  -8   16.53    2.87
 -11  -2   8   25.33    5.19
 -11  -3   8  349.20   23.27
  11   3  -8  363.10   17.95
 -11  -4   8   28.20    7.01
 -11  -5   8   16.60    7.88
  12  -5  -8   -0.70    4.86
  12  -5  -8    2.25    5.17
  12  -4  -8    3.09    4.33
  12  -4  -8    3.36    4.09
  12  -3  -8   35.22    5.44
  12  -3  -8   42.37    4.71
  12  -2  -8  193.88   10.43
  12  -2  -8  198.49   12.44
  12  -1  -8   56.79    4.42
  12  -1  -8   52.66    4.83
  12   0  -8   10.99    2.37
  12   1  -8   47.79    4.39
 -12  -1   8   59.10    6.93
  12   2  -8  170.02    9.59
 -12  -2   8  179.21   13.12
  12   3  -8   26.39    3.70
 -12  -3   8   28.00    6.17
 -12  -4   8    6.79    6.21
 -12  -5   8    1.66    7.19
  13  -5  -8    6.18    5.68
  13  -5  -8    6.37    5.23
  13  -4  -8   87.91    7.30
  13  -3  -8   21.85    4.02
  13  -2  -8  344.29   20.02
  13  -2  -8  328.44   16.91
  13  -1  -8   60.94    5.33
  13  -1  -8   59.47    4.82
  13   0  -8  357.21   17.74
  13   1  -8   53.26    4.70
 -13  -1   8   62.80    7.53
 -13  -2   8  309.27   20.98
  13   2  -8  331.59   16.36
 -13  -3   8   16.17    5.98
  13   3  -8   21.03    3.75
 -13  -4   8   59.04    9.17
 -13  -5   8    4.88    7.10
  14  -5  -8   18.80    6.54
  14  -5  -8   19.37    5.98
  14  -4  -8   18.92    5.12
  14  -3  -8  136.44    8.72
  14  -2  -8   14.98    3.72
  14  -2  -8   17.78    3.68
  14  -1  -8  166.90    9.32
  14   0  -8   29.27    3.85
  14   1  -8  154.17    8.87
 -14  -2   8   14.86    5.63
  14   2  -8   17.99    3.54
  14   3  -8  135.22    8.28
 -14  -3   8  113.65   11.41
 -14  -4   8   17.97    6.74
 -14  -5   8   12.63    7.41
  15  -5  -8    3.51    6.04
  15  -4  -8    6.07    5.16
  15  -3  -8   98.50    7.71
  15  -2  -8   73.20    6.31
  15  -2  -8   74.34    7.01
  15  -1  -8  218.53   11.77
  15   0  -8   77.72    5.88
  15   1  -8  244.14   13.00
 -15  -2   8   58.16    8.81
  15   2  -8   66.92    5.76
  15   3  -8   91.11    7.12
 -15  -3   8   85.41    9.99
 -15  -4   8    5.44    6.38
  16  -4  -8    0.70    5.48
  16  -4  -8   -0.54    5.57
  16  -3  -8   18.09    5.07
  16  -2  -8   43.22    5.22
  16  -1  -8   49.37    5.36
  16   0  -8    0.80    3.37
  16   1  -8   42.72    5.19
  16   2  -8   28.97    4.57
 -16  -3   8   14.55    6.30
  16   3  -8   15.93    4.63
 -16  -4   8    3.33    6.14
  17  -4  -8   15.14    6.61
  17  -3  -8   13.07    5.35
  17  -2  -8    4.98    4.50
  17  -1  -8  111.37    7.80
  17   0  -8   27.63    4.37
  17   1  -8  103.13    7.59
  17   2  -8    2.79    4.16
  17   3  -8   32.33    5.56
 -17  -4   8   15.04    6.86
  18  -2  -8   30.02    5.59
  18  -1  -8    8.95    4.41
  18   0  -8   10.57    4.29
  18   1  -8    8.49    4.40
  18   2  -8   37.21    5.51
  18   3  -8   11.99    5.54
  19  -1  -8    1.52    4.71
  19   0  -8   77.11    7.40
  19   1  -8    2.43    4.71
  15   2   9   68.67   10.59
  15  -2   9   51.85    6.49
  14   2   9   12.40    7.85
  14   1   9    2.43    7.28
  14  -2   9   -3.45    4.85
  14  -3   9    2.08    6.73
  13   3   9    4.44    7.48
  13   2   9  139.90   13.29
  13   1   9   26.71    7.37
  13  -2   9   91.31    8.25
  13  -3   9    9.00    6.59
  12   3   9   20.88    7.34
  12   2   9   30.34    7.41
  12   1   9   50.34    7.84
  12   0   9   67.75    9.26
  12  -1   9   27.04    4.16
  12  -2   9   31.95    5.26
  12  -3   9   18.46    6.70
  12  -4   9   13.52    8.52
  11   4   9    9.35    6.80
  11   3   9   52.46    8.11
  11   2   9    8.67    6.07
  11   1   9  352.31   22.71
  11   0   9    8.30    5.31
  11  -1   9  280.02   14.70
  11  -2   9   12.39    4.63
  11  -3   9   57.97    7.52
  11  -4   9   18.59    8.14
  10   4   9    7.74    6.39
  10   3   9   32.83    6.81
  10   2   9    0.76    5.17
  10   1   9   10.80    5.19
  10   0   9   12.22    4.77
  10  -1   9    5.88    3.20
  10  -1   9   12.07    4.47
  10  -2   9   -2.74    3.93
  10  -3   9   28.22    6.24
  10  -4   9    8.22    7.51
   9   5   9    4.45    6.18
   9   4   9   29.53    6.61
   9   3   9    7.53    5.45
   9   2   9  234.83   16.14
   9   1   9   76.04    8.01
   9   0   9  273.36   16.97
   9   0   9  253.60   13.30
   9  -1   9   60.26    5.52
   9  -1   9   63.24    6.53
   9  -2   9  201.79   12.27
   9  -2   9  212.30   13.55
   9  -3   9   18.41    5.66
   9  -4   9   53.24    8.73
   9  -5   9   11.83    9.30
   8   5   9   16.42    6.33
   8   4   9    4.65    5.37
   8   3   9   30.40    5.88
   8   2   9   43.03    5.89
   8   1   9   -1.55    3.77
   8   0   9    5.60    2.45
   8   0   9    9.46    3.65
   8  -1   9   -0.68    2.98
   8  -1   9    1.97    2.66
   8  -2   9   32.16    4.71
   8  -2   9   43.80    4.90
   8  -3   9   36.88    6.19
   8  -4   9    7.40    6.97
   8  -5   9   23.86   10.03
   7   5   9    4.33    5.47
   7   4   9   84.84    8.72
   7   3   9   38.49    5.76
   7   2   9  342.93   21.46
   7   1   9  150.65   10.66
   7   0   9  552.67   26.79
   7   0   9  562.79   32.86
   7  -1   9  150.90    8.82
   7  -1   9  154.05    9.97
   7  -2   9  300.84   16.34
   7  -2   9  297.87   18.03
   7  -3   9   78.90    8.70
   7  -3   9   75.79    6.53
   7  -4   9  101.33   11.51
   7  -5   9    1.92    9.32
   6   6   9   13.13    6.26
   6   5   9   14.07    5.49
   6   4   9   10.97    4.89
   6   3   9   10.98    4.28
   6   2   9   26.67    4.43
   6   1   9   86.74    7.32
   6   0   9   55.30    5.04
   6   0   9   57.01    4.17
   6  -1   9   79.03    5.65
   6  -1   9   66.80    5.38
   6  -2   9   14.80    2.79
   6  -2   9   17.71    3.92
   6  -3   9   10.67    3.22
   6  -3   9    8.42    5.10
   6  -4   9   10.83    6.94
   6  -5   9   17.80    9.82
   5   6   9   17.54    6.05
   5   5   9   19.36    5.38
   5   4   9   53.79    6.81
   5   3   9   38.75    5.90
   5   2   9   80.14    7.21
   5   1   9  510.17   30.16
   5   0   9   -0.41    1.99
   5   0   9   -1.18    1.54
   5  -1   9  369.72   21.65
   5  -1   9  365.87   18.52
   5  -2   9   52.81    6.19
   5  -2   9   59.58    4.89
   5  -3   9   78.97    6.79
   5  -3   9   96.19    9.27
   5  -4   9   94.63   11.66
   5  -5   9   59.48   12.34
   5  -6   9   41.98   17.64
   4   6   9   16.08    5.58
   4   5   9   17.24    4.91
  -4  -4  -9  127.06    8.65
   4   4   9  130.30    9.96
  -4  -3  -9   62.78    5.12
   4   3   9   56.62    6.34
   4   2   9   24.55    3.80
   4   1   9    8.09    2.48
   4   0   9   77.81    4.96
   4   0   9   91.52    6.02
   4  -1   9    5.16    2.32
   4  -1   9    8.45    1.91
   4  -2   9   22.01    3.51
   4  -2   9   24.52    4.55
   4  -3   9   74.73    8.98
   4  -3   9   67.06    6.07
   4  -4   9  146.92   11.31
   4  -4   9  188.92   14.73
   4  -5   9   45.87   12.90
   4  -6   9   30.61   20.99
   3   6   9   21.10    5.59
   3   5   9   10.35    4.45
  -3  -4  -9   71.66    6.23
   3   4   9   90.86    7.49
  -3  -3  -9   63.53    5.23
   3   3   9   62.23    6.37
   3   2   9  610.01   33.13
  -3  -2  -9  512.69   31.43
   3   1   9  246.48   14.98
   3   0   9 1462.95   79.41
   3   0   9 1305.65   65.23
   3  -1   9  244.02   12.48
   3  -1   9  221.19   13.87
   3  -2   9  533.43   31.24
   3  -3   9   78.93    6.96
   3  -4   9   88.42    8.20
   3  -5   9   26.46   14.41
   3  -6   9   85.75   29.59
   2   6   9   10.13    4.91
  -2  -5  -9   36.95    4.93
   2   5   9   39.64    5.90
  -2  -4  -9   16.04    3.08
   2   4   9   11.14    3.76
   2   3   9   14.81    3.54
  -2  -3  -9   26.03    3.64
   2   2   9   32.96    4.53
  -2  -2  -9   28.09    3.45
   2   1   9   82.38    5.99
   2   0   9   91.33    5.53
   2   0   9  100.92    6.36
   2  -1   9   90.69    6.22
   2  -2   9   31.36    4.07
   2  -3   9   32.84    5.22
   2  -4   9   18.39    4.46
   2  -5   9   39.82    6.25
  -1  -5  -9   13.57    3.50
   1   5   9   12.63    4.07
  -1  -4  -9   12.31    3.01
   1   4   9   19.60    3.78
   1   3   9  240.02   15.64
  -1  -3  -9  262.98   14.99
  -1  -2  -9   71.17    5.36
   1   1   9  920.49   53.79
  -1  -1  -9  947.37   51.80
   1   0   9  441.50   25.67
   1  -1   9  960.23   55.34
   1  -2   9   79.23    6.39
   1  -3   9  276.01   17.50
   1  -4   9   15.41    4.32
   1  -5   9   19.86    5.40
   0  -6  -9    8.36    4.15
   0  -5  -9   22.39    3.88
   0   5   9   29.74    4.54
   0   4   9  116.38    8.75
   0  -4  -9  123.99    8.25
   0   3   9   60.97    5.77
   0  -3  -9   70.72    5.50
   0   2   9  288.98   17.43
   0  -2  -9  288.04   16.79
   0   1   9  237.34   14.09
   0  -1  -9  233.07   13.66
   0   0   9   10.09    1.63
   0  -1   9  239.29   14.58
   0  -2   9  299.78   18.53
   0  -3   9   78.15    7.27
   0  -4   9  128.57   10.06
   0  -5   9   28.05    5.78
   0  -6   9    5.37    6.84
   1  -6  -9   13.35    4.52
  -1   5   9   71.67    6.96
   1  -5  -9   78.54    6.66
   1  -4  -9   46.17    4.90
  -1   4   9   49.79    5.24
   1  -3  -9  474.49   27.81
  -1   3   9  504.54   28.86
   1  -2  -9  216.11   14.49
  -1   2   9  278.89   15.09
   1  -1  -9 1148.45   68.30
  -1   1   9 1321.09   70.87
  -1   0   9  649.65   37.54
  -1  -1   9 1273.86   73.40
  -1  -2   9  227.27   14.66
  -1  -3   9  486.09   29.38
  -1  -4   9   45.76    6.44
  -1  -5   9   77.43    8.80
  -1  -6   9   17.69    7.59
   2  -7  -9    8.40    5.86
   2  -6  -9    8.91    4.53
   2  -5  -9   24.68    4.14
   2  -4  -9   16.83    3.17
   2  -3  -9    2.49    2.03
  -2   3   9    1.67    2.14
  -2   2   9   97.97    6.50
   2  -2  -9   87.05    6.42
   2  -1  -9   65.90    4.36
  -2   1   9   47.96    4.15
   2   0  -9  242.22   13.86
  -2   0   9  242.23   14.50
  -2  -1   9   65.46    5.67
  -2  -2   9   87.40    7.34
  -2  -3   9    2.60    3.25
  -2  -4   9   17.35    4.53
  -2  -5   9   24.20    6.02
  -2  -6   9   13.78    7.87
  -2  -7   9   20.40   13.36
   3  -7  -9    7.05    6.03
   3  -6  -9   31.33    5.72
   3  -5  -9   12.06    3.92
  -3   4   9   12.47    2.98
   3  -4  -9   18.55    3.38
   3  -3  -9  179.99   11.23
  -3   3   9  184.17   11.42
   3  -2  -9  616.78   28.27
   3  -2  -9  582.08   33.74
   3  -1  -9   92.19    6.54
  -3   1   9  104.19    6.41
  -3   0   9 1535.95   87.67
   3   0  -9 1520.16   84.26
  -3  -1   9   97.48    7.47
  -3  -2   9  586.89   34.98
  -3  -3   9  175.47   12.38
  -3  -4   9   16.77    4.91
  -3  -5   9   12.75    6.08
  -3  -6   9   42.85    9.84
  -3  -7   9    8.90   14.49
   4  -7  -9    3.54    6.40
   4  -6  -9    4.16    4.78
   4  -5  -9   14.28    4.12
   4  -4  -9   32.51    4.82
   4  -3  -9  115.09    8.65
  -4   3   9  142.79    8.48
   4  -2  -9   84.44    6.16
   4  -2  -9   87.25    4.57
  -4   2   9   88.01    5.92
   4  -1  -9  216.28   13.30
   4  -1  -9  238.38   10.98
  -4   1   9  223.14   13.47
   4   0  -9  147.99    7.53
  -4   0   9  151.98    9.56
   4   0  -9  146.75    8.91
  -4  -1   9  229.29   14.63
  -4  -2   9   88.62    7.82
  -4  -3   9  108.81    9.08
  -4  -4   9   31.01    5.78
  -4  -5   9   13.01    6.52
  -4  -6   9    3.10    8.96
  -4  -7   9  -10.54   14.85
   5  -6  -9    0.12    4.96
   5  -5  -9   75.62    7.50
   5  -4  -9    5.75    3.12
  -5   3   9  393.60   23.37
   5  -3  -9  408.36   19.11
   5  -3  -9  394.61   23.14
   5  -2  -9  290.15   17.42
   5  -2  -9  308.65   14.40
   5  -1  -9  739.80   35.45
  -5   1   9  805.16   43.28
   5  -1  -9  707.72   41.88
   5   0  -9  555.16   26.40
  -5   0   9  557.99   32.49
   5   0  -9  552.01   31.00
  -5  -1   9  738.20   44.16
   5   1  -9  765.84   35.71
  -5  -2   9  294.22   18.69
  -5  -3   9  357.70   22.59
  -5  -4   9    8.77    5.15
  -5  -5   9   72.64   10.68
  -5  -6   9   11.46   10.34
   6  -6  -9    6.21    5.26
   6  -5  -9   26.36    4.98
   6  -4  -9   68.07    6.37
   6  -3  -9  134.64    7.02
   6  -3  -9  128.65    9.01
   6  -2  -9   23.52    2.29
  -6   2   9   20.20    2.64
   6  -2  -9   23.96    3.64
  -6   1   9  225.74   12.07
   6  -1  -9  186.80    9.84
   6  -1  -9  186.52   11.86
   6   0  -9  124.66    7.77
  -6   0   9  127.05    8.72
   6   0  -9  129.64    6.68
   6   1  -9  215.99   10.29
  -6  -1   9  186.43   13.30
  -6  -2   9   23.60    4.31
  -6  -3   9  124.71   10.29
  -6  -4   9   71.31    9.22
  -6  -5   9   21.08    7.94
  -6  -6   9   -6.08   10.08
   7  -6  -9   28.89    6.37
   7  -5  -9   15.58    4.72
   7  -4  -9  110.98    8.67
   7  -3  -9  145.21    9.88
   7  -3  -9  150.32    7.84
   7  -2  -9  355.15   16.87
   7  -2  -9  345.02   20.33
   7  -1  -9  232.96   13.53
   7  -1  -9  227.34   11.29
   7   0  -9 1364.51   75.33
   7   0  -9 1397.10   64.22
  -7   0   9 1330.36   78.59
   7   1  -9  147.57    7.85
  -7  -2   9  332.41   20.93
  -7  -3   9  136.03   11.22
  -7  -4   9  109.15   11.20
  -7  -5   9   14.77    8.18
  -7  -6   9   40.88   12.32
   8  -6  -9    4.82    5.58
   8  -5  -9   16.58    4.94
   8  -4  -9   -1.68    3.38
   8  -3  -9  134.03    7.35
   8  -3  -9  134.37    9.39
   8  -2  -9  263.91   13.11
   8  -2  -9  270.77   15.88
  -8   1   9  130.79    8.46
   8  -1  -9  136.26    7.08
   8  -1  -9  137.55    8.51
   8   0  -9  460.50   22.24
  -8   0   9  470.71   27.50
   8   0  -9  457.35   26.02
   8   1  -9  129.80    7.42
   8   1  -9  138.99    8.09
  -8  -1   9  142.01   10.03
   8   2  -9  257.61   12.96
  -8  -2   9  252.24   16.88
  -8  -3   9  109.67   10.19
  -8  -4   9    3.64    5.94
  -8  -5   9   11.72    8.19
  -8  -6   9  -11.53   10.28
   9  -6  -9   23.33    6.45
   9  -5  -9   25.57    5.48
   9  -4  -9  145.28    8.15
   9  -4  -9  124.16   10.07
   9  -3  -9   67.91    4.79
   9  -3  -9   61.33    6.18
   9  -2  -9  761.40   36.64
   9  -2  -9  784.06   43.45
   9  -1  -9   31.08    3.07
   9  -1  -9   33.67    3.74
   9   0  -9 1026.37   48.04
   9   0  -9 1021.21   56.26
  -9   0   9  998.86   58.86
   9   1  -9   60.62    4.30
   9   1  -9   59.97    4.16
  -9  -2   9  720.60   44.09
   9   2  -9  759.04   35.49
  -9  -3   9   49.68    6.98
  -9  -4   9  109.48   11.42
  -9  -5   9   21.43    8.71
  -9  -6   9   32.09   11.41
  10  -6  -9    4.24    5.88
  10  -5  -9   32.71    5.93
  10  -4  -9   47.57    6.44
  10  -4  -9   49.11    5.18
  10  -3  -9  106.31    8.47
  10  -3  -9  118.11    6.84
  10  -2  -9   10.53    2.83
  10  -2  -9   11.48    2.26
  10  -1  -9  169.49   10.52
  10  -1  -9  170.99    8.85
  10   0  -9    1.68    1.83
  10   0  -9    1.88    1.57
 -10   0   9    1.88    2.72
  10   1  -9  166.42    9.04
 -10  -1   9  173.43   12.00
 -10  -2   9   10.96    4.55
  10   2  -9    9.88    2.50
 -10  -3   9   96.62    9.99
 -10  -4   9   40.68    7.88
 -10  -5   9   23.75    8.67
 -10  -6   9   10.15   10.30
  11  -5  -9   24.36    5.78
  11  -4  -9   49.80    6.63
  11  -4  -9   49.65    5.47
  11  -3  -9   16.93    4.01
  11  -3  -9   24.93    3.30
  11  -2  -9   12.55    2.55
  11  -2  -9   13.70    3.08
  11  -1  -9  363.08   18.06
  11  -1  -9  376.69   21.30
  11   0  -9  303.75   17.33
 -11   0   9  296.07   18.64
  11   0  -9  307.88   15.05
 -11  -1   9  360.88   21.29
  11   1  -9  314.68   16.68
 -11  -2   9   13.03    4.89
  11   2  -9   12.19    2.73
 -11  -3   9   15.52    5.92
 -11  -4   9   36.22    7.68
 -11  -5   9   18.60    8.32
  12  -5  -9   37.08    6.54
  12  -4  -9    0.24    3.93
  12  -4  -9    4.48    4.44
  12  -3  -9   41.56    6.01
  12  -3  -9   49.15    4.96
  12  -2  -9   60.88    4.92
  12  -2  -9   58.15    5.88
  12  -1  -9  128.59    7.45
  12  -1  -9  136.44    8.70
  12   0  -9    3.56    2.24
 -12  -1   9  141.94   10.52
  12   1  -9  120.31    7.45
  12   2  -9   55.82    4.75
 -12  -2   9   52.39    7.74
 -12  -3   9   37.59    6.87
  12   3  -9   26.11    3.78
 -12  -4   9    0.51    6.46
 -12  -5   9   28.09    8.61
  13  -5  -9   27.65    6.49
  13  -4  -9   86.78    7.10
  13  -4  -9   85.19    8.57
  13  -3  -9    5.76    3.90
  13  -3  -9    8.02    3.50
  13  -2  -9  181.55   11.78
  13  -2  -9  176.94    9.84
  13  -1  -9   64.13    4.99
  13  -1  -9   63.65    5.44
  13   0  -9  338.99   16.91
  13   1  -9   54.03    4.71
 -13  -1   9   53.70    7.40
  13   2  -9  210.42   10.63
 -13  -2   9  167.23   14.23
 -13  -3   9    0.72    5.89
  13   3  -9    4.90    3.30
 -13  -4   9   64.00    9.86
 -13  -5   9   26.33    8.42
  14  -5  -9    0.85    5.94
  14  -4  -9   11.91    5.27
  14  -4  -9   11.43    4.74
  14  -3  -9   42.83    4.77
  14  -3  -9   36.55    5.39
  14  -2  -9   91.80    7.52
  14  -2  -9   88.74    6.49
  14  -1  -9   22.54    3.35
  14   0  -9   17.48    3.15
  14   1  -9   16.16    3.18
 -14  -2   9   85.76    9.76
  14   2  -9   87.62    6.37
 -14  -3   9   32.63    7.13
  14   3  -9   42.59    5.15
 -14  -4   9   10.99    6.73
 -14  -5   9    0.32    7.27
  15  -4  -9    4.55    5.31
  15  -4  -9    3.03    4.91
  15  -3  -9   38.58    5.66
  15  -3  -9   42.55    5.23
  15  -2  -9   46.00    5.31
  15  -2  -9   38.94    5.86
  15  -1  -9   88.41    6.27
  15   0  -9   37.91    4.53
  15   1  -9   75.96    5.91
  15   2  -9   56.67    5.34
 -15  -2   9   34.64    7.15
 -15  -3   9   27.16    7.13
  15   3  -9   27.59    4.61
 -15  -4   9    5.86    6.73
  16  -4  -9   12.43    5.59
  16  -4  -9    6.40    5.90
  16  -3  -9   22.35    5.04
  16  -3  -9   22.25    5.28
  16  -2  -9   14.02    4.27
  16  -1  -9  113.45    7.54
  16   0  -9   37.85    4.79
  16   1  -9  112.30    7.56
  16   2  -9    5.73    3.85
  16   3  -9   24.54    4.82
 -16  -3   9   17.77    6.87
 -16  -4   9    5.32    6.69
  17  -4  -9   24.49    6.79
  17  -3  -9   57.47    7.28
  17  -2  -9   34.07    5.15
  17  -1  -9  117.97    8.02
  17   0  -9    4.41    3.62
  17   1  -9  106.74    7.69
  17   2  -9   39.99    5.21
  17   3  -9   51.28    6.65
 -17  -4   9   21.58    7.57
  18  -3  -9   12.07    5.74
  18  -2  -9   28.66    5.31
  18  -1  -9    2.69    4.16
  18   0  -9   56.70    6.04
  18   1  -9    8.01    4.31
  18   2  -9   32.14    5.33
  19  -1  -9   12.31    4.88
  19   0  -9   16.29    4.79
  19   1  -9    9.12    4.87
  14   2  10   14.02    8.29
  14   1  10    5.48    7.59
  13   3  10   -1.86    7.35
  13   2  10   12.90    7.59
  13   1  10   12.88    7.24
  13  -2  10   11.25    5.15
  13  -3  10    2.04    6.67
  12   3  10    4.02    7.15
  12   2  10   22.78    7.35
  12   1  10    6.46    6.37
  12   0  10   40.26    7.37
  12  -2  10   16.79    4.99
  12  -3  10    0.75    6.45
  11   4  10   -2.09    6.94
  11   3  10   65.98    9.75
  11   2  10   10.69    6.30
  11   1  10  240.26   16.85
  11   0  10    2.22    5.31
  11  -1  10  312.44   20.34
  11  -2  10    6.17    4.61
  11  -3  10   71.03    9.16
  11  -4  10    0.04    8.23
  10   4  10   22.96    7.21
  10   3  10    7.26    6.23
  10   2  10   13.05    5.95
  10   1  10   17.51    5.66
  10   0  10    5.48    4.87
  10  -1  10    1.81    3.20
  10  -1  10    4.62    4.58
  10  -2  10   15.55    4.51
  10  -3  10    2.03    5.66
  10  -4  10   30.01    8.81
   9   4  10   17.55    6.66
   9   3  10   11.44    5.83
   9   2  10   32.53    6.05
   9   1  10  350.62   22.09
   9   0  10   50.11    6.70
   9  -1  10  301.04   16.03
   9  -1  10  321.00   19.40
   9  -2  10   18.69    4.18
   9  -2  10   14.30    4.28
   9  -3  10    9.18    5.61
   9  -4  10   21.64    8.02
   8   5  10   14.78    6.71
   8   4  10    1.55    5.64
   8   3  10    9.71    5.40
   8   2  10   77.84    8.09
   8   1  10   32.40    5.16
   8   0  10  205.61   13.56
   8  -1  10   24.74    3.88
   8  -1  10   22.06    3.43
   8  -2  10   79.56    7.33
   8  -2  10   79.22    6.82
   8  -3  10    9.92    5.50
   8  -4  10    9.58    7.67
   8  -5  10   12.41   10.58
   7   5  10    7.30    5.92
   7   4  10   19.46    6.01
   7   3  10   91.36    8.88
   7   2  10  141.91   10.94
   7   1  10   75.84    7.13
   7   0  10  340.28   16.56
   7   0  10  330.42   20.34
   7  -1  10   86.20    6.59
   7  -1  10   82.84    6.15
   7  -2  10  123.64    8.62
   7  -2  10  125.23    8.98
   7  -3  10  103.57    8.12
   7  -3  10  108.77   10.10
   7  -4  10   23.16    8.11
   7  -5  10    0.89   10.17
   6   6  10    1.50    6.23
   6   5  10    4.32    5.45
   6   4  10   56.48    7.68
   6   3  10   86.02    8.46
   6   2  10   20.39    4.51
   6   1  10   73.12    6.81
   6   0  10   10.36    2.78
   6   0  10    8.92    2.11
   6  -1  10   75.20    5.79
   6  -1  10   81.48    5.94
   6  -2  10   12.18    3.93
   6  -2  10   11.72    2.78
   6  -3  10   99.96    9.77
   6  -3  10   91.20    7.47
   6  -4  10   94.14   11.98
   6  -5  10    7.41   10.71
   5   6  10   22.44    6.43
   5   5  10    2.95    5.11
   5   4  10    9.19    4.82
   5   3  10  201.89   13.85
   5   2  10   29.33    4.52
   5   1  10  582.87   34.32
   5   0  10    0.27    2.15
   5   0  10   -0.78    1.64
   5  -1  10  506.88   29.35
   5  -1  10  497.91   24.79
   5  -2  10   29.03    3.76
   5  -2  10   26.43    4.58
   5  -3  10  235.61   14.81
   5  -3  10  205.98   13.84
   5  -4  10   10.38    8.31
   5  -4  10    7.78    4.36
   5  -5  10    9.72   11.94
   5  -6  10   64.61   21.42
   4   6  10   17.71    5.96
   4   5  10   43.19    6.92
  -4  -4 -10   29.08    4.47
   4   4  10   29.76    5.42
   4   3  10   69.06    7.53
  -4  -3 -10   90.35    6.30
   4   2  10   94.70    7.82
   4   1  10  127.14    8.74
   4   0  10   49.95    3.85
   4   0  10   58.24    4.58
   4  -1  10  112.61    7.24
   4  -1  10  102.96    7.04
   4  -2  10   94.80    7.03
   4  -2  10  109.60    8.60
   4  -3  10  112.80    8.61
   4  -3  10  121.01   11.07
   4  -4  10   45.78    9.91
   4  -4  10   34.70    5.19
   4  -5  10  108.52   17.09
   4  -6  10   33.28   25.38
   3   6  10   28.15    6.01
   3   5  10    4.66    4.54
   3   4  10  111.38    8.94
  -3  -4 -10  100.09    7.54
   3   3  10   83.68    7.91
  -3  -3 -10  100.93    6.85
   3   2  10  182.03   12.06
   3   1  10   27.07    3.76
   3   0  10  282.20   14.92
   3   0  10  325.15   18.06
   3  -1  10   19.60    2.95
   3  -1  10   25.60    3.45
   3  -2  10  191.57   12.14
   3  -3  10  107.15    8.19
   3  -4  10  121.42    9.92
   3  -5  10  -11.58   15.38
   3  -6  10  147.78   42.85
   2   6  10   11.35    5.17
   2   5  10    6.96    4.44
  -2  -5 -10   -0.58    3.27
   2   4  10    9.85    4.05
  -2  -4 -10    8.93    3.01
  -2  -3 -10   35.86    4.35
   2   3  10   47.68    5.62
  -2  -2 -10  124.40    8.25
   2   2  10  133.20    9.09
   2   1  10   85.85    6.22
   2   0  10  331.97   19.37
   2   0  10  325.90   16.17
   2  -1  10   74.76    5.49
   2  -2  10  130.36    8.91
   2  -3  10   39.30    5.55
   2  -4  10   10.92    4.37
   2  -5  10    2.96    4.99
  -1  -5 -10   82.41    6.75
   1   5  10   59.45    7.15
  -1  -4 -10   32.98    4.36
   1   4  10   28.11    4.46
   1   3  10   29.15    4.13
   1   2  10  148.91    9.64
  -1  -2 -10  134.85    8.99
   1   1  10  195.20   12.00
   1   0  10  367.57   21.53
   1  -1  10  157.82    9.98
   1  -2  10  141.36    9.71
   1  -3  10   55.48    6.14
   1  -4  10   37.95    5.43
   1  -5  10   89.02    9.14
   0  -6 -10   12.83    4.57
   0   5  10   28.57    4.84
   0  -5 -10   34.00    4.96
   0   4  10   44.36    5.40
   0  -4 -10   32.19    4.35
   0   3  10   88.37    6.59
   0  -3 -10   60.46    5.78
   0  -2 -10   78.09    5.93
   0   2  10   87.92    6.52
   0  -1 -10  687.51   37.06
   0   1  10  638.11   38.35
   0   0  10   88.72    6.02
   0  -1  10  700.91   40.73
   0  -2  10   84.72    7.01
   0  -3  10   64.48    6.91
   0  -4  10   36.49    5.27
   0  -5  10   32.28    6.06
   0  -6  10   14.86    7.10
   1  -6 -10   37.61    5.56
  -1   5  10   57.53    6.40
   1  -5 -10   56.78    5.94
   1  -4 -10   64.08    6.08
  -1   4  10   86.84    6.74
  -1   3  10   70.41    6.05
   1  -3 -10   64.06    5.64
  -1   2  10  270.35   17.37
   1  -2 -10  306.07   16.87
   1  -1 -10  368.11   19.76
  -1   1  10  323.14   20.27
  -1   0  10  123.95    7.91
  -1  -1  10  384.88   22.92
  -1  -2  10  337.58   20.81
  -1  -3  10   58.01    6.57
  -1  -4  10   63.31    7.28
  -1  -5  10   58.83    8.12
  -1  -6  10   38.63    8.42
   2  -7 -10    0.30    5.86
   2  -6 -10    4.81    4.44
   2  -5 -10   22.18    4.05
  -2   4  10   16.17    3.45
   2  -4 -10   24.20    3.52
   2  -3 -10   21.54    2.93
  -2   3  10   12.90    2.89
  -2   2  10  443.81   23.80
   2  -2 -10  359.65   22.98
  -2   1  10  719.89   40.69
   2  -1 -10  689.17   39.36
  -2   0  10  622.32   36.09
  -2  -1  10  761.57   44.43
  -2  -2  10  382.26   23.44
  -2  -3  10   23.86    4.38
  -2  -4  10   26.23    5.13
  -2  -5  10   19.22    5.89
  -2  -6  10    7.91    7.53
   3  -7 -10    3.45    5.83
   3  -6 -10    7.28    4.64
   3  -5 -10   36.10    5.45
   3  -4 -10   68.54    5.63
  -3   4  10   46.52    5.45
   3  -3 -10   14.62    2.79
  -3   3  10   18.12    2.84
  -3   2  10  281.00   15.51
   3  -2 -10  231.58   15.09
  -3   1  10  124.96    7.78
   3  -1 -10  121.12    7.82
   3  -1 -10  119.91    6.15
   3   0 -10  581.11   32.50
  -3   0  10  583.75   33.91
  -3  -1  10  133.05    9.37
  -3  -2  10  255.40   16.50
  -3  -3  10   15.89    4.16
  -3  -4  10   62.66    7.57
  -3  -5  10   37.11    6.95
  -3  -6  10    8.96    8.16
  -3  -7  10   -5.01   12.66
   4  -6 -10   11.83    5.19
   4  -5 -10   11.39    4.15
   4  -4 -10  110.59    8.13
  -4   3  10  153.20    9.81
   4  -3 -10  150.00    9.86
   4  -2 -10  324.21   14.68
  -4   2  10  290.13   18.16
   4  -2 -10  303.93   17.89
   4  -1 -10   85.67    4.58
   4  -1 -10   85.32    5.89
  -4   1  10   81.06    5.78
   4   0 -10  287.90   16.64
  -4   0  10  306.81   17.55
   4   0 -10  280.16   14.10
  -4  -1  10   95.61    7.83
  -4  -2  10  326.34   20.58
  -4  -3  10  142.19   10.91
  -4  -4  10   95.45    9.27
  -4  -5  10   14.86    6.68
  -4  -6  10   17.67    9.04
   5  -6 -10   15.40    5.54
   5  -5 -10   46.11    6.19
   5  -4 -10   25.36    4.04
  -5   3  10  224.61   13.34
   5  -3 -10  211.58   13.41
   5  -2 -10   76.33    5.92
   5  -2 -10   83.01    4.44
   5  -1 -10  242.48   14.82
   5  -1 -10  250.76   12.28
  -5   1  10  263.03   15.05
   5   0 -10   35.20    3.40
  -5   0  10   39.60    4.27
   5   0 -10   35.33    2.98
  -5  -1  10  244.13   15.74
  -5  -2  10   75.32    7.58
  -5  -3  10  205.02   14.35
  -5  -4  10   28.48    5.95
  -5  -5  10   43.12    8.18
  -5  -6  10    5.05    9.54
   6  -6 -10    1.92    5.24
   6  -5 -10   44.30    6.29
   6  -4 -10   15.69    3.76
   6  -3 -10    7.62    2.76
   6  -2 -10   99.57    5.17
   6  -2 -10   88.26    6.64
  -6   1  10  743.27   41.39
   6  -1 -10  698.40   40.12
   6  -1 -10  708.71   33.93
  -6   0  10   28.72    3.28
   6   0 -10   22.94    2.73
   6   0 -10   20.04    2.87
   6   1 -10  717.29   34.36
  -6  -1  10  725.94   42.55
  -6  -2  10   95.67    8.40
  -6  -3  10    9.54    4.54
  -6  -4  10   12.56    5.59
  -6  -5  10   43.09    8.74
  -6  -6  10   -1.25    9.84
   7  -6 -10   20.20    6.11
   7  -5 -10    7.77    4.48
   7  -4 -10   34.73    4.75
   7  -3 -10    8.42    1.90
   7  -3 -10    4.35    2.82
   7  -2 -10  308.87   18.15
   7  -2 -10  308.48   14.95
   7  -1 -10  166.05    8.84
  -7   1  10  194.93   10.79
   7  -1 -10  162.76   10.65
  -7   0  10  272.59   16.92
   7   0 -10  282.18   13.54
   7   0 -10  269.16   15.79
  -7  -1  10  160.92   12.27
   7   1 -10  195.94    9.45
  -7  -2  10  304.17   19.56
  -7  -3  10    9.73    4.68
  -7  -4  10   38.36    7.13
  -7  -5  10    1.72    7.52
  -7  -6  10   12.79   10.99
   8  -6 -10    8.57    5.82
   8  -5 -10   14.33    4.91
   8  -4 -10  271.07   16.98
   8  -3 -10  148.83    7.86
   8  -3 -10  145.79   10.09
   8  -2 -10  429.32   25.12
   8  -2 -10  444.67   21.00
   8  -1 -10    3.08    1.60
   8  -1 -10    3.43    1.85
  -8   0  10  103.97    8.03
   8   0 -10  106.88    5.99
   8   0 -10  107.37    6.91
  -8  -1  10    3.91    3.45
   8   1 -10    9.52    2.03
   8   2 -10  382.35   19.93
  -8  -2  10  435.80   25.48
  -8  -3  10  131.10   11.14
  -8  -4  10  253.32   18.51
  -8  -5  10   16.52    8.27
  -8  -6  10   -0.59   10.72
   9  -6 -10    9.99    6.02
   9  -5 -10   16.63    5.19
   9  -4 -10  120.18    9.44
   9  -3 -10    8.92    3.27
   9  -3 -10    7.62    2.34
   9  -2 -10   72.00    4.64
   9  -2 -10   68.65    5.93
   9  -1 -10   52.64    4.63
   9  -1 -10   53.44    3.80
   9   0 -10   37.96    3.43
  -9   0  10   32.33    5.00
   9   0 -10   37.38    3.69
   9   1 -10   47.70    3.78
   9   1 -10   46.86    4.04
  -9  -1  10   55.42    6.28
  -9  -2  10   65.68    7.97
   9   2 -10   79.02    5.29
  -9  -3  10    3.45    5.12
  -9  -4  10  113.14   11.79
  -9  -5  10   12.19    8.38
  -9  -6  10   11.98   10.83
  10  -5 -10    2.20    4.83
  10  -4 -10   20.37    4.70
  10  -3 -10   12.19    2.64
  10  -3 -10   11.11    3.56
  10  -2 -10  130.86    7.43
  10  -2 -10  139.61    9.08
  10  -1 -10  387.43   19.18
  10  -1 -10  403.80   22.70
  10   0 -10  427.38   20.51
 -10   0  10  412.72   25.29
  10   0 -10  424.34   23.87
 -10  -1  10  407.21   25.56
  10   1 -10  424.42   20.38
 -10  -2  10  134.76   10.32
  10   2 -10  105.65    7.03
 -10  -3  10    9.02    5.61
 -10  -4  10   11.20    6.88
 -10  -5  10    1.10    8.04
  11  -5 -10   66.53    8.22
  11  -4 -10   24.32    3.94
  11  -4 -10   23.72    5.04
  11  -3 -10   93.19    6.12
  11  -3 -10   86.48    7.71
  11  -2 -10   97.24    7.34
  11  -2 -10   94.92    5.91
  11  -1 -10  127.13    8.43
  11  -1 -10  127.93    7.13
 -11   0  10   11.17    3.39
  11   0 -10   15.24    2.44
  11   0 -10   15.55    2.27
  11   1 -10  153.08    7.84
 -11  -1  10  115.86   10.45
  11   2 -10  103.55    6.51
 -11  -2  10   95.64    9.62
 -11  -3  10   80.13    9.43
 -11  -4  10   17.75    7.23
 -11  -5  10   61.21   10.32
  12  -5 -10   24.44    6.12
  12  -4 -10   20.41    4.20
  12  -4 -10   18.37    5.01
  12  -3 -10  148.93    8.71
  12  -3 -10  151.31   10.75
  12  -2 -10  123.92    7.53
  12  -2 -10  134.75    9.09
  12  -1 -10  197.89   10.64
  12  -1 -10  212.38   12.56
  12   0 -10  125.94    7.27
 -12  -1  10  214.39   14.24
  12   1 -10  194.47   10.78
 -12  -2  10  124.47   11.51
  12   2 -10  151.33    8.28
 -12  -3  10  131.42   11.83
  12   3 -10  126.35    7.98
 -12  -4  10   12.66    7.03
 -12  -5  10   17.44    8.60
  13  -5 -10    2.86    5.66
  13  -4 -10   36.21    4.88
  13  -4 -10   33.88    5.89
  13  -3 -10   11.74    3.53
  13  -3 -10    8.68    4.07
  13  -2 -10  104.08    8.15
  13  -2 -10  108.66    6.76
  13  -1 -10   38.39    4.38
  13  -1 -10   33.06    3.93
  13   0 -10   39.77    4.16
  13   1 -10   33.97    4.15
 -13  -1  10   36.19    5.79
 -13  -2  10   98.74   10.13
  13   2 -10   95.07    6.56
 -13  -3  10    9.68    6.19
  13   3 -10    4.69    3.33
 -13  -4  10   16.68    7.30
 -13  -5  10    1.93    7.92
  14  -4 -10   29.14    5.96
  14  -4 -10   33.38    5.13
  14  -3 -10   -1.30    3.58
  14  -3 -10    0.12    3.97
  14  -2 -10   70.03    6.46
  14  -2 -10   61.94    5.53
  14  -1 -10   17.42    3.14
  14   0 -10  839.38   40.22
  14   1 -10   13.59    3.12
 -14  -2  10   57.90    8.10
  14   2 -10   73.86    5.70
  14   3 -10    2.96    3.56
 -14  -3  10   -1.49    5.88
 -14  -4  10   22.49    7.46
  15  -4 -10    1.53    4.76
  15  -4 -10   -2.72    5.15
  15  -3 -10   23.39    5.13
  15  -3 -10   19.42    4.48
  15  -2 -10    2.23    3.49
  15  -1 -10   35.02    4.02
  15   0 -10    8.10    3.12
  15   1 -10   35.33    4.07
  15   2 -10    4.05    3.57
 -15  -2  10    0.84    6.01
  15   3 -10   15.00    4.21
 -15  -3  10   17.72    7.08
 -15  -4  10    0.74    6.82
  16  -4 -10    0.63    5.55
  16  -4 -10   -1.85    5.12
  16  -3 -10  145.95    9.88
  16  -3 -10  152.06   11.44
  16  -2 -10   69.96    6.22
  16  -1 -10   91.04    6.64
  16   0 -10   10.28    3.51
  16   1 -10  104.94    7.19
  16   2 -10   55.41    5.81
 -16  -3  10  125.89   12.37
  16   3 -10  124.95    8.72
 -16  -4  10    3.82    7.08
  17  -4 -10   20.32    6.62
  17  -3 -10   47.88    6.08
  17  -2 -10   16.63    4.44
  17  -1 -10    7.16    3.85
  17   0 -10    3.96    3.60
  17   1 -10    8.31    3.84
  17   2 -10   25.72    4.71
  17   3 -10   31.83    5.48
 -17  -4  10   10.32    7.28
  18  -3 -10   15.50    5.59
  18  -2 -10   18.14    4.93
  18  -1 -10   13.16    4.41
  18   0 -10   52.13    5.86
  18   1 -10   16.65    4.44
  18   2 -10   10.77    4.72
  19  -1 -10    9.87    4.74
  19   0 -10    7.51    4.53
  19   1 -10    7.00    4.55
  14   1  11    9.91    7.95
  13   2  11   37.48    8.53
  13   1  11   36.81    8.19
  13  -3  11    0.69    7.00
  12   3  11   14.40    7.69
  12   2  11   24.53    7.56
  12   1  11   60.77    9.38
  12   0  11  112.13   11.30
  12  -2  11   26.47    5.41
  12  -3  11   18.61    7.27
  11   3  11   55.05    8.81
  11   2  11   50.22    7.97
  11   1  11    7.85    5.89
  11   0  11  113.50   10.67
  11  -1  11    6.71    5.67
  11  -2  11   28.35    5.25
  11  -3  11   54.40    7.94
  11  -4  11   -0.30    8.53
  10   4  11   11.99    7.38
  10   3  11   43.62    7.72
  10   2  11    4.86    5.88
  10   1  11  227.41   15.97
  10   0  11   19.93    5.38
  10  -1  11  215.56   14.90
  10  -2  11    3.40    4.46
  10  -3  11   45.26    7.30
  10  -4  11   -0.10    8.11
   9   4  11   -0.63    6.39
   9   3  11   22.64    6.70
   9   2  11   32.40    6.25
   9   1  11   61.81    7.76
   9   0  11   55.89    7.05
   9  -1  11   62.32    6.69
   9  -1  11   57.71    5.73
   9  -2  11   42.92    5.58
   9  -2  11   58.01    6.53
   9  -3  11   23.21    6.42
   9  -4  11    1.39    7.92
   8   5  11   -4.65    6.55
   8   4  11   38.58    7.41
   8   3  11   -2.55    5.29
   8   2  11  100.69    9.40
   8   1  11   42.85    5.73
   8   0  11   61.81    6.64
   8  -1  11   32.82    3.93
   8  -1  11   44.22    5.36
   8  -2  11  140.68    9.56
   8  -2  11  138.56    9.87
   8  -3  11    6.08    5.66
   8  -4  11   48.71    9.47
   8  -5  11   -6.15   11.11
   7   5  11   15.46    6.89
   7   4  11   33.60    6.88
   7   3  11   12.40    5.30
   7   2  11   46.09    6.97
   7   1  11    4.27    3.84
   7   0  11    7.13    3.31
   7  -1  11    0.98    2.64
   7  -1  11    3.40    2.91
   7  -2  11   59.26    6.71
   7  -2  11   63.98    5.83
   7  -3  11    8.86    5.88
   7  -3  11   13.05    3.98
   7  -4  11   55.01   10.09
   7  -5  11   36.73   12.83
   6   5  11   13.32    6.17
   6   4  11   27.10    6.33
   6   3  11   38.48    5.99
   6   2  11   37.35    5.38
   6   1  11  157.09   10.97
   6   0  11  239.57   14.91
   6  -1  11  156.22    9.88
   6  -1  11  144.37    8.79
   6  -2  11   40.68    4.55
   6  -2  11   40.81    5.22
   6  -3  11   60.79    7.78
   6  -3  11   52.72    5.96
   6  -4  11   56.42    9.93
   6  -5  11   25.98   12.82
   5   6  11   11.38    6.35
   5   5  11   47.91    7.18
   5   4  11   -0.87    4.97
   5   3  11   18.48    4.91
   5   2  11    2.96    3.75
   5   1  11  172.64   11.48
   5   0  11   60.63    5.31
   5  -1  11  126.83    7.93
   5  -1  11  128.19    8.48
   5  -2  11    1.57    2.58
   5  -2  11   -1.75    3.60
   5  -3  11   41.72    5.33
   5  -3  11   48.37    7.73
   5  -4  11    4.52    4.39
   5  -4  11   -0.63    8.77
   5  -5  11   88.13   16.37
   4   6  11   13.26    6.07
   4   5  11   11.69    5.43
   4   4  11   22.64    5.52
  -4  -4 -11   27.13    3.97
   4   3  11  158.70   10.72
  -4  -3 -11  123.28    9.05
   4   2  11   31.84    4.55
   4   1  11  323.91   19.64
   4   0  11  118.68    6.85
   4   0  11  129.93    8.26
   4  -1  11  318.48   18.70
   4  -1  11  309.11   16.27
   4  -2  11   46.53    5.82
   4  -2  11   38.64    4.46
   4  -3  11  183.75   13.40
   4  -3  11  148.54   10.85
   4  -4  11   51.00   11.16
   4  -4  11   35.91    5.47
   4  -5  11   11.57   15.66
   3   6  11   12.45    5.79
   3   5  11    1.06    4.97
   3   4  11   54.59    7.14
  -3  -4 -11   60.41    5.59
   3   3  11   40.67    6.09
  -3  -3 -11   35.02    4.44
   3   2  11  103.76    8.29
   3   1  11   43.83    4.56
   3   0  11   -0.17    1.82
   3   0  11    1.43    1.52
   3  -1  11   40.40    3.98
   3  -1  11   42.27    4.98
   3  -2  11  120.33    9.62
   3  -2  11  101.23    7.52
   3  -3  11   38.12    5.19
   3  -4  11   73.38    7.64
   3  -5  11   -3.52   19.34
  -2  -5 -11   10.95    3.74
   2   5  11   18.39    5.17
  -2  -4 -11   86.69    6.78
   2   4  11   83.48    8.01
   2   3  11   40.13    5.82
  -2  -3 -11   36.62    4.42
  -2  -2 -11  697.82   40.06
   2   2  11  731.83   41.92
   2   1  11   65.18    5.34
   2   0  11  490.29   27.69
   2   0  11  457.58   22.92
   2  -1  11   68.66    5.31
   2  -2  11  725.46   42.35
   2  -3  11   45.25    5.61
   2  -4  11  104.18    9.14
   2  -5  11   10.51    5.42
   1   5  11   24.72    4.95
  -1  -5 -11   18.67    4.10
   1   4  11   20.26    4.40
  -1  -4 -11   17.67    3.42
  -1  -3 -11   55.19    5.40
   1   3  11   69.46    6.51
  -1  -2 -11  106.61    8.05
   1   2  11  142.74    8.97
   1   1  11   24.12    3.51
   1   0  11  187.16   11.45
   1  -1  11   29.48    3.67
   1  -2  11  113.14    8.23
   1  -3  11   64.25    6.66
   1  -4  11   20.90    4.92
   1  -5  11   20.97    5.80
   0  -6 -11   11.06    4.57
   0   5  11   65.52    6.93
   0  -5 -11   52.80    6.28
   0  -4 -11    8.24    3.11
   0   4  11   11.74    3.98
   0   3  11  140.28    9.80
   0  -3 -11  133.43    9.11
   0   2  11   82.21    7.10
   0  -2 -11  102.11    6.66
   0  -1 -11  810.39   43.44
   0   1  11  745.71   44.95
   0   0  11   50.90    4.20
   0  -1  11  814.01   47.23
   0  -2  11  119.70    8.85
   0  -3  11  150.12   11.11
   0  -4  11    4.33    4.31
   0  -5  11   47.01    6.83
   0  -6  11   13.27    7.05
   1  -6 -11    3.62    4.44
   1  -5 -11    6.01    3.60
   1  -4 -11   74.29    6.30
  -1   4  11   70.49    6.79
   1  -3 -11   78.49    6.40
  -1   3  11   83.62    6.98
  -1   2  11   16.72    2.89
   1  -2 -11   16.13    2.62
  -1   1  11  109.01    7.37
   1  -1 -11  115.07    7.29
  -1   0  11  169.68   10.52
  -1  -1  11  111.58    7.86
  -1  -2  11   20.42    3.86
  -1  -3  11   87.72    8.23
  -1  -4  11   76.95    7.88
  -1  -5  11    9.35    5.44
  -1  -6  11    8.23    7.13
   2  -6 -11   15.36    4.91
   2  -5 -11   25.57    4.43
  -2   4  11  112.65    8.14
   2  -4 -11   95.65    7.71
  -2   3  11  222.24   14.03
   2  -3 -11  218.61   13.56
   2  -2 -11  351.96   19.90
  -2   2  11  332.98   20.45
  -2   1  11  345.02   20.23
   2  -1 -11  340.79   19.71
  -2   0  11  880.02   50.79
  -2  -1  11  360.61   21.77
  -2  -2  11  379.14   23.42
  -2  -3  11  220.21   14.90
  -2  -4  11   91.75    8.88
  -2  -5  11   27.91    6.35
  -2  -6  11    8.75    7.59
   3  -6 -11   18.86    5.19
   3  -5 -11    6.47    3.66
   3  -4 -11   19.59    3.63
  -3   4  11   17.35    3.51
  -3   3  11   49.67    5.07
   3  -3 -11   41.33    4.90
  -3   2  11   10.96    2.44
  -3   1  11   38.08    3.58
   3  -1 -11   29.04    3.61
  -3   0  11   14.89    2.39
   3   0 -11   12.64    1.96
  -3  -1  11   35.73    4.97
  -3  -2  11   33.63    4.74
  -3  -3  11   39.72    5.44
  -3  -4  11   17.91    5.06
  -3  -5  11    0.80    5.75
  -3  -6  11   12.08    8.30
   4  -6 -11    3.81    4.80
   4  -5 -11   24.34    4.55
   4  -4 -11  137.04    9.52
  -4   3  11   16.54    2.91
   4  -2 -11  327.04   18.24
  -4   2  11  292.92   18.44
   4  -1 -11   48.29    4.29
   4  -1 -11   45.48    3.00
  -4   1  11   39.64    3.94
  -4   0  11  735.73   42.11
   4   0 -11  712.72   40.34
  -4  -1  11   56.59    6.04
  -4  -2  11  341.23   21.56
  -4  -3  11    6.40    4.15
  -4  -4  11  122.98   10.65
  -4  -5  11   24.78    6.92
  -4  -6  11    6.55    8.29
   5  -6 -11   16.39    5.54
   5  -5 -11   66.29    7.15
   5  -4 -11    5.63    3.25
   5  -3 -11   94.34    7.18
   5  -2 -11   12.46    1.53
  -5   2  11    7.71    2.11
   5  -2 -11    7.92    2.37
   5  -1 -11  109.08    7.56
   5  -1 -11  115.01    5.99
  -5   1  11  114.80    7.50
   5   0 -11   40.74    3.28
  -5   0  11   50.07    4.70
   5   0 -11   44.38    3.83
  -5  -1  11  117.99    9.21
  -5  -2  11   10.98    3.95
  -5  -3  11   91.67    8.84
  -5  -4  11    3.96    5.04
  -5  -5  11   72.93   10.25
  -5  -6  11   13.41    9.62
   6  -6 -11   -0.50    5.22
   6  -5 -11   27.46    5.25
   6  -4 -11   34.95    4.67
   6  -3 -11  693.48   39.33
  -6   2  11   34.71    3.92
   6  -2 -11   49.30    3.24
   6  -2 -11   46.07    4.70
  -6   1  11 1036.90   58.40
   6  -1 -11 1040.67   47.88
   6  -1 -11  966.71   56.48
   6   0 -11   15.66    1.94
  -6   0  11   17.98    2.97
   6   0 -11   15.18    2.17
  -6  -1  11 1007.99   58.90
  -6  -2  11   47.05    6.84
  -6  -3  11  651.49   39.39
  -6  -4  11   38.03    6.80
  -6  -5  11   28.82    8.04
  -6  -6  11   -6.65    9.67
   7  -6 -11   25.65    6.41
   7  -5 -11   28.32    5.36
   7  -4 -11  126.94    9.40
   7  -3 -11  143.39    9.78
   7  -2 -11   29.15    2.88
   7  -2 -11   26.13    4.05
   7  -1 -11    5.45    1.58
   7  -1 -11    4.55    2.00
  -7   1  11    2.70    1.83
   7   0 -11   26.94    3.44
   7   0 -11   30.05    3.18
  -7   0  11   33.95    3.84
   7   1 -11    2.74    1.73
  -7  -1  11    9.06    3.67
  -7  -2  11   26.97    4.99
  -7  -3  11  142.70   11.62
  -7  -4  11  116.41   11.31
  -7  -5  11   33.73    8.85
  -7  -6  11   20.57   10.94
   8  -6 -11   18.09    6.24
   8  -5 -11   10.04    4.80
   8  -4 -11   15.19    4.24
   8  -3 -11   76.00    6.71
   8  -2 -11  130.35    8.87
   8  -2 -11  132.65    7.06
  -8   1  11  272.93   16.96
   8  -1 -11  295.27   14.03
   8  -1 -11  285.57   16.68
  -8   0  11  726.15   42.44
   8   0 -11  740.60   34.56
   8   0 -11  709.00   40.45
   8   1 -11  269.65   13.86
  -8  -1  11  282.72   17.79
  -8  -2  11  128.59   10.55
  -8  -3  11   73.07    8.73
  -8  -4  11   14.91    6.64
  -8  -5  11   10.65    8.11
  -8  -6  11   16.70   11.15
   9  -6 -11   19.41    6.44
   9  -5 -11    4.46    4.85
   9  -4 -11   16.81    4.43
   9  -3 -11   77.96    5.23
   9  -3 -11   80.90    6.89
   9  -2 -11   99.62    5.85
   9  -2 -11  104.60    7.52
   9  -1 -11    1.26    1.99
   9  -1 -11   -1.50    1.70
   9   0 -11    1.25    1.84
  -9   0  11    1.61    2.84
   9   0 -11    3.27    1.76
   9   1 -11   -1.37    1.94
  -9  -1  11    0.74    3.64
  -9  -2  11   99.11    8.94
   9   2 -11   82.03    5.83
  -9  -3  11   70.34    8.66
  -9  -4  11   14.13    6.82
  -9  -5  11   -0.68    8.07
  -9  -6  11   26.44   11.60
  10  -5 -11   13.75    5.34
  10  -4 -11   53.90    6.63
  10  -3 -11  119.01    7.04
  10  -3 -11  123.54    9.07
  10  -2 -11  218.27   11.42
  10  -2 -11  234.84   14.02
  10  -1 -11  363.90   17.91
  10  -1 -11  368.88   21.12
  10   0 -11  223.39   11.27
 -10   0  11  208.50   14.12
  10   0 -11  225.39   13.01
 -10  -1  11  359.31   23.46
  10   1 -11  395.51   18.72
  10   2 -11  250.46   12.56
 -10  -2  11  229.38   16.52
 -10  -3  11  106.64   10.46
 -10  -4  11   46.74    8.53
 -10  -5  11   14.52    8.55
  11  -5 -11   10.10    5.44
  11  -4 -11   13.19    4.65
  11  -3 -11   33.33    4.72
  11  -3 -11   32.43    4.25
  11  -2 -11   80.54    5.38
  11  -2 -11   80.31    6.66
  11  -1 -11   25.32    2.78
  11  -1 -11   21.51    3.02
  11   0 -11    9.66    2.14
 -11   0  11   10.09    3.34
  11   0 -11    7.84    2.31
 -11  -1  11   22.89    4.93
  11   1 -11   28.15    3.14
  11   2 -11   86.92    5.97
 -11  -2  11   78.03    8.89
 -11  -3  11   30.08    6.91
 -11  -4  11   13.21    7.25
 -11  -5  11    2.50    8.29
  12  -5 -11   21.13    6.03
  12  -4 -11   26.40    5.38
  12  -3 -11  301.59   15.23
  12  -3 -11  294.72   18.41
  12  -2 -11   30.00    3.78
  12  -2 -11   33.28    4.88
  12  -1 -11  258.31   13.41
  12  -1 -11  272.54   15.79
  12   0 -11    1.19    2.36
 -12  -1  11  271.05   18.14
  12   1 -11  282.25   14.20
 -12  -2  11   36.60    6.50
  12   2 -11   36.96    4.44
 -12  -3  11  259.26   18.55
 -12  -4  11   20.65    7.81
 -12  -5  11   10.65    8.76
  13  -5 -11   13.69    6.03
  13  -4 -11   40.92    6.22
  13  -3 -11    7.15    3.33
  13  -3 -11    6.25    3.98
  13  -2 -11   12.53    3.51
  13  -2 -11   15.04    3.11
  13  -1 -11   36.22    4.12
  13  -1 -11   41.52    4.57
  13   0 -11   25.94    3.27
  13   1 -11   31.50    4.21
 -13  -1  11   44.52    6.07
 -13  -2  11   13.07    5.91
  13   2 -11    2.04    2.99
  13   3 -11    7.76    3.49
 -13  -3  11    1.62    6.08
 -13  -4  11   37.34    8.38
 -13  -5  11    3.56    8.32
  14  -4 -11   41.39    5.28
  14  -4 -11   46.49    6.64
  14  -3 -11    6.36    3.60
  14  -3 -11    3.37    4.06
  14  -2 -11  200.71   12.68
  14  -2 -11  186.23   10.57
  14  -1 -11   18.82    3.23
  14   0 -11   70.28    5.46
  14   1 -11   11.40    3.16
  14   2 -11  158.09    9.73
 -14  -2  11  182.50   13.92
 -14  -3  11    0.41    6.28
  14   3 -11    2.02    3.53
 -14  -4  11   24.04    8.03
  15  -4 -11   22.72    6.06
  15  -4 -11   24.39    5.16
  15  -3 -11   21.34    4.96
  15  -3 -11   19.76    4.35
  15  -2 -11   73.69    5.88
  15  -1 -11    9.75    3.25
  15   0 -11   13.67    3.35
  15   1 -11   14.41    3.47
  15   2 -11   70.65    6.06
 -15  -3  11   11.72    7.12
  15   3 -11   22.79    4.42
 -15  -4  11   20.96    7.82
  16  -4 -11    9.73    5.15
  16  -4 -11    8.78    5.85
  16  -3 -11   76.97    8.26
  16  -3 -11   78.63    7.13
  16  -2 -11   67.27    6.06
  16  -1 -11   69.38    5.94
  16   0 -11   40.19    4.94
  16   1 -11   53.07    5.43
  16   2 -11   51.77    5.74
 -16  -3  11   64.49    9.54
  16   3 -11   78.19    6.92
 -16  -4  11    0.00    7.42
  17  -3 -11   17.21    5.04
  17  -2 -11   17.84    4.42
  17  -1 -11   21.11    4.17
  17   0 -11   -3.73    3.50
  17   1 -11   18.51    4.12
  17   2 -11   11.84    4.31
  17   3 -11   12.16    4.81
  18  -2 -11   48.54    5.73
  18  -1 -11   34.52    4.93
  18   0 -11   92.54    7.26
  18   1 -11   34.06    4.96
  18   2 -11   43.70    5.61
  19  -1 -11   32.17    5.34
  19   0 -11   -0.30    4.35
  19   1 -11   26.59    4.99
  14   1  12   16.40    8.47
  13   2  12   28.12    8.33
  13   1  12    7.85    7.42
  12   2  12  106.73   11.80
  12   1  12    5.48    6.61
  12   0  12   53.46    8.38
  12  -3  12   16.54    7.32
  11   3  12    1.87    7.18
  11   2  12   28.99    7.24
  11   1  12    0.24    6.05
  11   0  12   -2.66    5.72
  11  -3  12   -0.44    6.55
  10   3  12   95.09   10.71
  10   2  12    1.11    5.96
  10   1  12   93.92    9.65
  10   0  12    2.77    4.99
  10  -1  12  132.92   10.86
  10  -2  12    4.22    4.56
  10  -3  12  113.59   11.07
  10  -4  12   -1.65    8.60
   9   4  12    6.09    7.00
   9   3  12   -3.17    6.13
   9   2  12   16.68    5.90
   9   1  12    6.05    5.10
   9   0  12   72.82    7.87
   9  -1  12   11.04    4.39
   9  -2  12   17.32    4.74
   9  -2  12   20.46    4.78
   9  -3  12    1.33    5.96
   9  -4  12   14.90    8.77
   8   4  12   57.14    8.52
   8   3  12   26.10    6.51
   8   2  12  205.53   14.62
   8   1  12   73.18    7.73
   8   0  12  205.34   13.72
   8  -1  12   64.76    6.50
   8  -2  12  202.30   13.27
   8  -2  12  198.18   12.31
   8  -3  12   28.72    6.70
   8  -4  12   71.59   10.86
   7   5  12   19.37    7.33
   7   4  12    7.29    6.50
   7   3  12   40.10    6.70
   7   2  12    1.62    4.69
   7   1  12   21.93    4.59
   7   0  12   16.61    3.79
   7  -1  12   17.20    3.33
   7  -1  12   21.52    3.72
   7  -2  12    1.67    3.99
   7  -2  12    1.73    3.23
   7  -3  12   51.43    7.62
   7  -3  12   49.36    6.20
   7  -4  12    8.58    8.80
   7  -5  12   51.56   14.65
   6   5  12   10.50    6.78
   6   4  12   40.53    7.26
   6   3  12  107.24    9.84
   6   2  12  234.56   15.74
   6   1  12  166.73   11.57
   6   0  12  200.84   12.83
   6  -1  12  143.70    8.87
   6  -1  12  153.09    9.91
   6  -2  12  225.01   13.25
   6  -2  12  216.69   13.84
   6  -3  12  136.10   11.86
   6  -3  12  122.66    9.42
   6  -4  12   55.31   10.74
   6  -5  12   14.98   14.12
   5   5  12    3.79    6.04
   5   4  12   15.53    5.90
   5   3  12   12.50    5.08
   5   2  12   76.16    7.56
   5   1  12  174.70   11.70
   5   0  12    6.58    2.74
   5  -1  12  158.53    9.42
   5  -1  12  160.02   10.29
   5  -2  12   83.46    7.75
   5  -2  12   77.69    6.33
   5  -3  12   13.60    6.95
   5  -3  12   14.76    3.91
   5  -4  12   16.30    4.91
   5  -4  12   22.64   10.51
   5  -5  12   19.03   15.84
   4   6  12    7.40    6.26
   4   5  12   10.25    5.90
   4   4  12    4.25    5.23
  -4  -4 -12    3.30    3.30
   4   3  12  198.58   13.96
   4   2  12   64.40    6.80
   4   1  12  622.02   36.50
   4   0  12    1.49    2.29
   4  -1  12  555.15   27.58
   4  -1  12  561.71   32.61
   4  -2  12   49.76    5.10
   4  -2  12   57.80    6.50
   4  -3  12  217.87   14.16
   4  -4  12   -2.53   10.35
   4  -4  12    3.70    4.36
   4  -5  12   43.20   18.92
   3   6  12   23.84    6.46
   3   5  12    2.29    5.45
   3   4  12   34.28    6.03
  -3  -4 -12   35.98    4.99
  -3  -3 -12    7.33    3.02
   3   3  12   10.69    4.45
   3   2  12   31.67    4.53
   3   1  12    1.98    2.45
   3   0  12   15.31    2.54
   3  -1  12    2.54    3.03
   3  -1  12    1.08    2.07
   3  -2  12   29.29    4.36
   3  -2  12   41.16    6.07
   3  -3  12   10.53    3.80
   3  -4  12   68.94   14.22
   3  -4  12   39.81    5.75
   3  -5  12  -13.54   21.73
   2   6  12   25.32    6.29
  -2  -5 -12   -0.55    3.54
   2   5  12    4.79    5.02
  -2  -4 -12   83.42    6.87
   2   4  12   86.36    8.42
  -2  -3 -12   42.36    4.81
   2   3  12   54.32    6.73
  -2  -2 -12  143.40    9.16
   2   2  12  139.95   10.17
   2   1  12   25.16    3.99
   2   0  12  679.26   37.90
   2   0  12  625.72   31.26
   2  -1  12   16.64    2.66
   2  -2  12  167.13   11.12
   2  -3  12   51.64    5.86
   2  -4  12   99.31    8.97
   2  -5  12    1.17    5.31
   1   5  12    5.59    4.74
  -1  -5 -12   -1.85    3.39
   1   4  12    7.80    4.46
  -1  -4 -12    8.23    3.19
  -1  -3 -12   34.98    4.46
   1   3  12   32.67    4.87
  -1  -2 -12  156.73   10.19
   1   2  12  164.74   10.98
   1   1  12   49.60    4.67
   1   0  12  165.40   10.38
   1  -1  12   48.74    4.68
   1  -2  12  163.63   10.99
   1  -3  12   45.78    6.25
   1  -4  12   13.52    4.73
   1  -5  12    0.66    5.26
   0  -6 -12    4.70    4.41
   0  -5 -12   24.71    4.36
   0   5  12   22.25    5.11
   0   4  12   13.01    4.30
   0  -4 -12   17.30    3.56
   0   3  12  478.39   28.43
   0  -3 -12  465.02   27.10
   0   2  12  287.78   17.64
   0  -2 -12  285.24   16.91
   0   1  12  312.76   18.69
   0   0  12  578.68   33.66
   0  -1  12  341.16   20.52
   0  -2  12  299.46   18.63
   0  -3  12  529.16   31.98
   0  -4  12   19.61    5.13
   0  -5  12   27.02    6.13
   0  -6  12    3.86    7.00
   1  -6 -12   10.74    4.84
   1  -5 -12   21.60    4.44
  -1   4  12   12.68    4.02
   1  -4 -12   10.33    3.33
   1  -3 -12   55.72    5.39
  -1   3  12   67.43    6.58
   1  -2 -12    8.14    2.48
  -1   2  12   13.94    2.95
   1  -1 -12  204.91   11.90
  -1   1  12  189.57   12.16
  -1   0  12   57.79    4.76
  -1  -1  12  224.49   14.09
  -1  -2  12   14.74    3.70
  -1  -3  12   72.26    7.53
  -1  -4  12   17.47    5.02
  -1  -5  12   19.28    6.06
  -1  -6  12   17.35    7.59
   2  -6 -12    9.45    4.80
   2  -5 -12   29.12    4.71
   2  -4 -12   44.78    5.35
  -2   4  12   45.84    5.79
  -2   3  12  150.30   10.24
   2  -3 -12  141.20    9.63
  -2   2  12  270.58   17.43
   2  -2 -12  303.08   17.03
   2  -1 -12  349.34   19.92
  -2   1  12  340.83   20.42
  -2   0  12    5.23    2.01
  -2  -1  12  367.76   22.23
  -2  -2  12  332.64   20.85
  -2  -3  12  153.38   11.57
  -2  -4  12   46.08    7.27
  -2  -5  12   39.03    6.96
  -2  -6  12   12.01    7.73
   3  -6 -12    7.38    4.90
   3  -5 -12    5.35    3.86
   3  -4 -12  119.23    8.75
   3  -3 -12   11.42    3.02
  -3   3  12   13.54    3.32
  -3   2  12  107.67    7.88
   3  -2 -12  114.66    7.86
  -3   1  12   31.86    3.68
   3  -1 -12   34.62    4.08
  -3   0  12  287.24   17.37
  -3  -1  12   42.19    5.55
  -3  -2  12  124.62    9.92
  -3  -3  12    9.48    4.32
  -3  -4  12  113.26   10.26
  -3  -5  12    3.81    5.98
  -3  -6  12   12.52    8.27
   4  -6 -12    7.78    5.07
   4  -5 -12   15.39    4.36
   4  -4 -12   52.03    5.58
   4  -3 -12   18.94    3.39
  -4   3  12   20.05    3.30
  -4   2  12  441.59   26.01
   4  -2 -12  441.21   25.40
   4  -1 -12  129.34    8.95
  -4   1  12  161.58    9.06
   4  -1 -12  127.60    7.06
  -4   0  12 1610.29   90.25
   4   0 -12 1529.02   86.66
  -4  -1  12  149.87   10.64
  -4  -2  12  477.87   29.24
  -4  -3  12   16.80    4.79
  -4  -4  12   49.23    7.65
  -4  -5  12   14.60    6.73
  -4  -6  12   11.16    8.74
   5  -6 -12    3.73    5.05
   5  -5 -12   22.73    4.85
   5  -4 -12   19.64    3.85
   5  -3 -12   33.41    4.57
  -5   2  12  104.39    7.36
   5  -2 -12  105.67    7.54
  -5   1  12  160.25   10.60
   5  -1 -12  171.35   10.49
   5  -1 -12  175.23    8.58
  -5   0  12    6.79    2.50
   5   0 -12    4.46    1.74
  -5  -1  12  198.73   13.41
  -5  -2  12  115.61    9.89
  -5  -3  12   41.65    6.05
  -5  -4  12   15.72    5.61
  -5  -5  12   26.97    7.52
  -5  -6  12   -3.62    8.78
   6  -6 -12   -0.93    5.23
   6  -5 -12   57.05    6.96
   6  -4 -12   18.42    4.01
   6  -3 -12  206.87   13.02
   6  -2 -12  129.36    8.87
   6  -1 -12  681.29   31.45
  -6   1  12  652.36   38.36
   6  -1 -12  651.20   37.24
   6   0 -12  104.02    6.99
   6   0 -12  108.39    6.03
  -6   0  12  107.35    7.86
  -6  -1  12  684.95   40.67
  -6  -2  12  132.00   10.82
  -6  -3  12  202.31   14.67
  -6  -4  12   19.50    6.12
  -6  -5  12   62.16    9.50
  -6  -6  12   -5.76    9.24
   7  -6 -12   13.53    5.91
   7  -5 -12   50.36    6.98
   7  -4 -12    0.40    3.48
   7  -3 -12   64.66    6.13
   7  -2 -12  168.48    8.42
   7  -2 -12  156.82   10.54
   7  -1 -12  351.98   16.15
   7  -1 -12  330.35   19.21
  -7   1  12  307.69   19.54
  -7   0  12   12.54    3.03
   7   0 -12   12.37    2.17
   7   0 -12   11.36    2.02
  -7  -1  12  350.39   20.35
   7   1 -12  292.62   15.78
  -7  -2  12  163.60   12.47
  -7  -3  12   59.45    8.17
  -7  -4  12   -2.69    5.62
  -7  -5  12   48.30    9.36
  -7  -6  12   12.79   10.30
   8  -6 -12    9.91    6.13
   8  -5 -12   14.56    5.18
   8  -4 -12   90.74    8.12
   8  -3 -12   32.68    4.80
   8  -2 -12  404.40   23.75
   8  -2 -12  414.64   19.80
  -8   1  12  179.06   12.51
   8  -1 -12  220.96   10.47
   8  -1 -12  215.13   12.55
   8   0 -12  486.74   27.91
  -8   0  12  507.76   29.47
   8   0 -12  489.65   23.87
  -8  -1  12  222.96   13.82
   8   1 -12  176.70   10.29
  -8  -2  12  397.44   25.06
  -8  -3  12   30.19    6.20
  -8  -4  12   84.52   10.25
  -8  -5  12   15.62    8.37
  -8  -6  12    5.89   10.61
   9  -5 -12   19.48    5.48
   9  -4 -12   47.65    6.45
   9  -3 -12    6.25    3.42
   9  -2 -12   56.78    5.59
   9  -2 -12   66.15    4.43
   9  -1 -12   33.75    4.21
   9  -1 -12   33.13    3.56
   9   0 -12  257.09   12.86
   9   0 -12  251.24   14.89
  -9   0  12  254.99   16.08
  -9  -1  12   34.67    5.16
   9   1 -12   32.55    3.82
  -9  -2  12   61.23    7.87
  -9  -3  12    2.74    5.39
  -9  -4  12   44.52    8.15
  -9  -5  12   17.73    8.78
  10  -5 -12   28.90    6.02
  10  -4 -12   69.86    7.52
  10  -3 -12   89.45    7.69
  10  -2 -12  174.98   11.33
  10  -2 -12  176.03    9.28
  10  -1 -12   29.35    4.08
  10  -1 -12   28.09    3.39
 -10   0  12  256.67   16.62
  10   0 -12  266.20   15.47
  10   0 -12  269.51   13.39
  10   1 -12   14.28    2.67
 -10  -2  12  170.47   12.27
  10   2 -12  138.98    8.64
 -10  -3  12   81.54    9.64
 -10  -4  12   73.43   10.58
 -10  -5  12   22.15    9.01
  11  -5 -12   26.54    6.19
  11  -4 -12   16.71    4.87
  11  -3 -12   87.18    7.69
  11  -3 -12   86.32    5.96
  11  -2 -12   86.45    6.92
  11  -2 -12   82.45    5.54
  11  -1 -12  393.07   19.38
  11  -1 -12  397.89   22.83
  11   0 -12   71.06    5.03
  11   0 -12   68.55    5.46
  11   1 -12  401.42   19.91
 -11  -1  12  402.39   25.02
 -11  -2  12   85.26    9.03
  11   2 -12   76.53    5.88
 -11  -3  12   83.81    9.98
 -11  -4  12   13.30    7.33
 -11  -5  12   27.06    9.34
  12  -5 -12   44.41    7.12
  12  -4 -12   17.55    5.14
  12  -3 -12   77.60    7.45
  12  -3 -12   76.75    5.83
  12  -2 -12    2.38    2.56
  12  -2 -12    3.73    3.05
  12  -1 -12  296.26   14.96
  12  -1 -12  299.89   17.60
  12   0 -12   38.61    4.09
 -12  -1  12  288.38   17.84
  12   1 -12  251.47   13.82
  12   2 -12    0.05    2.77
 -12  -2  12    0.21    5.14
 -12  -3  12   68.42    9.67
 -12  -4  12   10.23    7.37
 -12  -5  12   32.45    9.77
  13  -5 -12   19.48    6.33
  13  -4 -12   42.02    6.30
  13  -3 -12   67.80    7.14
  13  -3 -12   65.71    5.74
  13  -2 -12   85.10    7.00
  13  -2 -12   70.19    5.60
  13  -1 -12  278.88   16.60
  13  -1 -12  279.70   14.21
  13   0 -12   20.68    3.14
  13   1 -12  330.67   16.78
  13   2 -12   73.07    5.96
 -13  -2  12   75.90    9.45
 -13  -3  12   57.99    8.53
 -13  -4  12   37.09    8.72
 -13  -5  12   12.44    8.98
  14  -4 -12   57.09    7.84
  14  -3 -12   19.75    4.78
  14  -3 -12   13.04    3.80
  14  -2 -12  110.75    7.20
  14  -2 -12  118.66    8.74
  14  -1 -12   34.87    3.82
  14   0 -12   71.45    5.57
  14   1 -12   38.42    4.57
  14   2 -12  117.96    7.64
 -14  -2  12  108.60   11.34
 -14  -3  12    7.50    6.94
  14   3 -12   14.87    3.94
 -14  -4  12   44.05    9.20
  15  -4 -12   32.17    6.42
  15  -3 -12   14.77    4.11
  15  -3 -12   17.30    4.85
  15  -2 -12  102.05    6.95
  15  -1 -12   18.08    3.49
  15   0 -12  239.88   12.78
  15   1 -12   19.03    3.64
  15   2 -12   94.04    6.99
  15   3 -12   28.23    4.53
 -15  -3  12   18.71    7.48
 -15  -4  12   25.87    8.40
  16  -4 -12   19.90    6.22
  16  -3 -12    3.84    4.66
  16  -3 -12    9.66    4.29
  16  -2 -12   19.16    4.01
  16  -1 -12   51.39    5.29
  16   0 -12   30.58    4.18
  16   1 -12   70.30    6.03
  16   2 -12   11.37    4.04
 -16  -3  12   -5.12    7.28
  16   3 -12   11.00    4.40
 -16  -4  12    8.42    8.13
  17  -3 -12   48.13    6.30
  17  -2 -12    9.18    4.15
  17  -1 -12   50.13    5.52
  17   0 -12    0.73    3.63
  17   1 -12   44.95    5.44
  17   2 -12   10.97    4.21
  17   3 -12   42.17    5.70
  18  -2 -12   28.35    5.05
  18  -1 -12   39.99    5.09
  18   0 -12    0.97    3.97
  18   1 -12   26.73    4.67
  18   2 -12   28.97    5.13
  19  -1 -12   39.61    5.46
  19   0 -12   79.44    7.16
  13   1  13    2.30    7.30
  12   2  13   40.04    8.45
  12   1  13   -1.98    6.67
  12   0  13  291.95   20.28
  11   2  13   18.09    7.16
  11   1  13   63.39    9.26
  11   0  13   31.56    6.98
  11  -3  13    2.39    7.02
  10   3  13   33.69    7.96
  10   2  13   23.82    6.78
  10   1  13   83.97    9.31
  10   0  13   44.06    6.73
  10  -1  13   69.54    8.41
  10  -3  13   22.70    7.23
   9   3  13   16.68    6.84
   9   2  13   36.90    6.79
   9   1  13   15.06    5.51
   9   0  13   59.00    7.49
   9  -1  13   23.58    5.15
   9  -2  13   46.76    6.83
   9  -3  13   12.16    6.52
   9  -4  13    3.88    8.94
   8   4  13   31.93    7.86
   8   3  13    2.20    6.06
   8   2  13  104.90    9.90
   8   1  13   83.84    8.32
   8   0  13  252.52   16.39
   8  -1  13  102.52    8.41
   8  -2  13  101.43    8.31
   8  -2  13   92.12    8.39
   8  -3  13    2.53    6.04
   8  -4  13   53.97   10.75
   7   4  13   11.01    6.97
   7   3  13   -0.38    5.52
   7   2  13   51.56    7.33
   7   1  13    1.79    4.14
   7   0  13  105.17    8.31
   7  -1  13    4.77    3.40
   7  -2  13   40.60    5.56
   7  -2  13   40.57    5.46
   7  -3  13   -6.24    6.02
   7  -3  13    1.88    4.17
   7  -4  13   12.57    9.51
   6   5  13   10.31    7.21
   6   4  13    9.84    6.45
   6   3  13   18.78    5.91
   6   2  13  109.83    9.47
   6   1  13   23.31    4.41
   6   0  13  201.73   13.05
   6  -1  13   26.49    3.84
   6  -2  13   69.28    7.58
   6  -2  13   64.57    6.10
   6  -3  13   23.33    7.02
   6  -3  13   21.40    4.51
   6  -4  13   22.21   10.00
   6  -5  13   18.49   14.86
   5   5  13   16.50    7.13
   5   4  13   -2.48    5.68
   5   3  13   25.74    5.85
   5   2  13  110.02    9.30
   5   1  13  209.18   13.69
   5   0  13    2.82    2.77
   5  -1  13  180.94   11.45
   5  -1  13  175.30   10.30
   5  -2  13  106.18    9.07
   5  -3  13   25.34    4.55
   5  -3  13   25.37    7.64
   5  -4  13   -6.85   10.10
   5  -4  13   -1.70    4.60
   5  -5  13   68.59   19.01
   4   5  13   47.19    7.96
   4   4  13   34.34    6.57
  -4  -4 -13   23.69    4.38
   4   3  13   96.28    9.23
   4   2  13   62.85    6.99
   4   1  13  306.07   18.81
   4   0  13    1.42    2.49
   4  -1  13  295.12   17.45
   4  -1  13  280.77   15.26
   4  -2  13   58.69    5.70
   4  -2  13   75.40    8.17
   4  -3  13  159.71   13.40
   4  -3  13  115.26    9.31
   4  -4  13   66.11   13.39
   4  -4  13   37.58    5.93
   4  -5  13  136.11   24.77
   3   6  13   19.30    6.73
   3   5  13    2.02    5.91
   3   4  13   28.86    6.01
  -3  -4 -13   15.33    3.79
  -3  -3 -13   15.87    3.59
   3   3  13   33.25    5.56
   3   2  13   76.11    7.34
   3   1  13  197.44   12.64
   3   0  13   27.75    3.78
   3  -1  13  224.93   12.04
   3  -1  13  200.73   13.08
   3  -2  13   99.37    9.52
   3  -2  13   89.26    7.12
   3  -3  13   20.56    4.33
   3  -3  13   33.94    8.93
   3  -4  13   25.46   13.80
   3  -4  13   17.36    4.89
   3  -5  13   -5.26   25.58
   2   5  13   12.74    5.64
  -2  -5 -13    1.58    3.70
  -2  -4 -13   85.91    7.48
   2   4  13  108.54    9.37
   2   3  13   41.54    6.64
  -2  -3 -13   36.06    4.69
   2   2  13  245.45   15.76
   2   1  13  114.22    8.12
   2   0  13  169.83   10.73
   2  -1  13  115.41    7.96
   2  -2  13  248.85   15.64
   2  -3  13   45.97    5.89
   2  -4  13  104.23    9.38
   2  -5  13    2.50    5.39
  -1  -5 -13   28.36    4.65
   1   5  13   34.29    6.10
   1   4  13   43.46    6.87
  -1  -4 -13   35.87    5.00
   1   3  13   47.99    6.61
  -1  -3 -13   34.94    4.73
  -1  -2 -13  150.04   10.24
   1   2  13  170.46   11.11
   1   1  13  207.74   12.99
   1   0  13  326.37   19.46
   1  -1  13  224.52   13.91
   1  -2  13  172.86   11.69
   1  -3  13   39.51    5.81
   1  -4  13   42.79    6.17
   1  -5  13   30.66    6.47
   0  -6 -13    1.92    4.41
   0  -5 -13   70.83    6.99
   0   5  13   81.34    8.33
   0   4  13   43.65    6.49
   0  -4 -13   30.10    4.33
   0  -3 -13    4.34    2.79
   0   3  13    2.28    3.98
   0   2  13  119.76    8.58
   0  -2 -13  108.48    7.80
   0   1  13  308.14   18.54
   0   0  13  236.31   14.39
   0  -1  13  329.08   19.87
   0  -2  13  114.83    8.74
   0  -3  13    3.47    4.08
   0  -4  13   36.47    5.92
   0  -5  13   77.76    9.25
   0  -6  13    3.56    6.98
   1  -6 -13   28.04    5.52
   1  -5 -13   14.42    4.24
   1  -4 -13    4.24    3.16
  -1   4  13    3.42    4.01
   1  -3 -13  262.25   16.30
  -1   3  13  281.14   17.39
   1  -2 -13   32.49    4.38
  -1   2  13   28.78    4.69
  -1   1  13  524.66   31.98
   1  -1 -13  570.92   31.00
  -1   0  13   16.47    2.58
  -1  -1  13  631.24   37.09
  -1  -2  13   37.39    4.88
  -1  -3  13  308.66   19.83
  -1  -4  13    2.07    4.75
  -1  -5  13   17.53    6.14
  -1  -6  13   18.80    7.73
   2  -6 -13    4.33    4.90
   2  -5 -13   11.47    4.26
   2  -4 -13   49.22    5.60
   2  -3 -13   65.99    6.02
  -2   3  13   65.42    6.72
  -2   2  13   22.24    3.59
   2  -2 -13   35.73    4.36
   2  -1 -13  466.77   27.54
  -2   1  13  502.52   28.45
  -2   0  13  251.89   15.38
  -2  -1  13  504.26   30.00
  -2  -2  13   41.09    6.07
  -2  -3  13   69.97    8.00
  -2  -4  13   57.77    7.72
  -2  -5  13   13.76    6.13
  -2  -6  13    2.04    7.34
   3  -6 -13   28.70    5.89
   3  -5 -13    1.98    3.95
   3  -4 -13   52.77    5.74
   3  -3 -13   43.85    4.87
  -3   3  13   37.06    5.55
  -3   2  13  449.99   24.88
   3  -2 -13  383.25   24.01
  -3   1  13   85.55    6.53
   3  -1 -13   97.84    6.58
  -3   0  13  489.65   28.83
  -3  -1  13  108.53    8.37
  -3  -2  13  444.38   27.30
  -3  -3  13   54.27    7.36
  -3  -4  13   55.61    7.82
  -3  -5  13    3.25    6.05
  -3  -6  13   34.44    8.95
   4  -6 -13   34.40    6.21
   4  -5 -13   33.46    5.27
   4  -4 -13   94.69    7.77
   4  -3 -13   32.68    4.23
  -4   3  13   32.91    5.04
   4  -2 -13  270.04   17.26
  -4   2  13  311.34   17.72
  -4   1  13    2.53    2.03
   4  -1 -13    3.07    2.18
  -4   0  13  327.30   19.78
  -4  -1  13    4.95    3.30
  -4  -2  13  310.43   20.06
  -4  -3  13   31.59    5.68
  -4  -4  13   98.41   10.00
  -4  -5  13   31.32    7.52
  -4  -6  13   30.56    9.43
   5  -6 -13    4.62    5.25
   5  -5 -13   23.06    4.95
   5  -4 -13  104.57    8.30
   5  -3 -13   59.97    5.80
  -5   2  13  272.31   16.61
   5  -2 -13  274.14   16.42
   5  -1 -13  119.83    6.53
  -5   1  13  124.32    8.24
   5  -1 -13  125.67    8.33
  -5   0  13  893.88   50.39
   5   0 -13  840.08   48.26
  -5  -1  13  151.38   11.01
  -5  -2  13  300.66   19.71
  -5  -3  13   63.09    8.28
  -5  -4  13  104.38   10.56
  -5  -5  13   23.81    7.46
  -5  -6  13    2.31    8.79
   6  -6 -13    1.62    5.29
   6  -5 -13   46.26    6.44
   6  -4 -13   10.47    3.84
   6  -3 -13  130.50    9.31
  -6   2  13   39.33    4.60
   6  -2 -13   50.31    5.25
   6  -1 -13   80.03    4.76
   6  -1 -13   77.20    6.05
  -6   1  13   72.60    5.94
   6   0 -13   79.38    5.13
  -6   0  13   91.50    7.05
   6   0 -13   85.93    6.02
  -6  -1  13   80.77    7.95
  -6  -2  13   48.24    7.27
  -6  -3  13  139.77   11.66
  -6  -4  13    6.79    5.82
  -6  -5  13   42.72    8.72
  -6  -6  13    7.22    9.37
   7  -6 -13   14.31    5.90
   7  -5 -13   14.70    4.92
   7  -4 -13    1.38    3.63
   7  -3 -13  136.53    9.59
   7  -2 -13    7.54    2.86
   7  -1 -13  973.47   56.87
   7  -1 -13 1000.76   48.22
  -7   1  13 1084.99   58.83
   7   0 -13   15.31    2.41
  -7   0  13   18.03    3.38
   7   0 -13   16.76    2.26
  -7  -1  13 1052.90   61.65
  -7  -2  13   10.88    4.71
  -7  -3  13  137.12   11.83
  -7  -4  13    3.69    6.08
  -7  -5  13   13.34    7.91
   8  -5 -13   16.33    5.21
   8  -4 -13  141.06   10.33
   8  -3 -13   18.85    3.81
   8  -2 -13    7.07    2.90
   8  -1 -13   40.24    4.55
   8  -1 -13   36.28    3.60
   8   0 -13  111.81    6.59
  -8   0  13  111.52    8.52
   8   0 -13  109.27    7.48
  -8  -1  13   41.99    5.69
   8   1 -13   51.90    4.24
  -8  -2  13    9.63    4.94
  -8  -3  13   13.60    5.73
  -8  -4  13  131.85   12.45
  -8  -5  13    7.77    8.26
   9  -5 -13    5.23    5.05
   9  -4 -13   81.72    7.74
   9  -3 -13   12.47    3.71
   9  -2 -13  453.96   21.71
   9  -2 -13  442.31   25.97
   9  -1 -13   57.74    5.41
   9  -1 -13   61.51    4.53
  -9   0  13  530.20   30.54
   9   0 -13  510.05   24.79
   9   0 -13  495.76   28.92
   9   1 -13   64.77    5.09
  -9  -1  13   65.09    7.58
  -9  -2  13  447.41   28.06
  -9  -3  13   13.61    5.95
  -9  -4  13   78.74   10.67
  -9  -5  13    3.93    8.43
  10  -5 -13   35.88    6.46
  10  -4 -13   53.80    6.94
  10  -3 -13   57.49    6.34
  10  -2 -13  239.38   11.94
  10  -2 -13  228.46   14.47
  10  -1 -13   87.48    6.76
  10  -1 -13   88.75    5.73
  10   0 -13   36.68    3.92
  10   0 -13   37.03    4.21
 -10   0  13   35.55    5.68
  10   1 -13  100.80    6.45
 -10  -1  13   97.47    9.09
 -10  -2  13  229.28   16.21
 -10  -3  13   48.68    7.79
 -10  -4  13   52.25    8.98
 -10  -5  13   31.78    9.56
  11  -5 -13   25.57    6.24
  11  -4 -13   38.14    5.88
  11  -3 -13  115.88    9.09
  11  -2 -13  115.14    6.89
  11  -2 -13  116.16    8.44
  11  -1 -13  185.43    9.81
  11  -1 -13  179.47   11.50
  11   0 -13  476.59   23.29
  11   0 -13  477.76   27.10
  11   1 -13  160.40    9.85
 -11  -1  13  201.86   13.31
  11   2 -13  105.33    6.86
 -11  -2  13  102.12   10.12
 -11  -3  13  103.30   10.94
 -11  -4  13   32.91    8.35
 -11  -5  13   12.09    9.20
  12  -5 -13    9.81    5.86
  12  -4 -13   19.13    5.29
  12  -3 -13   16.25    4.40
  12  -2 -13   22.19    3.13
  12  -2 -13   22.11    3.80
  12  -1 -13   30.44    4.64
  12  -1 -13   32.82    4.07
  12   0 -13   27.19    3.30
  12   1 -13   44.85    4.59
 -12  -1  13   32.23    5.81
 -12  -2  13   15.72    5.89
  12   2 -13   18.02    3.41
 -12  -3  13   12.46    6.75
 -12  -4  13    9.70    7.77
 -12  -5  13   -2.25    8.62
  13  -4 -13   15.06    5.26
  13  -3 -13   90.91    8.29
  13  -2 -13   27.01    4.13
  13  -2 -13   26.39    3.52
  13  -1 -13  160.73    8.99
  13   0 -13  170.18    9.54
  13   1 -13  118.09    7.50
  13   2 -13   44.98    4.97
 -13  -2  13   25.79    6.74
 -13  -3  13   80.77   10.47
 -13  -4  13   13.21    7.91
  14  -4 -13   33.29    6.21
  14  -3 -13   21.89    4.99
  14  -3 -13   29.29    4.11
  14  -2 -13   61.44    5.44
  14  -2 -13   61.78    6.43
  14  -1 -13    2.90    2.89
  14   0 -13   94.38    6.48
  14   1 -13    3.54    3.11
 -14  -2  13   63.21    9.45
  14   2 -13   69.97    5.96
 -14  -3  13   21.23    7.72
 -14  -4  13   22.33    8.53
  15  -4 -13   36.11    6.59
  15  -3 -13    7.68    4.62
  15  -3 -13    7.74    3.88
  15  -2 -13  180.79   10.24
  15  -1 -13   -0.02    3.04
  15   0 -13  204.39   11.25
  15   1 -13    1.89    3.27
  15   2 -13  203.03   11.59
 -15  -3  13    3.77    7.28
 -15  -4  13   22.05    8.66
  16  -4 -13    3.14    5.56
  16  -3 -13   30.25    5.75
  16  -3 -13   36.67    4.87
  16  -2 -13   28.10    4.30
  16  -1 -13    6.07    3.44
  16   0 -13    2.02    3.35
  16   1 -13    2.78    3.44
  16   2 -13   30.11    4.66
 -16  -3  13   25.93    8.44
  16   3 -13   34.57    5.10
 -16  -4  13   -1.46    8.21
  17  -3 -13   48.81    5.76
  17  -2 -13   22.21    4.48
  17  -1 -13  132.93    8.57
  17   0 -13   97.17    7.19
  17   1 -13  163.92    9.95
  17   2 -13   19.60    4.62
  18  -2 -13    5.59    4.38
  18  -1 -13    6.03    4.08
  18   0 -13    2.60    3.86
  18   1 -13    2.96    4.01
  12   1  14    5.20    6.91
  12   0  14   51.86    8.58
  11   2  14   27.26    7.69
  11   1  14   61.72    9.35
  11   0  14   -0.66    6.01
  10   2  14   39.41    7.44
  10   1  14   62.27    8.80
  10   0  14    5.25    5.55
  10  -1  14   62.58    8.43
   9   3  14   10.25    6.94
   9   2  14   27.90    6.73
   9   1  14  200.58   14.40
   9   0  14    6.11    4.90
   9  -1  14  206.23   14.25
   9  -2  14   30.62    5.88
   9  -3  14    7.21    6.67
   8   3  14    6.30    6.33
   8   2  14   28.16    6.37
   8   1  14  171.98   12.56
   8   0  14    2.66    4.33
   8  -1  14  157.47   11.32
   8  -2  14   27.25    5.13
   8  -3  14    3.53    6.34
   8  -4  14   53.23   11.08
   7   4  14   35.28    8.12
   7   3  14    5.91    6.10
   7   2  14  177.07   13.16
   7   1  14    3.04    4.41
   7   0  14  205.08   13.55
   7  -1  14    2.41    3.64
   7  -2  14  149.82   10.67
   7  -3  14    2.84    6.35
   7  -3  14    1.85    4.48
   7  -4  14   43.33   10.98
   6   4  14   20.00    7.26
   6   3  14   52.07    8.19
   6   2  14   79.49    8.28
   6   1  14   -2.20    3.90
   6   0  14    4.44    3.44
   6  -1  14    0.08    3.14
   6  -2  14   74.91    8.02
   6  -2  14   72.00    6.69
   6  -3  14   65.32    8.79
   6  -3  14   50.90    6.37
   6  -4  14   17.26   10.54
   5   5  14   15.19    7.57
   5   4  14   -4.55    6.14
   5   3  14  112.45   10.26
   5   2  14   45.11    6.72
   5   1  14  230.56   14.94
   5   0  14  351.50   21.26
   5  -1  14  227.44   14.23
   5  -2  14   38.88    5.77
   5  -2  14   32.99    4.88
   5  -3  14  112.04   12.01
   5  -3  14   88.31    7.97
   5  -4  14    4.85   10.84
   5  -4  14   -1.60    4.81
   5  -5  14   17.64   18.17
   4   5  14   18.07    7.29
   4   4  14   24.45    6.72
   4   3  14    5.45    5.21
   4   2  14   17.66    4.73
   4   1  14  100.80    7.86
   4   0  14   54.96    5.33
   4  -1  14   91.09    6.84
   4  -2  14   21.77    3.83
   4  -2  14   29.85    5.85
   4  -3  14   14.43    4.22
   4  -3  14   14.91    8.22
   4  -4  14   30.85    5.72
   4  -4  14   64.38   13.83
   4  -5  14   30.97   23.00
   3   5  14   10.47    6.56
  -3  -4 -14   11.79    3.92
   3   4  14   16.67    6.09
   3   3  14  186.84   13.65
   3   2  14  111.20    9.11
   3   1  14  190.16   12.37
   3   0  14  132.77    8.92
   3  -1  14  143.43    8.95
   3  -1  14  134.20    9.23
   3  -2  14  101.90    8.04
   3  -2  14  125.77   10.28
   3  -3  14  196.72   13.20
   3  -4  14   34.24   14.71
   3  -4  14   17.02    5.14
   3  -5  14   13.09   29.18
  -2  -5 -14    0.43    3.82
   2   5  14    6.72    6.19
   2   4  14   31.54    6.49
  -2  -4 -14   30.15    4.56
   2   3  14   12.10    5.07
  -2  -3 -14    9.14    3.40
   2   2  14  124.68    9.58
   2   1  14    3.78    2.82
   2   0  14   36.87    4.18
   2  -1  14   -3.20    3.33
   2  -1  14    2.86    2.54
   2  -2  14   98.29    7.73
   2  -3  14   13.14    4.26
   2  -4  14   35.51    5.79
   2  -5  14   -2.96    5.35
   1   5  14    5.16    5.59
  -1  -5 -14    2.69    3.80
   1   4  14   42.63    6.43
  -1  -4 -14   39.07    5.30
   1   3  14    3.19    4.61
  -1  -3 -14    7.71    3.27
   1   2  14  406.87   24.71
   1   1  14    7.83    2.81
   1   0  14  800.56   46.41
   1  -1  14   12.04    2.86
   1  -3  14    6.51    4.03
   1  -4  14   52.36    7.38
   1  -5  14    1.88    5.58
   0  -6 -14   14.32    5.10
   0  -5 -14   19.48    4.43
   0   5  14   23.19    5.86
   0  -4 -14   25.94    4.19
   0   4  14   26.12    5.55
   0  -3 -14   77.89    6.73
   0   3  14   88.06    8.26
   0  -2 -14   30.35    4.57
   0   2  14   36.72    5.16
   0   1  14    7.05    2.66
   0   0  14  216.27   13.39
   0  -1  14    6.32    2.72
   0  -2  14   26.64    4.30
   0  -3  14   91.41    8.36
   0  -4  14   34.79    6.11
   0  -5  14   16.51    6.04
   0  -6  14   22.79    7.71
   1  -6 -14   14.32    5.14
   1  -5 -14   21.11    4.57
  -1   4  14   10.55    4.70
   1  -4 -14    5.36    3.48
   1  -3 -14   78.66    6.61
   1  -2 -14   40.27    4.56
  -1   2  14   37.11    5.20
  -1   1  14  161.09   10.46
  -1   0  14   91.87    6.74
  -1  -1  14  200.54   13.04
  -1  -2  14   43.24    5.99
  -1  -3  14   83.32    8.29
  -1  -4  14    7.03    4.99
  -1  -5  14   29.36    6.78
  -1  -6  14    5.25    7.38
   2  -6 -14   12.82    5.22
   2  -5 -14    9.52    4.27
  -2   4  14   44.69    6.51
   2  -4 -14   39.01    5.45
  -2   3  14    3.32    3.87
   2  -3 -14    2.23    2.93
   2  -2 -14   31.21    4.58
   2  -1 -14   18.00    2.93
  -2   1  14   12.20    2.69
  -2   0  14   15.38    2.80
  -2  -1  14   23.73    3.73
  -2  -2  14   39.73    6.25
  -2  -3  14   -0.20    4.44
  -2  -4  14   40.71    6.54
  -2  -5  14    6.69    6.08
  -2  -6  14   20.24    8.27
   3  -6 -14   18.54    5.63
   3  -5 -14    9.85    4.42
   3  -4 -14   57.29    6.00
   3  -3 -14   81.26    6.98
  -3   3  14   87.45    7.72
  -3   2  14  353.48   21.97
   3  -2 -14  376.12   21.39
  -3   1  14  465.40   26.58
   3  -1 -14  435.75   25.81
  -3   0  14 1304.82   75.20
  -3  -1  14  480.46   28.89
  -3  -2  14  428.08   26.46
  -3  -3  14   86.07    8.86
  -3  -4  14   64.20    8.36
  -3  -5  14    9.45    6.47
  -3  -6  14   18.32    8.45
   4  -6 -14   22.89    6.05
   4  -5 -14    5.44    4.34
   4  -4 -14   34.75    4.88
  -4   3  14   18.74    3.87
   4  -3 -14   22.02    3.74
   4  -2 -14   72.99    6.14
  -4   2  14   73.57    6.36
  -4   1  14  308.48   18.69
   4  -1 -14  314.10   18.29
  -4   0  14  129.58    9.06
  -4  -1  14  356.07   22.01
  -4  -2  14   88.56    8.68
  -4  -3  14   26.26    5.77
  -4  -4  14   36.93    6.88
  -4  -5  14    1.56    6.54
  -4  -6  14   23.93    9.12
   5  -6 -14    2.21    5.42
   5  -5 -14    7.92    4.55
   5  -4 -14   45.34    5.74
   5  -3 -14   80.25    7.02
  -5   2  14  379.03   21.96
   5  -2 -14  351.88   21.48
   5  -1 -14    9.88    2.65
  -5   0  14  971.63   56.38
  -5  -1  14   13.55    3.98
  -5  -2  14  384.00   24.42
  -5  -3  14   90.67    9.39
  -5  -4  14   54.15    8.73
  -5  -5  14    8.20    6.93
  -5  -6  14    3.18    9.17
   6  -5 -14   15.88    4.94
   6  -4 -14   54.05    6.17
   6  -3 -14   40.08    5.29
  -6   2  14   19.67    3.14
   6  -2 -14   22.52    3.57
  -6   1  14   21.67    2.96
   6  -1 -14   13.60    2.88
   6   0 -14   34.82    3.96
  -6   0  14   38.20    5.01
  -6  -1  14   17.50    4.41
  -6  -2  14   31.10    5.69
  -6  -3  14   50.81    7.18
  -6  -4  14   55.57    8.09
  -6  -5  14    9.28    7.63
   7  -5 -14   37.84    6.05
   7  -4 -14   18.21    4.47
   7  -3 -14  299.74   18.34
   7  -2 -14   20.75    3.59
   7  -1 -14  675.74   38.43
   7  -1 -14  687.62   32.48
  -7   1  14  679.45   39.62
   7   0 -14   16.15    2.33
  -7   0  14   24.08    3.63
   7   0 -14   17.01    2.60
  -7  -1  14  740.55   43.99
  -7  -2  14   24.68    5.55
  -7  -3  14  292.34   19.99
  -7  -4  14   14.56    6.68
  -7  -5  14   28.75    8.55
   8  -5 -14    7.06    4.87
   8  -4 -14   43.33    6.27
   8  -3 -14   26.57    4.33
   8  -2 -14   32.82    4.20
  -8   1  14  203.70   12.31
   8  -1 -14  189.60   12.20
   8  -1 -14  194.43   10.20
   8   0 -14   34.00    4.01
   8   0 -14   36.67    3.83
  -8   0  14   34.06    5.36
  -8  -1  14  203.30   14.26
  -8  -2  14   37.88    6.42
  -8  -3  14   28.52    6.64
  -8  -4  14   41.30    8.17
  -8  -5  14    9.72    8.24
   9  -5 -14   16.69    5.42
   9  -4 -14   57.80    6.92
   9  -3 -14   92.60    7.92
   9  -2 -14  209.39   13.31
   9  -1 -14   94.70    7.20
   9  -1 -14   98.68    6.01
   9   0 -14  460.68   22.34
   9   0 -14  442.17   26.03
  -9   0  14  469.63   27.53
  -9  -1  14  101.74    8.93
   9   1 -14   84.29    6.08
  -9  -2  14  216.20   15.71
  -9  -3  14   91.24   10.30
  -9  -4  14   55.93    8.92
  -9  -5  14    6.46    8.55
  10  -5 -14   23.02    5.88
  10  -4 -14    7.27    4.49
  10  -3 -14   12.26    3.97
  10  -2 -14  118.51    8.79
  10  -1 -14   27.10    3.05
  10  -1 -14   27.22    3.60
  10   0 -14   22.28    3.02
  10   0 -14   22.99    2.99
 -10   0  14   20.60    4.03
  10   1 -14   33.08    3.52
 -10  -1  14   30.82    5.44
 -10  -2  14  132.46   11.60
 -10  -3  14   12.13    6.42
 -10  -4  14   13.13    7.40
 -10  -5  14   13.35    9.06
  11  -5 -14   61.68    8.37
  11  -4 -14   60.06    7.44
  11  -3 -14   90.91    7.77
  11  -2 -14  251.87   15.80
  11  -2 -14  259.89   13.16
  11  -1 -14  311.08   15.52
  11  -1 -14  304.29   18.28
  11   0 -14  138.95    9.03
  11   0 -14  137.31    8.03
 -11  -1  14  317.12   22.13
  11   1 -14  377.64   17.69
 -11  -2  14  241.20   17.16
 -11  -3  14   95.31   10.73
 -11  -4  14   57.81    9.47
 -11  -5  14   57.88   11.14
  12  -4 -14    9.33    4.99
  12  -3 -14   58.47    6.50
  12  -2 -14   16.95    3.75
  12  -2 -14   17.67    3.08
  12  -1 -14    5.31    2.86
  12  -1 -14    5.83    2.66
  12   0 -14    4.17    2.71
  12   1 -14    7.74    2.98
 -12  -1  14    2.59    4.74
  12   2 -14   14.62    3.39
 -12  -2  14   19.61    6.19
 -12  -3  14   60.03    8.83
 -12  -4  14   12.20    7.92
  13  -4 -14    0.60    4.92
  13  -3 -14   39.84    5.53
  13  -2 -14   14.49    3.71
  13  -2 -14    9.63    3.06
  13  -1 -14  450.68   22.20
  13   0 -14   15.31    3.19
  13   1 -14  452.17   22.50
 -13  -2  14    7.96    5.95
  13   2 -14    4.27    3.23
 -13  -3  14   44.91    8.40
 -13  -4  14   -1.45    7.47
  14  -4 -14   18.79    5.79
  14  -3 -14    2.55    4.17
  14  -2 -14   23.03    4.21
  14  -2 -14   19.97    3.65
  14  -1 -14   57.06    5.32
  14   0 -14   51.98    5.09
  14   1 -14   56.85    5.53
  14   2 -14   18.14    3.87
 -14  -2  14   22.60    6.96
 -14  -3  14    6.02    7.07
 -14  -4  14   10.55    8.30
  15  -4 -14   77.83    9.19
  15  -3 -14   10.06    4.64
  15  -2 -14  123.89    7.96
  15  -1 -14   19.79    3.66
  15   0 -14  268.99   14.20
  15   1 -14   24.23    4.01
  15   2 -14  158.49    9.78
 -15  -3  14    6.24    7.49
 -15  -4  14   54.71   10.10
  16  -3 -14   54.29    7.51
  16  -2 -14    6.02    3.67
  16  -1 -14   12.11    3.73
  16   0 -14   22.44    3.94
  16   1 -14   11.94    3.83
  16   2 -14    6.56    3.98
 -16  -3  14   47.91    9.60
  17  -3 -14   11.40    4.63
  17  -2 -14   47.19    5.83
  17  -1 -14   55.00    5.82
  17   0 -14   27.78    4.34
  17   1 -14   57.40    6.00
  17   2 -14   48.50    6.17
  18  -2 -14    5.07    4.36
  18  -1 -14   56.82    6.25
  18   0 -14   45.92    5.75
  18   1 -14   63.46    6.46
  12   0  15    9.05    7.32
  11   1  15   26.50    7.21
  11   0  15  100.17   10.74
  10   2  15   25.12    7.19
  10   1  15   15.55    6.44
  10   0  15    8.26    5.85
  10  -1  15   16.06    6.18
   9   2  15   -0.62    5.94
   9   1  15  130.86   11.17
   9   0  15    1.97    5.04
   9  -1  15  126.77   10.56
   9  -2  15    4.95    5.42
   8   3  15    4.11    6.59
   8   2  15    2.52    5.78
   8   1  15   33.36    6.12
   8   0  15    5.10    4.69
   8  -1  15   29.35    5.37
   8  -2  15    3.96    4.88
   8  -3  15    0.71    6.59
   8  -4  15   -4.88    9.34
   7   3  15   13.68    6.67
   7   2  15  111.19   10.22
   7   1  15   19.22    5.19
   7   0  15  129.34    9.87
   7  -1  15    9.53    4.06
   7  -2  15  123.60    9.62
   7  -3  15   19.00    7.17
   7  -3  15   18.57    5.34
   7  -4  15   21.99   10.79
   6   4  15   11.99    7.33
   6   3  15    6.27    6.01
   6   2  15   24.35    5.70
   6   1  15  107.75    8.96
   6   0  15    5.75    3.76
   6  -1  15   93.88    7.67
   6  -2  15   24.60    4.46
   6  -3  15    7.02    4.57
   6  -3  15    6.01    6.87
   6  -4  15    6.74   10.36
   5   4  15   19.96    7.40
   5   3  15   64.07    8.62
   5   2  15   28.21    5.52
   5   1  15   73.69    7.14
   5   0  15  174.27   11.62
   5  -1  15   51.36    5.50
   5  -2  15   39.33    5.31
   5  -3  15   73.28    9.54
   5  -3  15   65.15    7.00
   5  -4  15   35.02   11.73
   5  -4  15   18.38    5.74
   4   5  15   11.84    7.65
   4   4  15    9.51    6.75
   4   3  15    5.33    5.59
   4   2  15    8.65    4.63
   4   1  15   49.40    5.84
   4   0  15   83.15    6.80
   4  -1  15   39.12    4.75
   4  -2  15   11.51    3.63
   4  -2  15   12.60    5.23
   4  -3  15   -5.90    7.82
   4  -3  15    6.14    4.18
   4  -4  15   15.53   12.70
   4  -4  15    2.45    4.86
   4  -5  15   12.49   23.42
   3   5  15   26.60    7.62
   3   4  15   22.43    6.75
  -3  -4 -15   16.33    4.23
   3   3  15  156.91   12.45
   3   2  15   12.73    4.49
   3   1  15  171.04   11.49
   3   0  15   63.14    5.68
   3  -1  15  178.39   11.53
   3  -2  15    6.46    3.39
   3  -2  15    9.75    5.58
   3  -3  15  222.28   16.47
   3  -3  15  157.93   11.96
   3  -4  15   56.24   15.88
   3  -5  15   70.79   32.74
   2   5  15   -0.28    6.47
  -2  -5 -15   -2.34    3.84
  -2  -4 -15   18.72    4.18
   2   4  15   14.78    6.35
   2   3  15   13.95    5.43
   2   2  15  105.72    8.77
   2   1  15   75.26    6.53
   2   0  15   80.88    6.39
   2  -1  15   80.79    6.51
   2  -2  15  127.63    9.24
   2  -3  15   19.85    4.78
   2  -4  15   22.78    5.45
   2  -5  15   -3.66    5.35
  -1  -5 -15    6.22    4.18
   1   5  15    7.44    6.23
   1   4  15   36.77    6.66
  -1  -4 -15   39.93    5.37
   1   3  15    0.80    4.95
  -1  -3 -15    6.85    3.44
   1   2  15  333.52   20.71
   1   1  15   14.53    3.28
   1   0  15  555.53   32.59
   1  -1  15   16.96    3.28
   1  -2  15  301.03   18.76
   1  -3  15    2.77    4.21
   1  -4  15   46.40    7.17
   1  -5  15    3.82    5.71
   0  -6 -15    7.80    4.81
   0  -5 -15   21.92    4.77
   0   5  15   36.14    6.80
   0   4  15   44.94    6.72
   0  -4 -15   41.29    5.58
   0   3  15   30.15    5.54
   0  -3 -15   27.30    4.17
   0  -2 -15   22.46    3.75
   0   2  15   29.60    4.53
   0   1  15   21.94    3.46
   0   0  15  225.18   14.03
   0  -1  15   16.40    3.25
   0  -2  15   26.12    4.42
   0  -3  15   35.13    5.50
   0  -4  15   53.77    7.58
   0  -5  15   25.28    6.52
   1  -6 -15   -0.95    4.80
   1  -5 -15   26.09    4.96
   1  -4 -15   12.91    3.97
  -1   4  15   17.84    5.34
   1  -3 -15  256.41   16.31
  -1   3  15  278.10   17.57
  -1   2  15   62.83    6.14
   1  -2 -15   51.50    5.61
  -1   1  15  521.24   30.70
  -1   0  15  162.16   10.57
  -1  -1  15  479.88   28.62
  -1  -2  15   56.03    6.64
  -1  -3  15  298.81   19.53
  -1  -4  15   18.59    5.82
  -1  -5  15   26.95    6.73
   2  -6 -15   17.23    5.46
   2  -5 -15   16.59    4.58
  -2   4  15   42.09    5.94
   2  -4 -15   36.42    5.48
  -2   3  15   10.97    4.43
   2  -3 -15    2.18    3.08
   2  -2 -15   62.39    5.97
  -2   2  15   69.50    6.43
  -2   1  15  269.70   16.52
  -2   0  15   50.59    5.07
  -2  -1  15  405.31   24.63
  -2  -2  15   70.87    7.33
  -2  -3  15    1.17    4.65
  -2  -4  15   47.18    7.12
  -2  -5  15   17.79    6.73
   3  -5 -15   22.65    5.02
   3  -4 -15   24.69    4.48
  -3   3  15   50.41    6.62
   3  -3 -15   48.61    5.60
  -3   2  15   78.88    6.98
   3  -2 -15   80.68    6.74
  -3   1  15  441.55   26.90
   3  -1 -15  470.69   26.18
  -3   0  15  129.65    8.96
  -3  -1  15  537.06   32.15
  -3  -2  15   96.58    8.93
  -3  -3  15   58.39    7.91
  -3  -4  15   30.92    6.48
  -3  -5  15   22.41    7.09
   4  -5 -15    0.48    4.31
   4  -4 -15   68.80    6.78
  -4   3  15   23.10    4.35
   4  -3 -15   22.14    3.97
   4  -2 -15  118.30    8.39
  -4   2  15  114.91    8.59
   4  -1 -15   17.60    3.16
  -4   1  15   26.78    4.06
  -4   0  15  126.83    8.99
  -4  -1  15   25.83    4.53
  -4  -2  15  143.74   11.41
  -4  -3  15   24.37    5.94
  -4  -4  15   85.07    9.90
  -4  -5  15    0.91    6.54
   5  -5 -15   10.89    4.88
   5  -4 -15  112.65    9.08
   5  -3 -15   39.99    5.33
   5  -2 -15  268.94   16.39
   5  -1 -15   26.93    4.13
  -5   1  15   32.79    4.34
  -5   0  15  258.84   16.21
  -5  -1  15   33.57    4.97
  -5  -2  15  317.17   20.83
  -5  -3  15   48.12    7.09
  -5  -4  15  103.19   10.72
  -5  -5  15   23.85    7.83
   6  -5 -15   51.85    7.24
   6  -4 -15   -0.35    3.81
   6  -3 -15   68.65    6.74
   6  -2 -15   51.81    5.30
  -6   2  15   40.58    5.10
   6  -1 -15  136.69    8.23
  -6   1  15   96.13    8.03
  -6   0  15  469.87   26.90
   6   0 -15  427.30   25.54
  -6  -1  15  163.82   12.14
  -6  -2  15   68.59    8.64
  -6  -3  15   80.31    9.57
  -6  -4  15    4.50    6.32
  -6  -5  15   51.89    9.38
   7  -5 -15   77.96    8.36
   7  -4 -15    4.44    4.10
   7  -3 -15   58.44    6.43
   7  -2 -15   20.93    3.74
  -7   1  15  351.80   20.64
   7  -1 -15  333.99   20.13
   7   0 -15   15.00    2.68
  -7   0  15   16.93    3.62
  -7  -1  15  386.29   24.21
  -7  -2  15   21.25    5.73
  -7  -3  15   57.73    8.74
  -7  -4  15    2.68    6.51
  -7  -5  15   75.36   11.70
   8  -5 -15   16.62    5.48
   8  -4 -15   22.91    4.98
   8  -3 -15  209.13   13.76
   8  -2 -15   63.14    6.24
  -8   1  15   34.09    4.67
   8   0 -15   73.10    6.05
   8   0 -15   78.18    5.39
  -8   0  15   84.15    7.22
  -8  -1  15   92.05    8.96
  -8  -2  15   64.78    8.73
  -8  -3  15  219.81   16.39
  -8  -4  15   17.65    7.49
  -8  -5  15   15.52    8.68
   9  -5 -15   14.32    5.51
   9  -4 -15  115.74    9.62
   9  -3 -15   13.15    4.12
   9  -2 -15  133.06    9.62
   9  -1 -15  375.91   22.44
   9  -1 -15  394.78   19.00
   9   0 -15  168.19   11.02
   9   0 -15  183.98    9.73
  -9   0  15  179.40   12.03
  -9  -1  15  426.28   26.55
  -9  -2  15  137.90   11.97
  -9  -3  15   16.53    6.66
  -9  -4  15  119.63   12.72
  -9  -5  15   17.88    9.10
  10  -5 -15   25.04    6.18
  10  -4 -15   29.49    5.50
  10  -3 -15    1.57    3.76
  10  -2 -15  215.32   13.81
  10  -1 -15   61.23    4.80
  10  -1 -15   55.28    5.56
  10   0 -15  225.02   13.93
  10   0 -15  236.78   12.23
 -10   0  15  232.43   15.08
  10   1 -15   62.53    5.20
 -10  -1  15   59.62    7.93
 -10  -2  15  244.05   17.38
 -10  -3  15   -3.51    6.14
 -10  -4  15   38.01    8.68
 -10  -5  15   19.42    9.45
  11  -4 -15    4.88    4.72
  11  -3 -15   26.31    4.82
  11  -2 -15   65.43    6.56
  11  -1 -15   77.61    6.53
  11  -1 -15   78.98    5.69
  11   0 -15  140.08    8.37
  11   1 -15   68.74    5.78
 -11  -1  15   80.26    8.56
 -11  -2  15   68.07    9.23
 -11  -3  15   26.65    7.52
 -11  -4  15   -1.57    7.30
  12  -4 -15    0.93    4.62
  12  -3 -15   91.07    8.28
  12  -2 -15   48.96    5.99
  12  -1 -15   37.65    3.82
  12  -1 -15   33.72    4.19
  12   0 -15    3.53    2.82
 -12  -1  15   34.00    6.05
 -12  -2  15   57.45    9.03
 -12  -3  15   88.95   10.96
 -12  -4  15    1.30    7.63
  13  -4 -15   36.20    6.25
  13  -3 -15   73.52    7.51
  13  -2 -15   20.68    4.16
  13  -1 -15  161.45    9.23
  13   0 -15   18.86    3.43
  13   1 -15  178.11   10.34
 -13  -2  15   17.43    6.54
  13   2 -15   24.81    4.01
 -13  -3  15   63.48   10.10
 -13  -4  15   29.77    8.82
  14  -4 -15   20.27    5.85
  14  -3 -15   30.49    5.31
  14  -2 -15  127.57    8.04
  14  -2 -15  127.77    9.62
  14  -1 -15   56.18    5.39
  14   0 -15   81.06    6.16
  14   1 -15   61.09    5.80
  14   2 -15   95.96    7.62
 -14  -2  15  128.12   11.73
 -14  -3  15   32.57    8.30
 -14  -4  15   15.24    8.62
  15  -3 -15    7.57    4.59
  15  -2 -15   57.57    5.66
  15  -1 -15   12.86    3.57
  15   0 -15   64.12    5.81
  15   1 -15    9.50    3.73
  15   2 -15   47.31    5.80
 -15  -3  15    0.19    7.61
  16  -2 -15   12.54    3.97
  16  -1 -15   11.76    3.79
  16   0 -15   91.26    6.96
  16   1 -15    9.50    3.93
  16   2 -15    7.47    4.18
  17  -2 -15   22.88    4.49
  17  -1 -15   57.29    6.12
  17   0 -15   23.73    4.30
  17   1 -15   52.77    6.03
  17   2 -15   16.06    4.62
  18  -2 -15   15.32    4.62
  18  -1 -15   36.90    5.05
  18   0 -15    2.00    3.90
  18   1 -15   32.55    5.03
  10   1  16    7.84    6.46
  10   0  16    3.12    6.11
  10  -1  16    9.87    6.56
   9   2  16    3.55    6.36
   9   1  16   10.74    6.08
   9   0  16   44.28    6.94
   9  -1  16   12.78    5.65
   9  -2  16   11.53    5.95
   8   2  16    0.15    5.78
   8   1  16   28.35    6.19
   8   0  16   31.58    5.90
   8  -1  16   31.73    5.71
   8  -2  16    3.55    5.09
   7   3  16   15.77    6.98
   7   2  16   42.32    6.92
   7   1  16   15.63    5.31
   7   0  16  123.86    9.74
   7  -1  16   20.10    4.80
   7  -2  16   62.31    7.22
   7  -3  16   16.79    5.57
   7  -4  16    2.18   10.18
   6   3  16   12.57    6.56
   6   2  16   83.97    8.87
   6   1  16    6.74    4.61
   6   0  16   24.00    4.63
   6  -1  16    9.65    4.01
   6  -2  16   96.01    8.27
   6  -3  16   20.71    5.28
   6  -3  16   23.20    7.74
   6  -4  16    9.78   10.85
   5   4  16   44.31    8.64
   5   3  16   20.88    6.58
   5   2  16  104.84    9.57
   5   1  16    4.79    4.21
   5   0  16   63.37    6.36
   5  -1  16   -0.55    3.47
   5  -2  16  105.18    8.52
   5  -3  16   23.62    7.91
   5  -3  16   20.12    4.97
   5  -4  16   44.61   12.45
   4   4  16   27.23    7.60
   4   3  16   78.52    9.34
   4   2  16   29.49    5.68
   4   1  16   50.81    5.99
   4   0  16    7.03    3.46
   4  -1  16   56.50    5.68
   4  -2  16   32.09    4.68
   4  -3  16   73.56    7.68
   4  -3  16  105.36   11.39
   4  -4  16   50.15   13.95
   4  -4  16   20.64    5.70
   3   5  16    0.06    7.64
   3   4  16    3.68    6.57
   3   3  16   33.08    6.66
   3   2  16   43.40    6.64
   3   1  16  177.56   11.94
   3   0  16   71.60    6.22
   3  -1  16  185.25   12.10
   3  -2  16   44.92    5.69
   3  -3  16   34.75    5.43
   3  -3  16   44.64   10.07
   3  -4  16    1.43    4.89
   3  -4  16   17.66   14.17
  -2  -5 -16    2.13    4.44
   2   5  16    3.09    7.23
  -2  -4 -16   19.80    4.53
   2   4  16   20.95    6.77
   2   3  16   23.60    6.08
   2   2  16   27.15    5.04
   2   1  16   58.96    5.95
   2   0  16   26.94    3.78
   2  -1  16   90.90    7.19
   2  -2  16   44.90    5.73
   2  -3  16   30.21    5.23
   2  -4  16   17.66    5.43
   2  -5  16   59.28   49.99
  -1  -5 -16    6.80    4.31
   1   5  16    6.89    6.77
   1   4  16   79.38    9.24
  -1  -4 -16   52.18    6.33
  -1  -3 -16    7.06    3.72
   1   3  16    8.63    5.48
   1   2  16   48.92    6.38
   1   1  16  160.83   10.88
   1   0  16   19.24    3.37
   1  -1  16  177.99   11.73
   1  -2  16   86.52    7.50
   1  -3  16   12.30    4.63
   1  -4  16   51.46    7.49
   1  -5  16    5.93    5.79
   0  -5 -16   14.65    4.65
   0  -4 -16   26.83    4.63
   0   4  16   22.43    6.25
   0   3  16    2.84    5.10
   0  -3 -16    7.70    3.66
   0   2  16  180.96   12.45
   0   1  16    5.65    3.14
   0   0  16   58.71    5.42
   0  -1  16    7.39    3.20
   0  -2  16  176.48   12.35
   0  -3  16   10.53    4.74
   0  -4  16   35.93    6.22
   0  -5  16   16.22    6.33
   1  -5 -16   19.20    4.78
  -1   4  16    6.34    5.32
   1  -4 -16    1.20    3.75
   1  -3 -16   75.41    6.86
  -1   3  16   82.80    8.57
   1  -2 -16   40.11    5.36
  -1   2  16   47.16    5.78
  -1   1  16  353.08   21.30
  -1   0  16  133.26    9.21
  -1  -1  16  414.92   25.05
  -1  -2  16   50.07    6.68
  -1  -3  16   87.52    8.75
  -1  -4  16    7.49    5.47
  -1  -5  16   25.98    6.96
   2  -5 -16   11.30    4.61
  -2   4  16    7.35    5.09
   2  -4 -16    4.65    3.68
  -2   3  16  197.34   13.95
   2  -3 -16  197.77   12.88
   2  -2 -16    4.46    3.09
  -2   2  16    3.19    3.65
  -2   1  16  114.74    8.25
  -2   0  16   49.21    5.17
  -2  -1  16  214.89   14.11
  -2  -2  16    4.70    4.08
  -2  -3  16  231.55   16.25
  -2  -4  16    0.77    5.46
  -2  -5  16   13.06    6.71
   3  -5 -16   12.72    4.78
   3  -4 -16   34.48    5.11
   3  -3 -16   86.72    7.32
  -3   3  16   90.16    8.47
  -3   2  16   10.80    3.71
   3  -2 -16   11.88    3.33
   3  -1 -16  258.62   14.22
  -3   1  16  203.08   14.28
  -3   0  16  209.16   13.43
  -3  -1  16  288.94   18.35
  -3  -2  16   16.45    4.83
  -3  -3  16  104.52   10.14
  -3  -4  16   38.29    7.20
  -3  -5  16   13.11    7.07
   4  -5 -16   -0.78    4.47
   4  -4 -16   57.69    6.66
  -4   3  16   24.09    4.79
   4  -3 -16   34.61    4.97
   4  -2 -16  152.76   10.98
  -4   2  16  177.04   11.30
   4  -1 -16  143.72    9.73
  -4   1  16  146.85    9.81
  -4   0  16   79.31    6.71
  -4  -1  16  180.21   12.68
  -4  -2  16  187.99   13.80
  -4  -3  16   46.17    7.09
  -4  -4  16   69.15    9.49
  -4  -5  16    1.84    6.97
   5  -5 -16   15.39    5.22
   5  -4 -16   42.92    6.02
   5  -3 -16   48.12    5.78
  -5   2  16  110.42    7.84
   5  -2 -16   84.96    7.61
  -5   1  16   98.20    7.06
   5  -1 -16   80.49    6.91
  -5   0  16   73.31    6.62
  -5  -1  16   95.70    8.64
  -5  -2  16  106.05   10.11
  -5  -3  16   52.80    8.35
  -5  -4  16   49.01    8.05
  -5  -5  16   11.75    7.60
   6  -5 -16   60.81    7.90
   6  -4 -16   29.13    5.17
   6  -3 -16   37.17    5.69
  -6   2  16  103.43    7.96
  -6   1  16  227.77   15.07
   6  -1 -16  259.35   14.91
  -6   0  16   20.70    3.80
  -6  -1  16  298.97   19.30
  -6  -2  16  175.63   13.64
  -6  -3  16   55.32    7.95
  -6  -4  16   26.59    7.33
  -6  -5  16   61.47    9.82
   7  -5 -16    5.03    5.09
   7  -4 -16    6.63    4.39
   7  -3 -16  103.31    8.49
   7  -2 -16  170.10   11.41
   7  -1 -16  199.88   11.85
  -7   1  16  168.32   11.81
   7   0 -16  152.22   10.01
  -7   0  16  162.65   11.01
  -7  -1  16  233.06   15.93
  -7  -2  16  196.30   14.70
  -7  -3  16  110.93   11.36
  -7  -4  16    4.61    6.76
  -7  -5  16   10.77    8.26
   8  -5 -16   11.82    5.61
   8  -4 -16   12.04    4.77
   8  -3 -16  160.97   11.45
   8  -2 -16  116.63    8.80
  -8   1  16  317.94   17.96
   8  -1 -16  266.89   17.45
   8   0 -16    8.46    2.61
  -8   0  16   10.59    3.54
  -8  -1  16  303.82   19.79
  -8  -2  16  126.90   11.55
  -8  -3  16  168.62   14.15
  -8  -4  16   11.44    7.42
  -8  -5  16    8.72    8.60
   9  -5 -16    6.39    5.45
   9  -4 -16   60.24    7.53
   9  -3 -16   13.50    4.31
   9  -2 -16   35.40    5.28
   9  -1 -16   97.77    7.50
  -9   0  16   42.09    5.95
   9   0 -16   42.27    4.45
   9   0 -16   40.96    4.65
  -9  -1  16  106.92    9.97
  -9  -2  16   35.71    6.75
  -9  -3  16   13.06    6.73
  -9  -4  16   45.87    9.06
  -9  -5  16   -1.53    8.56
  10  -4 -16   69.26    7.77
  10  -3 -16    8.32    4.22
  10  -2 -16  162.43   11.19
  10  -1 -16   39.56    5.09
  10   0 -16  495.31   23.96
  10   0 -16  476.06   27.82
 -10   0  16  490.94   29.30
 -10  -1  16   44.36    6.35
 -10  -2  16  166.32   13.66
 -10  -3  16    8.53    6.83
 -10  -4  16   66.03   10.24
  11  -4 -16   63.79    7.94
  11  -3 -16   14.12    4.56
  11  -2 -16  173.10   11.78
  11  -1 -16   46.29    4.66
  11  -1 -16   36.74    5.00
  11   0 -16  142.45    8.53
 -11  -1  16   42.24    6.27
  11   1 -16   36.81    4.05
 -11  -2  16  178.99   14.34
 -11  -3  16   12.10    7.03
 -11  -4  16   62.45   10.07
  12  -4 -16    8.71    5.18
  12  -3 -16  130.45   10.31
  12  -2 -16   26.62    4.49
  12  -1 -16   46.86    4.85
  12  -1 -16   42.14    5.28
  12   0 -16  245.41   13.14
 -12  -1  16   47.06    6.65
  12   1 -16   39.43    5.00
 -12  -2  16   26.83    6.83
 -12  -3  16  136.32   13.34
 -12  -4  16    8.34    8.19
  13  -4 -16   14.56    5.57
  13  -3 -16   21.80    4.99
  13  -2 -16   29.83    4.68
  13  -1 -16   25.06    3.69
  13   0 -16    4.12    3.11
  13   1 -16   14.28    3.63
 -13  -2  16   32.40    7.29
 -13  -3  16   22.49    8.05
 -13  -4  16   10.40    8.25
  14  -4 -16   38.64    6.62
  14  -3 -16   92.16    8.72
  14  -2 -16   86.57    7.84
  14  -1 -16  125.60    8.03
  14   0 -16   -0.64    3.18
  14   1 -16  135.15    8.83
  14   2 -16   67.47    6.57
 -14  -2  16   95.96   10.94
 -14  -3  16   90.71   12.05
 -14  -4  16   30.84    9.45
  15  -3 -16   14.53    5.03
  15  -1 -16    8.27    3.50
  15   0 -16    3.89    3.44
  15   1 -16    6.95    3.73
  15   2 -16   64.88    6.40
 -15  -3  16   11.10    8.14
  16  -1 -16   13.60    3.85
  16   0 -16   86.40    6.80
  16   1 -16   15.35    4.12
  16   2 -16   66.77    6.65
  17  -2 -16   13.94    4.33
  17  -1 -16    2.35    3.84
  17   0 -16    1.41    3.71
  17   1 -16    4.46    4.05
  18  -2 -16    7.19    4.41
  18  -1 -16   71.06    6.80
  18   0 -16   -0.04    3.96
   9   1  17   18.57    6.57
   9   0  17    1.86    5.63
   9  -1  17   22.12    6.32
   8   2  17   36.53    7.21
   8   1  17   42.69    6.93
   8   0  17    0.10    5.18
   8  -1  17   55.26    7.61
   8  -2  17   38.90    6.59
   7   2  17    4.97    5.92
   7   1  17    5.89    5.23
   7   0  17    2.44    4.70
   7  -1  17    8.43    4.80
   7  -2  17    1.90    4.80
   7  -3  17    3.49    5.52
   6   3  17   18.47    7.12
   6   2  17   22.04    6.18
   6   1  17    1.57    4.61
   6   0  17   67.48    7.16
   6  -1  17   -1.32    4.21
   6  -2  17   35.21    5.53
   6  -3  17   18.44    5.54
   6  -4  17   22.07   11.34
   5   3  17   13.73    6.78
   5   2  17   70.64    8.40
   5   1  17    4.85    4.46
   5   0  17   15.10    4.34
   5  -1  17    9.05    4.04
   5  -2  17   78.85    7.59
   5  -3  17    5.36    4.78
   5  -4  17   17.55   11.52
   4   4  17    7.07    7.32
   4   3  17   39.78    7.45
   4   2  17   18.42    5.57
   4   1  17  136.69   10.24
   4   0  17   27.55    4.42
   4  -1  17  134.79    9.74
   4  -2  17   22.63    4.58
   4  -3  17   37.42    5.74
   4  -3  17   39.24    9.35
   4  -4  17    6.09    5.42
   4  -4  17   11.57   12.85
   3   4  17    6.91    7.25
   3   3  17   39.31    7.23
   3   2  17   34.79    5.90
   3   1  17    5.91    3.90
   3   0  17    0.36    3.36
   3  -1  17   11.08    3.61
   3  -2  17   29.42    4.75
   3  -3  17   52.90   10.36
   3  -3  17   43.40    6.61
   3  -4  17    5.12    5.11
   3  -4  17   21.54   14.45
   2   5  17    9.14    7.74
  -2  -5 -17    3.64    4.64
   2   4  17    7.45    6.95
   2   3  17   92.06   10.00
   2   2  17   25.17    5.30
   2   1  17  155.04   10.83
   2   0  17    6.83    3.33
   2  -1  17  138.81    9.74
   2  -2  17   31.23    4.81
   2  -3  17   77.01    7.84
   2  -4  17   17.75    5.66
   2  -4  17   34.20   16.96
   2  -5  17   -2.45    5.87
   1   5  17    4.13    7.12
  -1  -5 -17   -0.58    4.37
  -1  -4 -17   80.06    7.70
   1   4  17   99.05   10.50
   1   3  17    9.47    5.93
   1   2  17   64.57    7.30
   1   1  17   21.56    4.13
   1   0  17    7.43    3.18
   1  -1  17   24.74    4.00
   1  -2  17   54.58    6.36
   1  -3  17   14.04    5.01
   1  -4  17  101.43    9.67
   1  -5  17    4.27    5.97
   0  -5 -17   24.21    5.13
   0  -4 -17   44.93    6.18
   0   4  17   59.90    8.97
   0   3  17    4.29    5.53
   0  -3 -17    4.49    3.64
   0   2  17  161.45   11.63
   0   1  17    4.28    3.34
   0   0  17  511.82   30.32
   0  -1  17    9.56    3.47
   0  -2  17  217.96   14.61
   0  -3  17    6.74    4.86
   0  -4  17   49.18    7.76
   0  -5  17   27.03    6.83
   1  -5 -17   25.91    5.21
   1  -4 -17    5.42    4.10
  -1   4  17   15.88    6.21
   1  -3 -17   42.89    5.67
  -1   3  17   41.01    6.56
  -1   2  17    3.86    4.05
  -1   1  17   73.01    6.54
  -1   0  17    9.90    3.23
  -1  -1  17  102.79    8.26
  -1  -2  17    5.29    4.25
  -1  -3  17   50.50    7.47
  -1  -4  17   12.04    5.80
  -1  -5  17   25.40    7.08
   2  -5 -17   31.26    5.54
   2  -4 -17   20.84    4.62
  -2   3  17  142.46   10.84
   2  -3 -17  114.51    9.23
   2  -2 -17   29.17    4.47
  -2   2  17   43.03    5.66
  -2   1  17  203.21   13.08
  -2   0  17   37.46    4.90
  -2  -1  17  232.98   15.13
  -2  -2  17   40.94    6.57
  -2  -3  17  137.45   11.47
  -2  -4  17   25.34    6.55
  -2  -5  17   37.26    7.69
   3  -5 -17   -1.57    4.49
   3  -4 -17   24.53    4.73
  -3   3  17   53.36    7.55
   3  -3 -17   55.02    6.22
   3  -2 -17   31.54    4.36
  -3   2  17   31.58    4.69
  -3   1  17   17.98    3.51
  -3   0  17   -0.06    2.88
  -3  -1  17   21.70    4.44
  -3  -2  17   36.13    5.89
  -3  -3  17   65.36    8.57
  -3  -4  17   32.61    7.04
  -3  -5  17    6.70    6.95
   4  -5 -17    4.91    4.76
   4  -4 -17   50.77    6.49
   4  -3 -17   64.74    6.37
  -4   3  17   44.86    7.20
   4  -2 -17  108.06    8.08
  -4   2  17  105.96    8.52
  -4   1  17   75.31    6.95
   4  -1 -17  103.23    7.11
  -4   0  17  266.89   16.75
  -4  -1  17  117.45    9.55
  -4  -2  17  135.34   11.15
  -4  -3  17   76.54    9.19
  -4  -4  17   63.14    9.23
  -4  -5  17   10.49    7.29
   5  -5 -17    2.57    5.02
   5  -4 -17   41.95    6.36
   5  -3 -17    6.32    3.76
   5  -2 -17    6.79    3.39
  -5   2  17    3.99    3.43
   5  -1 -17   17.91    3.46
  -5   1  17   19.82    3.47
  -5   0  17   68.25    6.50
  -5  -1  17   22.59    4.83
  -5  -2  17   10.83    5.29
  -5  -3  17    4.33    5.85
  -5  -4  17   51.10    8.39
  -5  -5  17    5.37    7.62
   6  -5 -17   10.92    5.32
   6  -4 -17   49.51    6.81
   6  -3 -17   56.86    6.52
  -6   2  17  179.25   12.63
   6  -2 -17  206.23   12.69
  -6   1  17    1.04    2.85
   6  -1 -17   10.76    3.12
  -6   0  17  414.81   25.09
  -6  -1  17   10.34    4.57
  -6  -2  17  234.60   16.74
  -6  -3  17   69.65    9.65
  -6  -4  17   55.92    8.77
  -6  -5  17    7.02    8.09
   7  -5 -17    8.56    5.55
   7  -4 -17    9.29    4.73
   7  -3 -17   84.43    7.83
   7  -2 -17   75.70    7.00
   7  -1 -17   53.45    5.68
  -7   1  17   60.98    5.80
  -7   0  17  189.02   12.74
  -7  -1  17   61.03    7.45
  -7  -2  17   78.17    9.34
  -7  -3  17  101.76   11.17
  -7  -4  17    9.93    7.17
   8  -4 -17   16.41    5.28
   8  -3 -17  114.05    9.29
   8  -2 -17   62.28    6.47
  -8   1  17  175.98   11.28
   8  -1 -17  161.30   11.08
  -8   0  17   15.00    3.88
  -8  -1  17  175.73   13.11
  -8  -2  17   77.80    9.45
  -8  -3  17  118.87   12.09
  -8  -4  17   15.84    7.87
   9  -4 -17   38.91    6.26
   9  -3 -17   15.77    4.60
   9  -2 -17   47.34    5.91
   9  -1 -17   74.53    6.58
   9   0 -17   60.93    5.59
  -9   0  17   61.28    6.83
  -9  -1  17   85.47    9.16
  -9  -2  17   50.03    7.69
  -9  -3  17   18.19    7.00
  -9  -4  17   39.67    8.94
  10  -4 -17   95.73    9.30
  10  -3 -17   16.77    4.74
  10  -2 -17  212.65   13.84
  10  -1 -17   50.38    5.62
 -10   0  17   42.42    6.24
  10   0 -17   51.37    4.91
  10   0 -17   42.07    4.96
 -10  -1  17   59.33    8.08
 -10  -2  17  237.98   17.41
 -10  -3  17   14.08    7.17
 -10  -4  17   90.42   12.22
  11  -4 -17    1.28    5.04
  11  -3 -17   34.93    5.61
  11  -2 -17   71.24    7.09
  11  -1 -17   22.73    3.79
  11   0 -17   29.77    3.70
 -11  -1  17   21.46    5.76
 -11  -2  17   71.64    9.85
 -11  -3  17   29.46    7.83
 -11  -4  17    2.44    8.07
  12  -4 -17   17.18    5.79
  12  -3 -17   98.31    8.99
  12  -2 -17   63.43    6.89
  12  -1 -17  140.35    9.84
  12   0 -17   42.07    5.31
  12   1 -17  163.86    9.49
 -12  -1  17  147.95   12.64
 -12  -2  17   65.74    9.77
 -12  -3  17   97.29   11.92
 -12  -4  17   13.74    8.74
  13  -4 -17   21.05    5.94
  13  -3 -17   34.10    5.68
  13  -2 -17    1.26    3.68
  13   0 -17   -1.50    3.09
  13   1 -17   18.48    3.81
 -13  -2  17   -1.39    6.23
 -13  -3  17   33.27    8.58
 -13  -4  17   20.08    9.09
  14  -3 -17   49.13    7.43
  14  -2 -17    3.87    3.97
  14  -1 -17  177.01   10.29
  14   0 -17   45.05    5.51
  14   1 -17  151.40    9.57
 -14  -3  17   53.64    9.59
  15  -3 -17    4.63    4.89
  15  -1 -17    6.74    3.67
  15   0 -17    1.58    3.51
  15   1 -17    7.32    3.80
 -15  -3  17    6.28    8.11
  16  -1 -17   -1.90    3.57
  16   0 -17   20.64    4.18
  16   1 -17    2.29    3.95
  16   2 -17   49.10    6.25
  17  -1 -17    8.73    4.08
  17   0 -17   45.92    5.89
  17   1 -17    6.61    4.21
  18  -1 -17   57.87    6.41
   8   0  18   -0.76    5.52
   8  -1  18   63.53    8.32
   8  -2  18    0.73    5.90
   7   1  18   12.86    5.81
   7   0  18   22.94    5.70
   7  -1  18   10.21    5.24
   7  -2  18   37.52    6.38
   6   2  18   57.67    8.49
   6   1  18   41.22    6.41
   6   0  18  102.11    8.96
   6  -1  18   41.85    6.54
   6  -2  18   50.43    7.15
   6  -3  18   26.44    6.22
   5   3  18   13.74    7.04
   5   2  18   47.92    7.19
   5   1  18    3.31    4.74
   5   0  18    9.67    4.43
   5  -1  18    2.40    4.28
   5  -2  18   52.46    6.94
   5  -3  18   12.46    5.31
   4   3  18   30.40    7.33
   4   2  18   75.53    8.62
   4   1  18   20.91    5.02
   4   0  18  105.87    8.59
   4  -1  18   24.71    4.73
   4  -2  18   83.91    7.76
   4  -3  18   32.21    5.81
   4  -4  18   13.94   12.22
   4  -4  18    5.50    5.74
   3   4  18    0.79    7.36
   3   3  18   20.34    6.75
   3   2  18   10.87    5.27
   3   1  18   48.27    6.23
   3   0  18   13.38    4.14
   3  -1  18   46.74    5.89
   3  -2  18   15.75    4.57
   3  -3  18   23.39    5.44
   3  -4  18   -5.51   13.09
   3  -4  18   -0.11    5.30
   2   4  18   11.49    7.35
   2   3  18  105.47   10.77
   2   2  18   20.90    5.54
   2   1  18   72.38    7.14
   2   0  18   33.24    4.65
   2  -1  18   65.90    6.43
   2  -2  18   21.14    4.78
   2  -3  18  146.92   14.67
   2  -3  18  104.01    9.59
   2  -4  18   27.22   15.65
   1   4  18   11.77    7.09
  -1  -4 -18   12.65    4.51
   1   3  18   -0.49    5.91
   1   2  18   69.30    7.74
   1   1  18   40.88    5.66
   1   0  18   31.02    4.96
   1  -1  18   41.69    5.40
   1  -2  18   60.63    6.98
   1  -3  18    1.88    4.77
   1  -4  18   14.28    5.86
   0   4  18   67.60    9.78
   0  -4 -18   60.61    6.67
   0   3  18   10.88    6.04
   0   2  18  205.22   14.11
   0   1  18   11.23    3.96
   0   0  18   69.01    6.35
   0  -1  18   17.10    4.12
   0  -2  18  232.78   15.52
   0  -3  18   12.99    5.33
   0  -4  18   72.26    8.76
   1  -4 -18    7.23    4.35
  -1   4  18   12.88    6.52
   1  -3 -18   17.92    4.32
  -1   3  18   18.58    6.27
  -1   2  18   35.96    5.38
  -1   1  18   19.91    4.09
  -1   0  18   23.69    3.99
  -1  -1  18   36.54    5.53
  -1  -2  18   49.09    6.75
  -1  -3  18   21.93    5.74
  -1  -4  18    7.94    5.84
   2  -4 -18    1.89    4.12
   2  -3 -18   91.79    8.01
  -2   3  18   93.27    9.57
   2  -2 -18   84.04    6.96
  -2   2  18   68.04    7.42
  -2   1  18  114.35    8.59
  -2   0  18   17.52    3.75
  -2  -1  18  139.02   10.28
  -2  -2  18   99.09    9.30
  -2  -3  18  112.41   10.49
  -2  -4  18    2.00    5.80
   3  -4 -18   23.89    5.06
  -3   3  18   48.07    7.44
   3  -3 -18   32.26    5.04
   3  -2 -18    3.15    3.48
  -3   2  18    4.48    4.12
  -3   1  18  134.01    9.51
  -3   0  18    3.13    3.33
  -3  -1  18  150.63   11.10
  -3  -2  18    6.73    4.93
  -3  -3  18   41.59    6.87
  -3  -4  18   27.94    7.12
   4  -4 -18   53.84    6.82
   4  -3 -18   30.56    4.96
   4  -2 -18   85.03    7.19
  -4   2  18   80.89    7.59
  -4   1  18  145.31   10.09
  -4   0  18   36.29    5.45
  -4  -1  18  162.91   12.01
  -4  -2  18  105.22    9.85
  -4  -3  18   36.29    7.05
  -4  -4  18   62.71    8.88
   5  -4 -18    7.44    4.55
   5  -3 -18    0.81    3.77
   5  -2 -18  206.60   13.95
  -5   2  18  231.46   14.46
  -5   1  18   41.01    5.36
   5  -1 -18   48.91    5.33
  -5   0  18  206.46   13.63
  -5  -1  18   58.98    7.35
  -5  -2  18  262.27   18.07
  -5  -3  18    5.41    6.16
  -5  -4  18   12.74    7.08
   6  -4 -18   33.66    5.69
   6  -3 -18   30.15    4.99
   6  -2 -18  164.39   11.25
  -6   1  18    6.91    3.24
   6  -1 -18    2.38    3.01
  -6   0  18  215.07   14.12
  -6  -1  18    3.92    4.55
  -6  -2  18  200.01   15.00
  -6  -3  18   32.12    7.39
  -6  -4  18   31.95    8.14
   7  -4 -18   12.55    5.03
   7  -3 -18  128.13    9.82
   7  -2 -18   28.64    4.59
  -7   1  18  182.93   12.39
   7  -1 -18  194.44   12.26
  -7   0  18  444.83   26.89
  -7  -1  18  240.93   16.47
  -7  -2  18   32.64    6.89
  -7  -3  18  133.94   12.57
  -7  -4  18   12.79    7.65
   8  -4 -18   13.19    5.21
   8  -3 -18  144.00   10.84
   8  -2 -18    1.85    3.51
   8  -1 -18  215.47   13.31
  -8   1  18  206.04   13.61
  -8   0  18  106.68    8.74
  -8  -1  18  259.85   17.52
  -8  -2  18    1.93    5.92
  -8  -3  18  135.97   13.06
  -8  -4  18   16.67    8.05
   9  -4 -18   18.60    5.64
   9  -3 -18   40.78    5.81
   9  -2 -18   35.87    5.50
   9  -1 -18   74.51    6.68
  -9   0  18   -0.18    3.66
  -9  -1  18   86.14    9.06
  -9  -2  18   45.43    7.60
  -9  -3  18   41.56    8.35
  -9  -4  18   16.30    8.17
  10  -4 -18   -0.27    5.11
  10  -3 -18    3.66    4.46
  10  -2 -18   72.18    7.10
  10  -1 -18   38.19    5.33
  10   0 -18   79.86    6.67
 -10   0  18   81.96    7.84
 -10  -1  18   41.04    6.47
 -10  -2  18   82.69   10.35
 -10  -3  18    2.11    7.08
 -10  -4  18    6.26    8.10
  11  -4 -18   45.98    7.03
  11  -3 -18   13.12    4.83
  11  -2 -18  145.51   10.58
  11  -1 -18    9.58    3.47
 -11  -1  18    8.99    5.40
 -11  -2  18  173.80   14.46
 -11  -3  18    6.66    7.22
 -11  -4  18   38.11    9.73
  12  -3 -18  115.70    9.95
  12  -2 -18   38.18    5.25
  12  -1 -18   21.23    3.89
  12   0 -18   74.95    6.25
 -12  -1  18   17.10    5.75
 -12  -2  18   46.14    8.21
 -12  -3  18  103.32   12.37
  13  -3 -18   33.00    5.95
  13  -2 -18   39.79    6.18
  13   0 -18  110.88    7.78
  13   1 -18  122.20    8.29
 -13  -2  18   43.36    8.28
 -13  -3  18   37.73    8.99
  14  -3 -18   17.37    5.36
  14  -2 -18   15.92    4.51
  14   0 -18    2.29    3.52
  14   1 -18   54.56    6.10
 -14  -3  18    7.05    8.07
  15  -3 -18   12.11    5.27
  15   0 -18   72.82    6.68
  15   1 -18   62.23    6.53
 -15  -3  18    8.57    8.37
  16   0 -18   33.52    4.80
  16   1 -18   27.45    4.72
  17   0 -18  151.07   10.01
   7  -1  19   12.61    5.59
   6   1  19    9.12    5.69
   6   0  19   37.36    6.20
   6  -1  19   15.19    5.29
   6  -2  19   21.32    5.71
   5   2  19   37.53    7.02
   5   1  19   -0.37    4.98
   5   0  19   75.17    7.84
   5  -1  19   -3.13    4.56
   5  -2  19   32.27    5.76
   5  -3  19   21.27    5.91
   4   2  19   11.26    6.02
   4   1  19   19.35    5.32
   4   0  19   78.47    7.66
   4  -1  19   21.80    4.99
   4  -2  19    8.33    4.82
   4  -3  19   22.59    5.66
   3   3  19   21.45    7.32
   3   2  19    3.29    5.61
   3   1  19  105.06    9.00
   3   0  19   13.89    4.52
   3  -1  19  114.11    9.05
   3  -2  19    1.53    4.45
   3  -3  19   16.08    5.48
   3  -4  19    4.89   12.50
   2   3  19   40.84    7.74
   2   2  19    7.42    5.33
   2   1  19  121.34    9.66
   2   0  19    2.63    3.96
   2  -1  19  141.67   10.40
   2  -2  19   17.54    4.80
   2  -3  19   43.63    6.52
   2  -4  19   48.42   15.43
   1   4  19   51.48    9.20
   1   3  19   51.42    8.04
   1   2  19  115.85   10.06
   1   1  19   32.62    5.19
   1   0  19   36.10    5.02
   1  -1  19   31.36    4.79
   1  -2  19  121.12    9.92
   1  -3  19   42.85    6.47
   1  -4  19   38.05    6.87
   0   4  19   14.16    7.35
   0  -4 -19    7.37    4.70
   0   3  19   19.87    6.80
   0   2  19   24.94    5.49
   0   1  19   38.46    5.77
   0   0  19   50.73    6.02
   0  -1  19   37.56    5.71
   0  -2  19   28.42    5.43
   0  -3  19   16.25    5.50
   0  -4  19    3.51    5.75
   1  -4 -19   41.98    5.85
  -1   4  19   36.93    8.00
   1  -3 -19   15.30    4.70
  -1   3  19   31.90    6.84
  -1   2  19  165.01   12.09
  -1   1  19   63.22    6.61
  -1   0  19  349.45   21.47
  -1  -1  19   65.18    7.02
  -1  -2  19  174.88   12.68
  -1  -3  19   16.82    5.90
  -1  -4  19   46.99    7.50
   2  -4 -19    8.00    4.49
   2  -3 -19   43.41    6.24
  -2   3  19   48.58    7.25
  -2   2  19   34.24    5.59
  -2   1  19   32.51    4.71
  -2   0  19  105.73    8.36
  -2  -1  19   37.56    5.42
  -2  -2  19   32.08    5.85
  -2  -3  19   51.57    7.99
  -2  -4  19    9.04    6.19
   3  -4 -19    6.10    4.53
  -3   3  19   92.37    9.27
   3  -3 -19   70.48    7.53
   3  -2 -19   -0.08    3.58
  -3   2  19    1.72    4.37
  -3   1  19  257.02   16.35
  -3   0  19    2.14    3.62
  -3  -1  19  278.10   17.99
  -3  -2  19    1.19    4.89
  -3  -3  19   82.69    9.44
  -3  -4  19    3.18    6.31
   4  -4 -19   18.74    5.09
   4  -3 -19   14.56    4.36
   4  -2 -19   32.21    4.91
  -4   2  19   37.02    5.29
  -4   1  19   84.76    7.33
  -4   0  19    3.39    3.62
  -4  -1  19  100.90    8.92
  -4  -2  19   38.99    6.58
  -4  -3  19   18.83    6.42
  -4  -4  19   19.55    7.34
   5  -4 -19   45.35    6.81
   5  -3 -19   36.16    5.48
  -5   2  19  122.32    9.91
   5  -2 -19  136.58    9.73
  -5   1  19   73.54    6.75
  -5   0  19  187.15   12.73
  -5  -1  19   83.64    8.61
  -5  -2  19  156.49   12.80
  -5  -3  19   46.96    7.99
  -5  -4  19   49.90    8.62
   6  -4 -19   45.72    6.95
   6  -3 -19    4.52    4.24
   6  -2 -19   37.19    5.45
  -6   1  19   32.51    5.18
   6  -1 -19   30.15    4.33
  -6   0  19   17.78    4.15
  -6  -1  19   37.28    5.98
  -6  -2  19   47.66    7.20
  -6  -3  19    8.16    6.76
  -6  -4  19   66.20    9.64
   7  -4 -19   29.08    5.84
   7  -3 -19   24.43    5.07
   7  -2 -19   75.39    7.25
  -7   1  19   50.71    5.78
   7  -1 -19   41.57    5.71
  -7   0  19  109.39    8.84
  -7  -1  19   51.91    7.80
  -7  -2  19   82.73    9.75
  -7  -3  19   21.18    7.58
  -7  -4  19   33.64    8.71
   8  -4 -19   12.90    5.41
   8  -3 -19   36.40    5.59
   8  -2 -19    4.10    3.77
   8  -1 -19   41.63    5.42
  -8   0  19    1.83    3.73
  -8  -1  19   49.84    6.80
  -8  -2  19    3.17    6.04
  -8  -3  19   47.09    8.61
  -8  -4  19   10.18    8.21
   9  -4 -19   22.43    5.95
   9  -3 -19   82.82    8.17
   9  -2 -19    9.42    4.02
   9  -1 -19  311.62   18.82
  -9   0  19   25.37    4.69
  -9  -1  19  367.34   23.55
  -9  -2  19   16.21    6.65
  -9  -3  19   89.38   11.55
  -9  -4  19   22.03    8.93
  10  -3 -19   24.83    5.35
  10  -2 -19   42.27    6.13
  10  -1 -19    6.65    3.40
 -10  -1  19   -0.07    4.85
 -10  -2  19   54.49    8.34
 -10  -3  19   22.66    8.06
  11  -3 -19    4.46    4.74
  11  -2 -19  114.29    9.15
  11  -1 -19   10.09    3.52
 -11  -1  19   11.35    5.35
 -11  -2  19  125.70   12.38
 -11  -3  19    0.00    7.40
  12  -3 -19   10.04    5.03
  12  -2 -19    9.36    4.11
  12  -1 -19    5.15    3.48
 -12  -2  19    5.72    6.96
 -12  -3  19   11.94    8.18
  13  -3 -19   49.92    6.72
  13  -2 -19   42.66    5.68
 -13  -2  19   43.85    8.47
 -13  -3  19   50.60    9.83
  14  -3 -19   25.73    5.88
 -14  -3  19   20.45    8.74
  15   0 -19   35.74    4.95
  15   1 -19   90.39    7.56
  16   0 -19   -2.00    3.96
  16   1 -19    0.98    3.98
  17   0 -19  117.61    8.93
   5   0  20   15.04    5.43
   5  -1  20    2.73    5.14
   4   1  20    2.18    5.32
   4   0  20    3.80    4.84
   4  -1  20    6.18    4.81
   4  -2  20    9.08    5.28
   3   2  20   16.87    6.37
   3   1  20  122.35   10.21
   3   0  20   29.11    5.44
   3  -1  20  129.44   10.22
   3  -2  20   20.90    5.32
   2   3  20   40.87    8.20
   2   2  20   12.18    5.97
   2   1  20    9.10    4.86
   2   0  20    1.34    4.37
   2  -1  20    5.66    4.46
   2  -2  20   15.44    5.13
   2  -3  20   29.79    6.19
   1   3  20   23.81    7.56
   1   2  20   28.29    6.25
   1   1  20  101.04    8.85
   1   0  20   38.39    5.49
   1  -1  20  110.70    9.07
   1  -2  20   29.57    5.72
   1  -3  20   28.14    6.17
   0   4  20   34.01    8.62
   0   3  20    3.13    6.53
   0   2  20   18.15    5.66
   0   1  20    0.95    4.36
   0   0  20   10.08    4.22
   0  -1  20    5.65    4.25
   0  -2  20   11.31    5.13
   0  -3  20    4.69    5.33
  -1   3  20   20.23    7.07
  -1   2  20   84.58    8.60
  -1   1  20   16.70    4.65
  -1   0  20  149.11   10.79
  -1  -1  20   16.82    4.67
  -1  -2  20   95.94    9.09
  -1  -3  20   21.67    6.10
  -2   3  20   21.85    6.76
   2  -3 -20   17.71    4.91
  -2   2  20   18.89    5.31
  -2   1  20   10.44    4.25
  -2   0  20    1.18    3.85
  -2  -1  20    6.88    4.52
  -2  -2  20   19.45    5.43
  -2  -3  20   18.26    6.34
   3  -3 -20  127.10   10.21
  -3   3  20  148.40   11.97
  -3   2  20    2.42    4.64
  -3   1  20  148.89   10.81
  -3   0  20   48.14    6.24
  -3  -1  20  195.58   13.77
  -3  -2  20    7.39    5.41
  -3  -3  20  156.65   12.96
   4  -4 -20   18.17    5.24
   4  -3 -20   48.68    6.73
   4  -2 -20   11.55    4.26
  -4   2  20   12.85    4.72
  -4   1  20   19.61    4.40
  -4   0  20   28.83    4.89
  -4  -1  20   26.48    5.29
  -4  -2  20   12.87    5.89
  -4  -3  20   64.30    9.44
   5  -3 -20   11.92    4.55
  -5   2  20  138.76   10.70
   5  -2 -20  144.06   10.36
  -5   1  20  152.15   10.83
  -5   0  20  231.71   15.31
  -5  -1  20  164.61   12.41
  -5  -2  20  177.48   14.00
  -5  -3  20   18.06    6.79
   6  -3 -20   22.75    5.14
   6  -2 -20   30.36    4.91
  -6   1  20    5.53    3.74
  -6   0  20    8.32    4.12
  -6  -1  20   12.01    5.16
  -6  -2  20   41.69    7.16
  -6  -3  20   27.84    7.63
   7  -3 -20   22.83    5.25
   7  -2 -20  200.50   13.39
  -7   1  20   18.13    4.09
  -7   0  20  204.45   13.87
  -7  -1  20   33.11    5.98
  -7  -2  20  247.03   17.77
  -7  -3  20   35.40    8.13
   8  -3 -20   50.48    7.04
   8  -2 -20    0.58    3.78
   8  -1 -20   18.26    3.97
  -8   0  20   12.88    4.21
  -8  -1  20   19.06    5.71
  -8  -2  20    4.84    6.13
  -8  -3  20   65.91   10.58
   9  -3 -20  120.38   10.15
   9  -2 -20   15.52    4.43
   9  -1 -20  209.32   13.58
  -9   0  20   -1.29    3.83
  -9  -1  20  239.36   16.72
  -9  -2  20   11.60    6.51
  -9  -3  20  163.35   14.72
  10  -3 -20   14.01    5.07
  10  -2 -20   18.79    4.63
  10  -1 -20    4.49    3.51
 -10  -1  20    2.65    5.07
 -10  -2  20   20.40    7.08
 -10  -3  20   21.13    8.14
  11  -3 -20    8.99    4.99
  11  -2 -20  112.88    9.28
  11  -1 -20   27.74    4.41
 -11  -1  20   32.31    6.30
 -11  -2  20  130.93   12.69
 -11  -3  20    7.48    8.13
  12  -3 -20   25.34    5.68
  12  -2 -20   36.84    5.45
  12  -1 -20    4.59    3.56
 -12  -2  20   42.79    8.30
 -12  -3  20   23.85    8.63
  13  -3 -20   28.89    5.96
  13  -2 -20   45.92    6.73
 -13  -2  20   50.43    8.77
   3   1  21   42.85    6.71
   3   0  21   52.72    7.29
   3  -1  21   36.18    6.12
   2   2  21    6.78    6.29
   2   1  21   14.97    5.60
   2   0  21    7.45    5.00
   2  -1  21   16.47    5.14
   2  -2  21    0.71    5.16
   1   2  21   11.27    6.16
   1   1  21   53.86    7.39
   1   0  21   -0.65    4.52
   1  -1  21   54.17    7.13
   1  -2  21   12.14    5.34
   0   3  21    0.84    7.01
   0   2  21   61.07    8.40
   0   1  21   27.13    5.64
   0   0  21   66.84    7.42
   0  -1  21   26.89    5.40
   0  -2  21   59.63    7.78
  -1   3  21   28.15    7.49
  -1   2  21  144.52   11.69
  -1   1  21   20.58    5.22
  -1   0  21  211.25   14.35
  -1  -1  21   25.27    5.42
  -1  -2  21  137.05   11.31
  -1  -3  21   19.18    6.10
  -2   3  21   11.50    6.79
  -2   2  21   17.05    5.53
  -2   1  21   41.91    6.54
  -2   0  21   33.42    5.31
  -2  -1  21   40.85    6.04
  -2  -2  21   19.22    5.84
  -2  -3  21    7.53    5.97
  -3   3  21   74.27    9.62
   3  -3 -21   65.40    7.73
  -3   2  21   41.18    6.30
  -3   1  21   35.35    5.54
  -3   0  21   51.63    6.65
  -3  -1  21   62.76    7.84
  -3  -2  21   49.11    7.14
  -3  -3  21   82.67   10.23
   4  -3 -21   28.69    5.51
  -4   2  21    4.95    5.03
  -4   1  21   54.05    6.73
  -4   0  21    2.10    4.18
  -4  -1  21   64.44    7.97
  -4  -2  21    8.34    5.79
  -4  -3  21   41.85    7.65
   5  -3 -21   29.28    5.58
  -5   2  21   55.66    7.26
   5  -2 -21   44.95    6.68
  -5   1  21   63.23    6.97
  -5   0  21   80.14    7.94
  -5  -1  21   78.98    8.46
  -5  -2  21   55.87    8.85
  -5  -3  21   37.97    7.89
   6  -3 -21    0.25    4.48
   6  -2 -21   32.21    5.26
  -6   1  21   22.00    4.53
  -6   0  21   66.06    7.38
  -6  -1  21   35.88    6.17
  -6  -2  21   34.37    7.09
  -6  -3  21    2.19    6.72
   7  -3 -21   32.32    5.79
   7  -2 -21   85.97    8.15
  -7   1  21    7.75    3.98
  -7   0  21   40.52    5.57
  -7  -1  21   10.86    5.46
  -7  -2  21   97.57   10.87
  -7  -3  21   38.30    8.35
   8  -3 -21    3.06    4.80
   8  -2 -21   34.10    5.30
  -8   0  21   63.75    7.32
  -8  -1  21   61.49    8.61
  -8  -2  21   32.30    7.37
  -8  -3  21    1.23    7.50
   9  -3 -21   47.57    6.56
   9  -2 -21   -2.74    3.85
   9  -1 -21  124.61    9.49
  -9   0  21   53.57    6.85
  -9  -1  21  152.70   12.62
  -9  -2  21   -1.99    6.30
  -9  -3  21   60.76    9.88
  10  -3 -21   18.41    5.45
  10  -2 -21   32.42    5.23
  10  -1 -21   62.41    6.82
 -10  -1  21   75.91    9.25
 -10  -2  21   34.78    7.74
 -10  -3  21   27.88    8.81
  11  -2 -21   51.43    6.95
  11  -1 -21   17.98    4.24
 -11  -1  21   23.01    6.14
 -11  -2  21   56.42    8.67
  12  -2 -21   74.39    7.88
 -12  -2  21   70.64    9.58
  13  -2 -21   19.80    5.00
 -13  -2  21   16.06    7.72
   1   1  22   53.97    7.96
   1   0  22    4.64    5.29
   1  -1  22   56.68    7.56
   0   2  22   55.79    8.73
   0   1  22   23.60    6.13
   0   0  22   45.66    7.06
   0  -1  22   24.78    5.71
  -1   3  22    5.52    7.47
  -1   2  22   74.08    9.13
  -1   1  22    4.06    5.16
  -1   0  22    9.40    4.96
  -1  -1  22    6.41    5.11
  -1  -2  22   92.90    9.65
  -2   3  22   32.70    8.11
  -2   2  22   27.44    6.44
  -2   1  22    9.09    5.17
  -2   0  22   44.65    6.77
  -2  -1  22   14.06    5.45
  -2  -2  22   23.26    6.33
  -3   2  22   11.67    5.72
  -3   1  22   25.48    5.45
  -3   0  22   11.10    4.80
  -3  -1  22   25.28    5.82
  -3  -2  22   14.19    6.08
  -4   2  22    3.81    5.21
  -4   1  22  161.69   11.97
  -4   0  22   -0.08    4.49
  -4  -1  22  186.94   13.82
  -4  -2  22    8.22    6.03
  -5   2  22   38.18    6.26
  -5   1  22   46.67    6.73
  -5   0  22   -0.40    4.56
  -5  -1  22   59.12    8.18
  -5  -2  22   44.22    7.65
  -6   1  22   32.55    5.36
  -6   0  22  157.64   11.82
  -6  -1  22   28.27    6.18
  -6  -2  22   56.36    8.35
   7  -2 -22   10.02    4.65
  -7   1  22   36.11    5.31
  -7   0  22   29.30    5.34
  -7  -1  22   50.41    6.96
  -7  -2  22   14.27    6.62
   8  -2 -22   65.14    7.59
  -8   0  22  112.89    9.71
  -8  -1  22   64.65    8.65
  -8  -2  22   75.54   10.36
   9  -2 -22   12.20    4.65
  -9   0  22   -1.61    4.32
  -9  -1  22   39.36    6.79
  -9  -2  22   10.07    6.90
  10  -2 -22    2.12    4.31
 -10  -1  22  127.35   11.77
 -10  -2  22   -5.76    6.32
  11  -2 -22   28.38    5.29
  11  -1 -22   13.57    4.25
 -11  -1  22    5.33    5.87
 -11  -2  22   33.02    7.70
  12  -2 -22   37.39    5.74
 -12  -2  22   37.32    8.08
  13  -2 -22   22.30    5.15
  -1   1  23   44.12    6.93
  -1   0  23   22.14    6.06
  -2   2  23   16.42    6.42
  -2   1  23    2.47    5.54
  -2   0  23  215.64   15.18
  -2  -1  23    2.06    5.37
  -3   2  23    7.70    5.92
  -3   1  23    8.52    5.42
  -3   0  23    7.66    5.13
  -3  -1  23    3.37    5.55
  -4   2  23    2.08    5.63
  -4   1  23  119.63   10.29
  -4   0  23   15.01    5.40
  -4  -1  23   95.98    9.92
  -5   1  23    4.89    4.94
  -5   0  23   90.57    8.90
  -5  -1  23    3.47    5.57
  -6   1  23   21.33    5.38
  -6   0  23  246.50   16.64
  -6  -1  23   33.69    6.66
  -7   0  23    2.72    4.88
  -7  -1  23   13.15    5.87
  -7  -2  23   13.85    7.04
  -8   0  23   98.53    9.31
  -8  -1  23    2.55    5.50
  -9  -1  23   27.23    6.36
 -10  -1  23   57.27    7.74
  -4   1  24   22.08    6.16
  -4   0  24    5.56    5.59
  -5   1  24   40.19    6.52
  -5   0  24   16.32    5.63
  -6   1  24   46.90    6.64
  -6   0  24   -0.36    5.06
  -7   0  24   40.51    6.37
  -8   0  24   24.62    5.87
  -8  -1  24   17.48    6.33
  -9  -1  24   29.64    6.67
 -10  -1  24   26.92    6.61
   0   0   0    0.00    0.00
;
_shelx_hkl_checksum   89378
